# Supplementary material for: Beneficial impacts of neuromuscular electrical stimulation on muscle structure and function in the zebrafish model of Duchenne muscular dystrophy
Source: eLife. 2022 Mar 24;11:e62760. doi: 10.7554/eLife.62760 (PMC8947762; doi:10.7554/eLife.62760)
Supplement: Source data 1. — Titles of panels also include the figure panel that the data is for. [file elife-62760-data1.xlsx]

## Sheet: Figure 2
Birefringence Measurements - Change in normalized birefringence from Day 5 to Day 8
Figure 2 E6		Figure 2 D6		Figure 2 C6		Figure 2 B6
No NMES	Endurance NMES	No NMES	Hypertrophy NMES	No NMES	Strength NMES	No NMES	Power NMES
12.3781	17.6201	8.76761	9.40051	8.97708	18.9042	5.80773	12.7362
1.04317	18.5394	17.1429	10.7346	9.74141	1.81157	5.24804	6.02029
5.41288	12.3966	0.444313	1.80806	3.94478	3.13936	-10.3225	18.9671
9.30507	13.2148	-2.59602	4.27225	9.48908	6.47771	-3.62987	9.55441
3.05011	24.5884	-15.7851	5.44906	13.0972	3.52617	6.98525	10.4507
-0.734233	30.5528	8.39687	8.45171	5.03409	-4.99166	10.7283	4.10335
-0.678497	6.74845	2.48394	3.92899	7.65291	5.78265	13.8921	9.41141
7.50203	30.7186	-0.0970781	5.08732	14.2236	3.50571	5.35117	9.52497
17.8158	3.83593	22.4219	4.30119	22.608	13.6784	14.4653	15.3612
5.86851	6.69623	-3.76848	-18.7034	8.00117	-4.59698	15.7208	10.661
4.59094	10.6349	14.0052	14.0674	8.58595	12.9635	5.70062	6.30061
10.8116	6.64775	15.6625	9.30803	17.0093	0.362546	13.5203	9.15834
19.0398	5.33437	-13.3476	17.1681	16.4413	5.98622	9.89602	10.5583
5.26656	21.9525	-13.7511	11.8011	2.66738	2.57963	9.09041	19.0701
14.1618	1.73491	19.0541	7.47521	1.04397	-6.77004	24.801	9.1064
3.7689	7.83936	14.3011	-6.99927	14.8958	12.6593	14.7916	16.7954
-5.05097	0.15016	11.5603	1.05817	7.4217	17.7517	11.8377	-3.0556
11.4408	18.7498	3.27774	10.5358	12.4379	0.708103	23.7578	8.63329
6.26099	-9.12462	16.5945	8.81429	7.66351	9.8348	8.73143	21.3026
5.48972	-2.69036	12.2577	1.12205	17.5792	10.6644	21.2691	13.7898
13.7491	24.3759	10.1381	17.3554	-0.482009	5.98403	8.30529	22.6165
9.79565	25.2827	13.6692	7.21832	11.0794	8.19172	7.02181	21.3341
7.21934	13.4897	5.39407	10.2966	12.1016	-6.21841	5.19982	23.5083
9.92208	6.61441	11.02	3.85312	18.2292	11.6427	7.20135	10.689
-0.417877	5.62289	16.5221	-5.41555	12.0074	30.9348	0.754321	0.484069
6.32531	-7.03853	6.9644	6.00963	18.2202	7.6443	9.03055	16.9925
-9.1888	6.15973	12.259	-0.691199	4.78614	9.77702	7.83728	9.79034
11.2594	13.7916	6.6332	8.31883	8.8975	14.0375	-1.83704	22.1606
5.27156	21.5205	17.3317	9.05875	17.103	12.0019	15.5464	24.3768
19.5015	16.1915	17.7053	9.12664	16.7456	6.46436	-7.28182	4.95794
20.7809	7.49885	20.1916	6.46459	11.4156	15.5197	15.3953	8.08034
10.0607	2.15929	1.78662	10.5439	2.29026	11.6787	9.54288	10.0045
7.00485	16.9655	7.89598	3.27545	26.1154	13.7198		28.2689
8.29596	28.0464	-1.24361	5.6654	1.09576	12.913		5.91576
13.1466	29.8395	1.17666	-1.08459	6.78157	-6.6115		8.25199
3.65634	24.9387	8.73364	-4.32083	11.6005	7.06658		17.2645
-2.87166	5.78832	7.84979	9.17877	10.6661	-0.195763
-38.6463	23.7192	7.48579	0.545803	9.90665	-0.28617
5.09286	14.9462		9.49714	9.33741	3.68698
-3.3993	8.30256		5.17339	11.9485	8.30712
14.9152	15.7469		2.70881	-16.6731	-4.61444
4.32008	-1.51119		-0.203426	11.0934	5.9893
28.6046	19.624		0.0533166	1.34211	8.61608
4.89246	12.4954		3.52858	4.40189	13.8791
24.1239	10.2707		-0.93955	-3.04413	-2.5981
-7.51135	6.8028		9.34166	35.4774	6.93756
15.9652	-6.97265		-0.734912	-0.206418	9.59895
3.34858	2.6028		7.85812	22
-1.66046	6.9336			28.1818
7.8055	13.3061
-0.854129	-1.2781
-0.536709	10.9645
7.21636	1.22393
23.5593	0.429875
9.10149	30.131
-9.60796	7.33378
23.351	16.803
2.84255	8.88692
21.3856	15.8144
20.4275	7.51925
3.02424	18.1842
-4.74198	17.049
-11.3976	9.91884
-15.3765	9.51389
-4.52481	12.4927
8.85577	19.3661
19.0551

## Sheet: Figure 3
Figure 3: % of segments with detatched muscle fibers
Figure 3 F2		Figure 3 E2		Figure 3 D2		Figure 3 C2
No NMES	endurance NMES	No NMES	Hypertrophy NMES	No NMES	Strength NMES	No NMES	Power NMES
50	31.25	50	68.1818	29.1667	34.6154	50	54.1667
70	18.75	50	53.8462	18.75	16.6667	50	26.9231
90	65	73.0769	50	27.7778	25	73.0769	46.1538
65	15	84.6154	41.6667	30.7692	30	84.6154	54.1667
60	50	37.5	20.8333	18.75	12.5	37.5	53.5714
50	25	100	58.3333	11.5385	50	100	50
63.6364	30	33.3333	62.5	13.6364	35	33.3333	33.3333
41.6667	27.2727	45.8333	54.1667	27.2727	63.6364	45.8333	16.6667
50	50	40.9091	37.5	18.1818	31.25	40.9091	41.6667
66.6667	50	45.8333	22.2222	38.8889	12.5	45.8333	31.8182
19.2308	45.8333	57.1429	57.1429	38.8889	16.6667	57.1429	37.5
53.8462	16.6667	31.8182	62.5	45.8333	37.5	31.8182	54.1667
34.6154	65.3846		33.3333	26.9231	8.33333		25
60.7143	7.69231		37.5	25	43.75		4.54545
25	30.7692		29.1667	19.2308	34.6154		26.9231
60	53.5714		54.5455	22.2222	18.75		12.5
83.3333	50		37.5	22.7273	20.8333		40.9091
50	26.6667		88.8889	38.4615	27.7778		12.5
25			44.4444		20.8333		19.2308
18.75			40.9091		27.2727		22.7273
38.8889			20.8333		16.6667
44.4444			41.6667		8.33333
					16.6667

## Sheet: Figure 4
Figure 4 data: NMJ analysis for all conditions
Skeleton Number									Skeleton Length
Figure 4 F2		Figure 4 E2		Figure 4 D2		Figure 4 C2			Figure 4 F3		Figure 4 E3		Figure 4 D3		Figure 4 C3
No NMES	END	No NMES	HYP	No NMES	STR	No NMES	POW		No NMES	END	No NMES	HYP	No NMES	STR	No NMES	POW
0	23	0	0	0	0	0	0		0	396.818	0	0	0	0	0	0
0	24	0	0	0	0	0	0		0	398.637	0	0	0	0	0	0
0	28	0	0	23	0	0	0		0	433.182	0	0	394.091	0	0	0
28	30	0	0	25	0	0	0		432.273	449.546	0	0	410.454	0	0	0
31	34	0	0	27	19	0	0		472.273	453.637	0	0	447.273	320.455	0	0
32	34	0	0	29	22	0	0		484.546	550.909	0	0	536.364	429.091	0	0
34	35	0	0	29	26	0	0		524.546	557.727	0	0	549.545	435	0	0
35	37	0	0	29	28	0	0		540	570	0	0	554.091	441.818	0	0
35	37	0	0	30	32	0	1		541.364	577.273	0	0	558.636	498.636	0	0.909091
37	38	0	0	30	35	0	1		543.182	605	0	0	574.546	544.545	0	3.63637
38	40	1	0	33	36	1	1		567.727	605.909	0.909091	0	627.727	547.727	0.909091	4.09091
39	41	1	0	34	36	1	1		572.273	616.364	0.909091	0	635.455	557.273	0.909091	5.90909
41	41	1	0	35	37	1	2		575.455	625.909	11.3636	0	650.455	559.091	11.3636	6.36364
41	43	2	0	35	38	2	2		583.637	627.727	15.4545	0	650.455	577.273	15.4545	17.2727
41	43	2	0	36	39	2	23		585.909	642.728	25.9091	0	656.364	582.273	25.9091	202.727
42	44	2	0	36	39	2	26		591.364	644.546	25.9091	0	656.364	588.182	25.9091	226.364
42	44	4	0	36	40	4	26		597.727	650.455	31.8182	0	657.273	597.727	31.8182	236.364
42	44	27	0	36	40	27	27		599.546	650.909	240.455	0	659.546	616.818	240.455	247.273
43	45	27	1	36	40	27	28		608.182	656.364	289.091	0.909091	661.364	618.182	289.091	256.364
43	45	28	1	37	41	28	28		613.636	662.273	296.364	0.909091	663.636	630	296.364	259.546
43	46	33	1	37	42	33	29		615	677.273	345	1.36364	675	638.182	345	296.364
44	47	33	1	37	43	33	29		621.818	697.273	381.818	1.81818	675.455	646.818	381.818	301.364
45	48	33	1	38	43	33	30		631.364	702.728	383.182	1.81818	675.909	661.364	383.182	303.182
45	49	34	1	38	43	34	31		646.364	708.182	395.909	2.27273	684.091	679.091	395.909	323.636
45	49	35	1	38	43	35	31		646.818	715.455	404.546	3.18182	690	693.182	404.546	332.273
45	50	35	1	39	43	35	31		657.728	715.455	408.182	6.36364	695	700.455	408.182	339.091
45	50	36	1	40	44	36	31		664.091	715.909	428.182	8.63636	700	712.728	428.182	351.818
46	50	36	1	41	44	36	32		666.364	721.364	435.455	10	700.909	720	435.455	355.454
46	50	36	1	41	44	36	32		668.182	722.728	436.818	10	730.455	721.568	436.818	375.454
46	51	37	1	41	44	37	32		676.818	723.637	445.909	12.7273	743.637	723.636	445.909	385.909
47	52	37	1	43	44	37	33		679.546	746.818	463.636	16.8182	748.182	727.728	463.636	387.273
47	52	37	2	43	45	37	33		684.546	748.636	465.909	18.6364	751.818	727.728	465.909	394.091
48	52	37	2	43	45	37	33		690.909	748.637	488.182	19.5455	761.364	731.364	488.182	395.454
49	52	38	2	44	45	38	33		691.818	753.182	488.637	22.7273	765	738.636	488.637	398.182
49	52	38	3	44	45	38	33		693.182	755.909	495.909	34.0909	767.727	754.091	495.909	401.364
50	53	38	3	44	46	38	35		696.818	759.546	509.091	41.3636	768.182	763.182	509.091	410
50	53	39	5	45	46	39	35		699.091	765	515	53.6364	773.182	772.273	515	419.091
52	53	40	31	45	48	40	35		703.182	766.364	516.818	245	774.546	776.364	516.818	427.727
52	54	40	31	46	48	40	35		709.546	777.273	522.727	271.818	775	786.818	522.727	436.818
52	54	40	32	47	48	40	35		713.637	780.455	528.182	319.546	776.364	796.818	528.182	438.636
52	54	41	32	47	48	41	36		714.091	783.182	545.909	377.727	786.818	803.636	545.909	444.091
53	54	41	34	47	48	41	36		734.546	785.455	546.364	389.091	790	806.818	546.364	445.454
53	55	41	34	48	49	41	36		738.637	785.909	551.364	400.909	791.364	810.338	551.364	446.364
54	55	41	35	48	49	41	37		739.546	789.091	555.455	411.818	792.727	810.909	555.455	451.364
54	55	41	36	49	49	41	37		762.728	789.091	555.909	450.454	794.091	815.455	555.909	457.273
54	55	42	36	49	50	42	37		768.182	789.545	557.727	457.273	798.182	819.091	557.727	459.546
54	56	42	37	50	50	42	37		771.818	789.545	562.273	473.636	799.091	819.091	562.273	465.454
54	56	42	37	50	50	42	37		772.273	791.818	574.545	476.364	800.909	827.727	574.545	471.364
55	56	42	38	51	50	42	37		775.455	801.364	577.273	486.364	801.364	828.182	577.273	471.818
55	56	43	38	52	50	43	37		776.364	801.364	578.182	489.546	805	836.364	578.182	475
55	56	43	39	52	50	43	38		782.727	803.637	580.455	497.727	811.818	843.637	580.455	475.455
55	56	43	39	52	50	43	39		782.728	804.546	582.727	505.909	813.636	845.909	582.727	475.909
55	56	44	39	52	51	44	39		786.818	806.364	589.091	507.273	815	849.198	589.091	478.182
56	57	45	40	52	52	45	39		792.728	807.273	591.818	534.545	815.909	851.364	591.818	481.364
56	57	45	41	53	52	45	39		798.637	815	605.455	537.727	821.364	854.091	605.455	482.273
56	58	45	42	53	52	45	39		800.455	816.818	609.091	542.273	826.818	857.273	609.091	483.636
56	58	45	42	53	52	45	39		808.182	821.364	614.091	561.364	826.818	863.636	614.091	486.364
56	59	45	42	53	53	45	39		813.637	837.273	614.546	565.455	829.545	867.727	614.546	486.818
57	59	46	43	53	53	46	39		814.091	837.273	615	575.455	831.364	872.273	615	491.818
57	60	46	43	54	53	46	40		814.091	841.819	620.909	579.546	837.273	872.273	620.909	497.727
58	60	46	44	55	53	46	40		814.091	843.636	622.728	584.546	840	874.091	622.728	503.182
58	61	46	44	55	54	46	40		814.545	844.545	635	585.909	840.455	875	635	503.182
58	61	46	44	55	54	46	40		819.091	845.909	635	586.818	844.091	875.909	635	505
59	61	48	45	55	54	48	40		821.819	854.546	643.637	594.545	848.182	879.546	643.637	507.273
59	61	48	45	56	55	48	40		822.728	858.182	645.455	596.364	848.636	880.909	645.455	511.364
59	62	49	45	56	55	49	41		825.455	865.455	645.909	607.273	855.455	881.364	645.909	514.545
59	62	49	46	56	55	49	41		826.364	867.728	646.818	608.182	856.818	885	646.818	518.182
60	62	50	46	57	55	50	41		827.273	877.273	647.273	608.637	857.273	885.909	647.273	520.455
60	63	50	46	57	56	50	42		834.091	877.727	649.091	612.728	859.091	896.819	649.091	525.455
60	63	50	46	58	56	50	42		835	879.091	652.273	614.091	861.818	897.727	652.273	525.909
60	63	51	47	58	56	51	42		836.819	883.636	658.637	616.364	865.909	904.091	658.637	528.636
61	63	51	47	58	57	51	43		841.819	885.455	661.364	619.545	867.727	910	661.364	535.455
61	64	51	48	58	57	51	43		843.182	888.637	665.455	621.364	872.728	911.364	665.455	538.182
61	64	52	48	58	57	52	43		851.364	891.818	667.727	623.636	878.637	911.818	667.727	538.636
61	64	52	49	59	57	52	43		853.182	891.819	667.728	627.727	883.636	913.636	667.728	538.636
61	64	52	49	59	58	52	43		855	892.728	671.364	628.636	886.819	918.637	671.364	540
62	65	52	49	59	58	52	44		856.818	896.819	679.546	630.455	888.636	920	679.546	540.455
62	65	53	49	59	59	53	44		865	897.273	682.728	631.818	892.273	923.636	682.728	541.364
62	65	53	49	59	59	53	44		865	899.545	684.546	634.091	892.727	924.545	684.546	548.182
62	65	53	49	60	59	53	45		866.364	907.273	687.727	637.727	893.636	925.909	687.727	550
62	65	53	49	60	59	53	45		868.637	910.909	687.728	647.273	895	930.455	687.728	555.909
62	65	53	50	60	60	53	46		875	920.909	694.545	648.636	900	930.909	694.545	555.909
63	66	53	50	60	60	53	46		876.364	921.364	702.727	651.818	905	934.402	702.727	557.273
63	66	53	50	60	60	53	46		877.273	921.818	703.636	653.636	908.637	935.828	703.636	558.637
63	66	53	50	60	60	53	46		881.364	925	704.091	654.091	910	936.364	704.091	561.818
63	67	54	50	61	61	54	46		886.364	926.364	710	661.818	919.545	941.364	710	569.091
63	67	54	50	61	61	54	46		888.182	929.545	729.546	662.273	920.455	945	729.546	570.455
63	67	54	51	61	62	54	46		888.182	930	730.909	662.273	920.909	946.364	730.909	572.273
64	68	54	51	61	62	54	46		900	942.273	730.909	672.273	922.273	947.273	730.909	575.909
64	68	55	52	61	62	55	46		901.819	942.727	731.818	678.636	923.182	947.727	731.818	580.455
64	68	55	52	61	62	55	46		909.545	947.273	739.545	681.364	924.091	950	739.545	584.091
65	69	55	52	61	62	55	47		916.819	948.182	742.728	684.545	924.091	950	742.728	585.909
65	69	55	52	61	63	55	47		917.273	949.546	746.364	685.455	933.182	956.364	746.364	595
65	69	55	52	61	63	55	47		923.637	953.636	749.545	686.818	935.909	959.091	749.545	598.182
65	69	56	53	61	64	56	47		929.546	954.091	749.546	689.091	939.545	963.182	749.546	602.273
65	69	56	53	62	64	56	47		929.546	954.091	753.182	691.364	941.364	964.091	753.182	609.545
66	70	56	53	62	65	56	47		934.545	957.727	762.727	695.455	945.455	969.546	762.727	611.818
66	71	56	53	62	65	56	48		946.819	959.091	766.364	697.728	953.182	977.273	766.364	613.182
67	71	56	53	62	66	56	48		947.727	959.546	767.273	699.091	959.545	979.546	767.273	619.545
68	71	56	54	62	66	56	48		947.728	964.091	769.091	700	960.455	983.182	769.091	619.546
68	71	57	54	63	66	57	48		948.637	966.819	772.273	705.455	961.364	986.818	772.273	626.364
68	71	57	54	63	66	57	48		949.091	969.091	772.727	705.909	966.364	990	772.727	626.818
68	71	57	54	63	66	57	48		956.818	969.091	777.273	707.728	969.545	990	777.273	630.909
68	71	57	54	63	66	57	49		965.455	971.364	781.364	709.545	971.819	990	781.364	631.818
69	72	57	54	64	67	57	49		965.455	971.818	781.818	710	972.273	993.636	781.818	634.091
69	72	58	55	65	67	58	49		969.091	971.818	785.909	722.273	973.636	995.455	785.909	635.909
69	73	58	55	65	67	58	50		972.727	972.273	796.364	723.182	977.273	998.637	796.364	637.273
70	73	59	55	65	67	59	50		973.182	974.091	801.364	723.637	980	999.286	801.364	647.273
70	73	59	55	65	67	59	50		974.545	977.273	807.273	728.182	982.727	1002.73	807.273	650.909
70	74	60	55	65	68	60	50		974.546	980	810.909	729.545	983.636	1009.54	810.909	653.636
70	75	60	56	66	68	60	50		980.909	982.273	811.364	731.364	984.091	1010	811.364	654.091
70	75	61	56	66	68	61	50		981.819	988.637	819.091	733.636	985.909	1013.18	819.091	654.091
71	75	61	56	66	68	61	50		981.819	989.091	830	735.909	989.545	1015.91	830	654.091
71	76	61	56	66	68	61	51		983.636	991.818	832.728	746.818	990.909	1017.27	832.728	655
71	76	61	56	67	69	61	51		983.637	996.364	837.727	748.636	993.182	1019.54	837.727	655
72	77	62	56	67	69	62	51		984.091	996.819	840.455	755	995	1022.73	840.455	655.909
72	77	62	57	68	69	62	51		989.091	997.728	855	755	995.455	1024.09	855	658.182
73	77	63	57	68	69	63	51		993.636	998.182	862.727	755.455	1000.46	1025.45	862.727	659.545
74	77	63	57	68	69	63	51		999.091	1000.91	869.545	755.455	1005.46	1027.73	869.545	669.091
74	77	63	57	68	70	63	52		1000.46	1012.73	875.455	755.909	1005.91	1028.18	875.455	669.545
75	78	64	57	68	70	64	52		1001.82	1012.73	880.909	757.728	1007.27	1028.64	880.909	670.455
75	78	65	57	68	70	65	52		1002.27	1014.09	891.818	758.637	1009.09	1029.55	891.818	675
75	78	65	57	68	70	65	52		1005.46	1016.36	895.455	760	1014.54	1030	895.455	678.182
75	78	65	58	68	71	65	52		1006.82	1022.73	904.091	760.455	1019.55	1030.91	904.091	679.091
75	79	65	58	68	71	65	53		1009.09	1024.55	910.909	762.727	1025	1033.64	910.909	680.455
75	79	66	58	69	71	66	53		1018.18	1030.91	920.909	763.182	1026.36	1038.18	920.909	683.182
76	79	66	58	69	71	66	53		1024.09	1035.91	924.091	773.636	1030.45	1040.91	924.091	684.546
76	79	66	58	69	71	66	53		1026.82	1036.36	924.546	773.636	1039.55	1043.18	924.546	684.546
77	80	67	58	70	71	67	53		1028.64	1038.64	926.364	777.727	1040.91	1048.64	926.364	687.273
77	80	67	58	70	71	67	53		1038.64	1042.73	930.909	778.636	1046.82	1054.09	930.909	689.546
77	80	67	58	70	71	67	53		1039.55	1052.27	948.637	779.091	1047.73	1058.18	948.637	690.455
77	80	67	59	70	72	67	53		1049.09	1053.18	951.364	781.818	1048.18	1059.54	951.364	691.818
77	81	68	59	70	72	68	54		1050.45	1055.45	954.546	786.364	1049.09	1059.55	954.546	697.273
78	81	68	59	70	73	68	54		1054.09	1056.36	957.273	786.364	1050.91	1064.09	957.273	697.273
79	81	68	59	71	74	68	54		1055.91	1060	958.637	789.091	1053.64	1065.45	958.637	698.182
79	81	69	59	71	74	69	54		1057.73	1061.36	959.546	795.909	1060.45	1066.31	959.546	700.455
79	81	69	59	71	74	69	54		1060.91	1080.91	964.545	796.364	1061.82	1067.73	964.545	703.636
80	81	69	59	71	74	69	54		1060.91	1083.18	966.364	796.818	1062.27	1068.64	966.364	705
80	82	69	60	72	75	69	55		1061.36	1086.82	972.727	798.637	1064.09	1071.66	972.727	706.818
80	82	69	60	72	75	69	55		1066.82	1090.91	980.909	799.546	1065.91	1072.01	980.909	713.637
81	82	70	60	72	75	70	55		1068.18	1094.55	982.273	803.182	1067.27	1075	982.273	717.273
81	82	70	60	72	76	70	55		1084.09	1095.45	983.636	804.545	1068.18	1075.91	983.636	718.636
82	83	71	60	72	76	71	55		1086.36	1101.82	984.091	805.455	1073.18	1080	984.091	723.636
82	83	73	60	72	76	73	55		1096.82	1105	987.727	805.455	1073.64	1081.36	987.727	723.637
82	83	74	61	72	76	74	55		1096.82	1108.64	987.728	805.909	1075.91	1085.91	987.728	725
82	83	75	61	73	76	75	55		1097.27	1109.09	990.455	807.273	1075.91	1088.18	990.455	727.273
82	84	75	61	73	77	75	55		1101.82	1110	992.273	811.364	1079.55	1093.18	992.273	729.545
82	84	76	61	73	77	76	56		1108.64	1114.55	993.637	815	1080.91	1096.36	993.637	731.364
82	85	76	62	73	78	76	56		1109.55	1115.91	995.909	815.455	1081.36	1100	995.909	731.364
84	85	77	62	73	78	77	56		1112.73	1126.36	1000.91	816.364	1082.73	1100	1000.91	733.182
84	85	77	62	74	79	77	56		1117.73	1126.82	1009.54	817.728	1086.36	1103.18	1009.54	733.182
85	85	77	62	74	79	77	56		1122.73	1126.82	1018.64	823.637	1086.82	1103.39	1018.64	733.637
85	85	78	62	74	79	78	56		1132.27	1129.09	1029.09	830	1087.73	1106.82	1029.09	736.364
85	86	79	62	74	80	79	56		1140.91	1135	1031.82	833.182	1087.73	1109.09	1031.82	736.818
85	86	80	62	74	80	80	57		1141.82	1135	1041.36	834.091	1088.18	1112.73	1041.36	737.727
86	86	81	63	74	80	81	57		1148.18	1137.73	1042.73	835.455	1089.55	1113.72	1042.73	739.091
86	86	81	63	74	80	81	57		1160.45	1138.18	1045.45	835.909	1090	1119.09	1045.45	740.455
86	87	81	63	74	80	81	57		1163.64	1140.45	1061.36	835.909	1092.27	1120.5	1061.36	740.455
87	87	82	64	75	80	82	58		1171.82	1158.64	1080.91	842.727	1095.45	1121.36	1080.91	742.273
87	88	83	64	75	80	83	58		1187.27	1165.45	1084.09	843.636	1095.45	1124.55	1084.09	743.637
87	88	85	64	75	80	85	58		1190.45	1166.36	1085	844.545	1097.27	1131.55	1085	744.091
87	88	85	64	75	80	85	58		1199.55	1166.82	1090	847.728	1100	1131.82	1090	745.909
87	89	86	64	75	81	86	58		1201.82	1171.82	1092.27	848.182	1106.36	1137.73	1092.27	749.546
87	89	86	65	76	81	86	58		1203.18	1174.09	1094.09	849.091	1107.27	1139.09	1094.09	750.909
88	89	87	65	76	82	87	59		1207.27	1176.36	1095.91	853.182	1111.82	1140.91	1095.91	754.091
88	89	87	65	76	82	87	59		1210.45	1187.27	1109.09	853.637	1123.64	1146.36	1109.09	756.364
89	90	89	65	76	82	89	59		1215.45	1200.45	1133.18	854.091	1124.09	1149.09	1133.18	757.728
89	90	89	65	76	82	89	59		1220.45	1211.82	1140	858.636	1124.55	1150.45	1140	758.637
91	90	89	66	76	82	89	59		1224.55	1217.27	1146.82	865	1130	1157.73	1146.82	760
91	90	90	66	76	82	90	59		1228.18	1218.18	1148.18	867.273	1130.91	1158.64	1148.18	762.728
92	91	90	66	76	83	90	59		1257.27	1222.27	1151.36	869.546	1135.45	1160	1151.36	763.182
93	91	91	66	77	83	91	59		1260	1223.18	1155.91	872.728	1136.36	1162.27	1155.91	763.182
93	91	91	66	77	83	91	59		1268.18	1227.27	1160.91	873.182	1137.73	1173.64	1160.91	767.273
93	92	92	66	77	83	92	59		1275.91	1241.36	1183.64	873.636	1140	1176.36	1183.64	767.273
94	92	94	66	77	84	94	59		1290.91	1244.09	1189.09	875	1147.73	1176.83	1189.09	769.545
94	93	95	66	78	84	95	59		1294.09	1261.36	1194.55	875	1151.82	1177.54	1194.55	773.636
94	93	96	67	78	84	96	59		1310.91	1261.82	1212.73	877.728	1154.09	1182.27	1212.73	774.091
94	93	96	67	78	84	96	59		1312.27	1270.45	1254.09	880.455	1155.45	1186.82	1254.09	775
94	93	96	67	78	84	96	60		1319.55	1275.45	1255.45	885.455	1155.91	1195.91	1255.45	777.273
95	93	96	67	78	84	96	60		1326.82	1275.91	1264.09	886.364	1161.36	1196.36	1264.09	778.182
96	94	97	67	79	85	97	60		1340.45	1284.55	1302.27	886.818	1168.64	1196.82	1302.27	780
98	94	99	68	79	85	99	60		1370.45	1289.09	1320.45	889.545	1170.45	1201.36	1320.45	781.364
98	94	101	68	79	85	101	61		1373.18	1290.45	1322.73	891.364	1171.82	1201.36	1322.73	781.364
103	95	101	68	79	86	101	61		1386.36	1295.91	1331.82	891.819	1172.27	1202.73	1331.82	781.818
107	95	103	68	79	86	103	61		1386.36	1296.82	1332.27	892.273	1172.73	1208.64	1332.27	782.727
107	95	110	68	80	86	110	61		1399.55	1296.82	1344.09	895.909	1175	1217.27	1344.09	786.364
108	96	113	69	80	87	113	61		1409.09	1298.18	1403.18	896.818	1175.91	1219.09	1403.18	786.364
108	96	114	69	80	87	114	62		1410	1310	1408.18	898.182	1179.09	1220.91	1408.18	789.091
110	97	114	69	80	87	114	62		1505	1314.09	1415.91	900.909	1181.82	1221.36	1415.91	794.545
111	97	119	69	81	88	119	62		1523.18	1314.55	1434.55	903.182	1184.09	1225.45	1434.55	794.546
115	97	120	69	81	89	120	62		1535	1315	1444.55	906.364	1185	1226.38	1444.55	798.182
116	98	121	69	81	89	121	62		1577.73	1318.18	1513.64	910.455	1185.91	1226.82	1513.64	799.091
120	98	136	70	82	89	136	62		1617.73	1325.91	1569.55	916.364	1187.27	1245.91	1569.55	799.546
121	98	149	70	82	89	149	62		1714.09	1332.73	1619.09	920.455	1190.91	1252.73	1619.09	800.909
122	99	164	70	82	89	164	62		2034.09	1335	1915.91	922.727	1194.09	1258.64	1915.91	802.727
	99		70	82	89		63			1335.91		922.727	1198.18	1258.64		802.728
	100		71	82	90		63			1337.73		923.182	1200	1264.55		804.545
	102		71	82	90		63			1339.55		923.636	1207.73	1269.52		809.546
	102		71	82	90		63			1354.09		924.091	1208.64	1278.79		815.455
	104		71	82	91		64			1370		925.909	1209.55	1283.42		817.273
	104		71	83	91		64			1372.73		927.727	1216.36	1283.78		817.727
	105		71	83	91		64			1378.18		928.637	1219.09	1290.91		819.091
	105		71	83	91		64			1378.64		935.455	1224.09	1290.91		826.364
	106		71	83	91		64			1379.09		935.909	1228.64	1301.6		831.364
	106		71	84	92		64			1382.27		937.273	1233.64	1301.96		833.636
	106		71	84	92		64			1382.73		943.182	1236.36	1302.27		833.636
	107		71	84	92		64			1384.55		945	1238.18	1302.27		834.091
	107		72	85	93		64			1400.45		947.273	1241.82	1307.73		836.364
	107		72	85	93		64			1414.09		948.182	1247.27	1308.02		836.364
	107		72	85	93		65			1415.45		948.637	1248.64	1318		840.909
	108		72	85	94		65			1419.09		950.455	1249.09	1319.09		840.909
	108		72	85	94		65			1434.09		950.909	1251.82	1319.55		840.909
	110		73	85	94		65			1437.73		951.819	1252.27	1325		841.819
	110		73	85	94		65			1449.55		953.182	1252.27	1325.13		845.455
	112		73	85	94		65			1450		954.091	1254.55	1328.18		847.727
	112		73	85	95		65			1464.09		954.545	1256.82	1333.18		847.727
	114		73	85	95		65			1478.64		958.182	1260.45	1337.97		847.727
	114		73	85	95		66			1480		962.273	1261.36	1342.27		847.728
	114		74	86	95		66			1547.27		965.909	1265	1347.27		848.182
	115		74	86	95		66			1551.36		968.636	1268.64	1347.73		849.091
	116		74	86	96		66			1583.64		968.636	1273.64	1349.55		850
	116		74	86	97		66			1592.27		968.637	1278.18	1351.82		851.364
	119		74	86	98		67			1603.18		973.182	1278.64	1354.55		851.818
	123		74	86	98		67			1628.64		973.637	1280.45	1357.27		851.818
	125		74	86	98		67			1707.73		973.637	1285	1357.73		857.273
	127		74	86	98		67			1737.27		976.364	1285.91	1358.18		857.727
	131		75	86	98		67			1789.09		976.364	1289.09	1362.21		857.728
	131		75	87	99		68			1806.36		976.819	1289.55	1367.91		859.091
	134		75	87	99		68			1839.09		977.273	1290	1373.18		862.727
	136		75	87	100		68			1889.09		984.546	1290.91	1375.91		863.182
	138		75	87	100		68			1897.27		986.819	1294.09	1383.24		863.636
	144		75	87	100		68			1942.73		988.182	1294.55	1384.09		865.909
			76	87	101		68					989.091	1305	1387.73		866.818
			76	87	101		68					989.545	1306.36	1391.36		869.545
			76	88	101		69					989.546	1308.64	1392.87		872.273
			76	88	101		69					990.909	1309.55	1393.64		875
			77	88	101		69					991.364	1310	1395.45		878.637
			77	88	101		69					992.273	1313.18	1397.27		880.455
			78	88	101		70					993.182	1314.09	1400		885.455
			78	89	102		70					995.455	1314.55	1400.91		890.909
			78	89	102		70					995.909	1315.91	1402.27		899.091
			78	90	102		71					999.091	1327.73	1406.77		899.545
			78	90	102		71					1000.46	1330	1410.91		900.909
			78	90	103		71					1004.09	1334.55	1413.55		905
			78	90	103		72					1005.91	1335.91	1415		905
			79	91	103		72					1006.82	1352.73	1415.33		908.637
			79	91	103		72					1009.09	1352.73	1417.47		909.545
			79	92	103		72					1012.27	1354.09	1419.25		914.545
			79	92	104		72					1012.73	1355.91	1420.91		914.546
			80	92	104		72					1014.09	1357.27	1425.45		920
			80	92	106		73					1016.82	1361.82	1426.36		925.455
			80	92	106		73					1017.73	1368.64	1430.45		925.909
			80	92	107		73					1017.73	1374.09	1438.64		927.273
			80	92	107		73					1018.18	1376.82	1443.64		928.637
			80	93	107		74					1024.55	1377.27	1444.21		929.091
			80	93	107		74					1027.73	1378.64	1449.55		931.364
			81	93	108		75					1030.45	1387.27	1454.19		935.455
			81	93	108		75					1030.45	1392.73	1454.9		935.455
			81	94	108		76					1030.91	1393.64	1460.91		937.273
			82	94	108		76					1032.73	1399.55	1462.74		937.273
			82	94	109		76					1033.64	1400.45	1463.64		944.091
			82	94	109		76					1033.64	1411.82	1476.82		944.545
			82	95	109		76					1035.45	1414.55	1492.27		947.728
			82	95	110		77					1038.64	1419.55	1492.73		952.728
			82	95	110		77					1042.27	1420.45	1498.18		956.819
			82	96	111		77					1043.18	1428.64	1507.73		959.091
			82	96	112		77					1045.91	1429.09	1510.87		959.545
			82	96	112		77					1051.36	1432.73	1514.55		962.727
			82	97	112		78					1051.82	1433.64	1517.73		963.636
			83	97	112		78					1055.45	1438.18	1544.09		966.818
			83	98	113		79					1055.45	1441.36	1545.1		967.273
			83	98	114		79					1057.73	1447.27	1553.18		974.545
			83	98	114		79					1057.73	1447.73	1554.37		975.455
			84	98	114		79					1060.45	1453.64	1554.72		975.455
			84	98	117		79					1063.64	1465	1560.43		977.273
			84	99	117		79					1068.18	1475.91	1560.45		977.728
			84	100	117		80					1069.09	1476.36	1568.64		979.091
			85	100	117		80					1070.91	1477.73	1611.41		984.546
			85	100	117		80					1074.09	1485	1621.39		988.182
			85	100	117		82					1076.36	1487.27	1624.55		989.545
			85	100	119		82					1076.82	1489.09	1625.45		999.545
			85	100	119		83					1081.82	1500	1661.82		1002.27
			85	101	119		83					1086.36	1500.91	1662.27		1006.82
			85	101	119		85					1086.36	1502.27	1670.45		1007.27
			85	102	119		85					1091.36	1519.55	1675.45		1011.82
			86	102	121		85					1093.64	1527.73	1679.14		1019.09
			86	102	121		86					1096.36	1545.45	1686.63		1024.55
			86	103	121		86					1096.82	1556.82	1702.67		1027.73
			86	103	121		86					1097.27	1559.09	1709.45		1030
			86	103	121		87					1098.64	1563.64	1720.5		1035
			86	104	123		87					1098.64	1565	1723.35		1037.27
			86	104	123		88					1099.55	1570.91	1735.45		1037.73
			86	104	123		88					1100.45	1585	1752.94		1038.64
			87	104	124		89					1100.91	1585.91	1761.14		1042.73
			87	105	124		89					1106.36	1586.36	1763.64		1045
			87	105	125		89					1109.55	1595.91	1765.06		1050.91
			88	105	127		90					1117.27	1598.64	1766.13		1051.36
			88	105	127		91					1117.27	1603.64	1770		1051.82
			88	106	129		91					1119.09	1603.64	1775.04		1052.73
			89	106	129		92					1130.45	1630	1777.73		1053.18
			89	106	130		92					1132.73	1650.91	1778.61		1054.09
			89	107	130		92					1136.36	1658.18	1782.73		1070.45
			89	108	130		92					1138.64	1683.64	1796.43		1074.09
			89	108	130		92					1140.45	1686.82	1802.85		1075.45
			90	109	130		93					1141.82	1688.18	1811.76		1083.64
			90	109	131		93					1146.36	1689.09	1845.91		1093.18
			90	109	131		93					1150.45	1695.91	1871.82		1096.82
			91	110	132		93					1156.82	1697.27	1913.37		1098.18
			91	113	132		94					1160.91	1698.64	1922.28		1098.64
			92	114	133		94					1162.27	1738.18	1924.55		1100
			92	115	134		94					1164.09	1749.55	1927.27		1110
			92	117	135		95					1164.55	1760.45	1934.05		1114.55
			92	117	135		95					1167.27	1763.18	1937.61		1115.91
			93	117	135		95					1167.73	1763.64	1960.78		1116.36
			93	118	137		96					1169.09	1786.82	1975.05		1121.36
			93	118	138		96					1185	1800.91	1991.8		1123.18
			94	119	138		96					1188.18	1807.73	2021.74		1128.18
			94	120	139		97					1193.18	1879.09	2031.37		1129.55
			94	121	141		98					1196.36	1886.36	2098.39		1142.27
			96	122	142		99					1199.55	1893.18	2131.55		1149.09
			97	125	143		99					1203.18	1909.09	2160.43		1163.18
			98	126	144		100					1207.27	1926.36	2171.83		1164.55
			98	128	145		100					1207.27	2004.55	2184.55		1165
			98	129	145		100					1210.45	2013.64	2193.94		1166.82
			98	132	145		100					1212.73	2023.18	2227.09		1167.73
			99	134	145		100					1220.91	2030.91	2256.82		1175.91
			99	134	147		102					1221.82	2051.36	2308.73		1178.64
			99	140	148		103					1225.45	2140	2320.5		1181.82
			99	146	149		103					1237.27	2381.82	2347.59		1189.09
			100	178	150		104					1245.45	2422.73	2349.02		1210.45
			100		150		108					1248.64		2376.11		1217.27
			101		151		109					1259.09		2412.12		1227.73
			101		151		109					1260.91		2417.27		1235
			103		152		110					1261.82		2440.28		1235.45
			103		152		111					1266.82		2454.19		1238.64
			104		153		112					1269.09		2489.84		1241.82
			104		153		113					1282.27		2494.09		1247.73
			104		154		113					1285		2584.67		1255.91
			104		155		113					1285.45		2593.58		1256.36
			105		156		115					1289.55		2612.48		1299.09
			106		156		115					1292.73		2713.01		1303.64
			106		157		116					1295.91		2773.97		1321.82
			107		159		117					1302.73		2898.39		1335.45
			108		160		118					1302.73		2899.11		1354.09
			108		160		119					1303.18		2943.31		1402.73
			109		161		119					1307.27		2959.36		1409.55
			109		162		122					1334.09		2973.97		1433.18
			109		162		131					1334.55		2980.39		1450
			110		162		137					1340		2980.75		1508.18
			111		165		153					1342.73		3113.37		1594.55
			111		167							1344.09		3138.68
			112		168							1353.64		3171.48
			113		168							1355.91		3180.75
			113		168							1356.82		3191.44
			113		171							1368.64		3247.06
			113		174							1373.18		3293.76
			114		174							1378.64		3300.53
			115		178							1382.27		3377.18
			116		181							1388.64		3388.59
			116		182							1391.82		3399.28
			117		184							1409.09		3413.9
			118		185							1414.09		3461.67
			119		188							1429.09		3622.1
			119		190							1434.09		3626.02
			120		192							1436.82		3676.29
			120		192							1441.82		3678.07
			122		194							1447.73		3727.63
			122		196							1450.45		3760.78
			123		196							1454.55		3790.73
			127		198							1492.27		3826.74
			131		201							1505.45		3893.05
			132		202							1526.82		3932.97
			137		203							1541.82		4048.12
			138		204							1558.18		4131.19
			145		208							1562.27		4162.56
			145		215							1624.55		4191.09
			148		222							1675.45		4271.3
			150		232							1885.91		4699.11
			153									2062.27

## Sheet: Figure 5
Figure 5: Data for motility analysis
Velocity								Distance
5 B4		5 B3		5 B2		5 B1		5 A4		5 A3		5 A2		5 A1
No NMES	END	No NMES	HYP	No NMES	STR	No NMES	POW	No NMES	END	No NMES	HYP	No NMES	STR	No NMES	POW
2.39057	4.1185	2.77049	4.51809	6.19275	0.551004	2.77049	4.27519	141.922	244.78	164.2	256.179	285.337	19.5425	164.2	241.124
2.51953	4.58281	2.08372	4.60894	5.56046	0.909114	2.08372	3.324	142.727	221.703	122.386	261.33	288.852	54.0931	122.386	185.703
1.83272	4.72	2.80148	3.14402	3.84958	0.435508	2.80148	3.96239	208.18	179.646	144.372	178.268	343.829	25.5937	144.372	236.03
2.14855	4.93349	0.041485	2.18046	2.57224	1.16847	0.041485	3.73107	184.573	168.732	2.46149	123.634	299.966	69.1743	2.46149	222.25
1.65998	5.23242	4.07347	5.01121	2.64597	1.24496	4.07347	3.34818	189.737	182.632	241.696	293.327	311.663	64.5727	241.696	199.443
2.40413	3.73023	0.593184	2.06546	4.84437	3.96709	0.593184	2.05936	279.979	213.389	35.1961	121.451	318.656	227.053	35.1961	122.671
2.25213	3.93894	1.94769	4.2988	5.11537	5.32205	1.94769	2.99019	142.989	214.3	115.564	252.773	306.025	316.666	115.564	178.118
2.14832	3.55295	6.39118	3.25467	5.84404	6.09469	6.39118	4.27222	150.082	195.022	379.216	190.618	297.254	358.17	379.216	254.485
2.17235	4.36207	3.48005	2.8794	5.1014	6.81753	3.48005	1.42805	134.154	219.546	198.134	169.311	312.994	403.603	198.134	85.0652
2.06088	5.0168	3.90839	3.03398	5.30633	5.67279	3.90839	2.46146	146.165	251.491	231.901	178.4	301.769	294.233	231.901	146.623
3.50663	3.0226	2.5084	1.46112	5.4131	3.27837	2.5084	2.52526	213.447	149.278	148.834	85.9149	283.335	194.629	148.834	146.888
2.45377	3.31176	1.70214	3.35747	5.4195	4.75027	1.70214	2.82139	144.514	272.07	100.995	195.296	261.306	282.645	100.995	163.831
2.50665	3.61521	4.30881	2.12442	5.05241	6.38217	4.30881	2.69163	247.178	233.845	243.451	124.917	259.278	371.873	243.451	159.346
2.20338	4.48815	4.18398	3.09231	5.32295	6.79682	4.18398	3.06287	147.397	196.611	236.956	181.83	244.276	390.596	236.956	181.325
3.10491	3.93698	5.12944	3.39092	5.13788	5.85607	5.12944	3.87003	109.354	199.787	288.62	199.388	273.582	303.739	288.62	229.109
3.10899	2.83897	0	3.60925	4.81037	0	0	2.96992	128.185	136.543	0	207.415	458.87	0	0	175.822
3.58328	3.36527	4.21911	4.26399	4.62755	0.017002	4.21911	2.43473	149.565	243.718	239.226	245.04	375.889	1.01162	239.226	144.138
3.02159	3.02902	2.75522	3.9632	4.40692	0.034428	2.75522	0.978829	180.291	272.349	156.223	221.414	373.207	2.02324	156.223	57.9474
4.1593	3.46843	4.39307	2.98453	4.1543	0.034176	4.39307	2.93606	144.038	117.135	249.091	171.115	354.239	2.02324	249.091	173.817
3.76595	3.54418	3.2702	3.54942	4.65797	0.019504	3.2702	3.8925	288.482	285.715	185.423	203.976	467.496	1.01162	185.423	231.996
3.19597	3.07284	3.00692	2.56116	7.80381	7.08537	3.00692	3.53767	184.566	246.227	178.914	147.013	417.789	420.64	178.914	210.848
2.42606	2.29995	3.9076	3.58409	6.65674	9.35151	3.9076	4.21658	127.196	140.3	232.505	205.968	399.418	555.799	232.505	252.015
2.41401	3.6121	3.826	3.95459	6.34338	12.5874	3.826	3.35033	128.605	280.529	227.65	226.206	452.57	738.89	227.65	200.241
0.671281	4.35152	0.812818	8.19912	6.02439	8.57277	0.812818	4.18477	130.442	211.167	48.3634	471.183	441.535	507.515	48.3634	250.113
0.487321	4.27757	3.95368	4.15611	7.95953	9.28941	3.95368	3.48822	246.234	214.867	234.984	238.841	517.671	481.817	234.984	208.133
4.71603	3.59034	1.03781	4.30604	7.10919	4.10345	1.03781	4.00977	39.7404	180.027	61.7509	257.648	307.541	243.612	61.7509	239.654
4.14955	4.10525	2.40521	4.94149	7.1622	4.61373	2.40521	4.26016	279.65	214.682	143.112	295.67	307.886	274.521	143.112	254.619
4.83482	4.55465	8.57059	2.94847	7.78047	3.56275	8.57059	2.3751	194.82	270.702	509.957	176.419	288.365	209.374	509.957	141.954
4.72376	4.69503	2.84283	1.36572	7.59511	3.93973	2.84283	3.70793	98.6596	309.346	169.15	81.717	327.486	233.235	169.15	221.614
4.94619	4.60356	3.18705	3.65191	8.92011	4.47729	3.18705	1.70632	122.487	48.5881	189.632	217.536	352.885	232.225	189.632	101.243
2.40584	3.60567	3.14412	2.47572	5.22134	0.781112	3.14412	4.66575	184.538	245.504	187.078	147.473	187.891	46.3727	187.078	274.661
2.48279	4.58752	3.78074	2.4171	5.45244	0.408861	3.78074	3.37353	223.826	244.464	224.957	143.98	173.391	24.3276	224.957	200.166
3.10538	5.20485	4.75048	4.34447	4.90132	0.061768	4.75048	3.66469	28.9636	160.344	284.241	258.789	153.989	3.62996	284.241	217.441
3.28528	5.23375	4.96378	4.34046	5.5694	0.014485	4.96378	3.83363	293.973	292.56	297.004	258.551	137.635	0.857542	297.004	227.465
3.84617	5.59612	4.6533	3.07724	6.00817	0	4.6533	3.15127	228.594	258.674	278.116	183.304	135.437	0	278.116	186.978
3.40306	3.28131	2.99758	2.39152	3.18996	1.92825	2.99758	2.88822	202.258	266.151	179.358	142.457	0.479246	114.476	179.358	171.37
2.42331	1.97305	4.26764	5.57812	3.07064	2.67249	4.26764	1.62275	144.108	205.681	255.35	332.274	2.4471	159.016	255.35	96.2844
2.22575	0.817512	5.45734	6.1109	2.61734	2.9798	5.45734	3.65061	131.84	258.049	326.535	364.011	57.1658	175.115	326.535	216.606
2.72806	2.89129	3.8183	3.81067	2.3407	2.97951	3.8183	3.79041	162.595	278.419	228.464	226.992	68.386	176.389	228.464	225.912
2.5324	3.52154	2.46794	4.78989	2.30594	3.4559	2.46794	3.59226	124.005	310.366	147.667	285.322	1.32966	179.248	147.667	214.102
2.54127	3.69394	4.15757	3.72873	1.79714	4.07024	4.15757	4.34633	151.038	171.455	243.36	222.235	268.454	241.64	243.36	257.886
3.32308	4.81265	4.88632	4.63833	0.138513	4.26003	4.88632	4.4647	197.615	276.419	286.017	276.448	248.036	253.475	286.017	264.909
3.38154	4.13069	3.60561	5.6275	0.971641	4.35296	3.60561	2.38599	200.303	263.048	211.051	335.404	272.582	255.812	211.051	141.571
2.81934	4.66131	1.8319	2.90609	1.19207	4.06531	1.8319	3.62475	168.035	98.6012	107.228	173.206	290.289	240.67	107.228	215.071
2.00374	4.31445	3.9591	3.61769	0.022639	4.2436	3.9591	4.28594	98.118	310.984	231.742	215.376	320.238	220.104	231.742	254.303
4.04813	4.23143	2.93553	2.43069	4.55772	2.85342	2.93553	4.45255	240.597	298.169	171.829	144.871	350.379	169.4	171.829	264.188
4.6908	4.1475	2.8697	3.51056	4.39254	2.21582	2.8697	2.71583	278.95	233.991	167.976	201.392	367.01	131.843	167.976	161.141
3.80222	4.11319	6.23153	3.9088	4.63305	3.34041	6.23153	3.29543	225.222	210.646	364.757	232.968	342.169	196.308	364.757	195.532
3.31383	4.43583	2.97173	4.36159	4.93682	3.50727	2.97173	3.08551	197.507	254.233	173.947	259.954	416.788	207.633	173.947	176.802
3.36594	4.18833	3.53605	4.71898	5.45232	2.23445	3.53605	4.30295	164.821	273.609	206.98	281.255	385.466	115.895	206.98	246.276
4.42275	2.51447	4.23802	4.29472	5.94863	0.612396	4.23802	2.83593	262.862	332.601	248.069	253.678	233.4	36.3566	248.069	162.501
3.75161	2.35531	3.02338	5.07956	6.4995	1.9434	3.02338	4.40028	223.099	209.3	176.971	300.037	251.922	116.282	176.971	252.139
2.54133	2.6873	3.90518	3.8989	5.81582	1.27506	3.90518	3.94065	150.533	256.426	230.67	230.298	266.541	75.1446	230.67	225.802
2.43086	1.66554	4.56579	4.65842	7.08813	2.04739	4.56579	3.07906	144.881	248.93	269.69	275.161	303.937	114.451	269.69	176.433
2.44777	1.86989	5.10963	5.04782	6.5629	2.40607	5.10963	2.87631	119.861	111.135	301.813	299.845	314.457	138.591	301.813	164.815
1.84097	5.85755	3.4273	1.85641	3.96259	1.49127	3.4273	1.82234	109.416	347.553	188.39	110.273	272.858	88.4334	188.39	104.422
3.50713	6.01694	4.19584	0.733705	4.47193	2.17674	4.19584	3.33125	208.56	358.013	247.838	43.5827	277.041	130.244	247.838	190.883
3.84494	5.55495	5.89956	4.15847	4.5823	2.2767	5.89956	3.86386	227.752	330.709	348.472	247.016	306.737	134.175	348.472	230.418
3.53734	5.12567	3.64127	3.16946	5.16893	2.97992	3.64127	3.60121	210.828	305.494	215.081	188.269	307.253	166.58	215.081	214.755
2.49612	5.72311	2.02472	3.21951	5.3937	2.38151	2.02472	4.21543	122.229	338.432	119.595	191.242	309.283	140.352	119.595	250.119
4.59639	5.76927	4.9417	2.79465	4.6325	2.71946	4.9417	4.75542	273.182	342.315	277.398	166.005	184.316	161.447	277.398	282.159
5.93663	5.46061	5.05318	4.86936	4.90621	1.52059	5.05318	3.27159	353.036	324.911	283.656	289.244	159.339	90.9834	283.656	194.117
6.08297	5.33416	3.73591	2.34463	5.21359	2.39848	3.73591	3.18518	360.319	317.565	209.712	139.273	154.914	141.352	209.712	188.99
6.4814	5.5123	1.58648	4.62619	5.22531	1.8092	1.58648	4.12625	386.297	328.537	89.0555	274.799	141.478	101.135	89.0555	244.827
6.48594	6.13529	3.60326	4.52597	5.26581	1.70082	3.60326	4.82793	317.599	362.805	202.266	268.846	159.925	100.236	202.266	286.461
3.74088	3.52941	1.4447	3.3749	3.32096	6.62626	1.4447	2.59975	221.962	209.414	81.0972	201.147	178.12	305.695	81.0972	154.254
4.66709	4.63446	3.33867	4.83554	2.71905	8.42795	3.33867	3.14271	277.696	275.754	187.413	288.202	216.815	384.601	187.413	186.47
4.76673	1.10272	6.77515	4.22071	2.61675	7.19922	6.77515	2.4288	283.783	65.6495	380.317	246.211	263.508	321.33	380.317	142.572
5.53824	1.08378	2.93915	2.71614	2.37907	5.75756	2.93915	3.78458	330.084	64.5944	164.986	161.884	257.645	282.7	164.986	222.158
4.43573	4.46016	3.778	4.29872	2.70903	5.6383	3.778	2.58384	262.303	263.748	212.075	243.311	291.814	308.607	212.075	151.673
2.64001	4.07808	4.57385	2.63508	3.20933	0.003429	4.57385	4.14442	156.027	241.97	256.749	157.053	27.6071	0.203545	256.749	243.281
2.2377	4.2022	3.56476	3.98427	3.69987	0.590796	3.56476	3.64961	125.835	250.034	200.105	237.466	5.30472	35.3497	200.105	214.235
2.47034	4.6848	4.55896	4.01396	4.45109	3.63507	4.55896	3.39865	146.823	278.906	272.781	239.235	8.22721	214.23	272.781	199.504
2.51396	4.65144	5.36701	4.34209	4.33254	1.92558	5.36701	2.68007	149.247	277.229	321.131	258.792	18.6382	107.642	321.131	157.322
1.64006	4.32893	5.33605	4.23709	4.94313	0.41165	5.33605	2.36342	97.3663	255.987	319.278	252.534	20.0252	24.2602	319.278	138.735
2.19801	4.67859	0.869634	4.39664	0.497418	2.4797	0.869634	3.91457	129.904	277.6	52.0339	263.069	42.9614	147.214	52.0339	229.789
3.30254	4.24233	3.30403	5.57946	0.090523	2.73741	3.30403	3.76225	185.715	252.422	197.694	333.843	18.2015	163.791	197.694	223.731
3.2077	4.62409	5.25901	3.0875	0.138971	2.69357	5.25901	3.46918	190.647	275.291	314.669	184.738	74.9732	158.744	314.669	206.304
3.71801	4.813	3.11621	4.14827	0.313418	3.05582	3.11621	4.02706	220.729	286.859	186.456	248.208	91.3757	170.823	186.456	238.137
3.5831	3.96198	2.48033	2.85433	0.339214	2.24461	2.48033	4.52359	212.72	234.288	148.408	169.835	88.1344	132.284	148.408	267.499
3.33696	7.04888	4.03176	1.71162	0.774067	1.37788	4.03176	4.02527	197.217	418.24	239.49	101.843	383.295	81.8011	239.49	238.031
3.59261	7.47954	5.42651	1.29291	0.310601	2.31332	5.42651	1.70014	202.027	445.039	322.339	76.9293	429.676	138.416	322.339	100.536
3.02718	7.24635	3.17278	4.75471	1.26642	2.29255	3.17278	4.06724	179.918	431.406	188.466	282.909	359.071	135.109	188.466	240.513
3.55492	6.56563	1.3588	3.40034	1.53656	2.0917	1.3588	4.95756	211.047	391.317	80.7135	202.323	441.861	116.927	80.7135	293.161
2.57547	5.16232	3.45507	2.88784	1.49294	2.86533	3.45507	2.18646	152.899	305.27	205.234	171.829	425.583	168.866	205.234	129.294
3.73641	4.50534	3.78435	2.39885	6.94365	4.98391	3.78435	2.83149	220.825	267.321	224.793	142.734	75.9539	295.882	224.793	167.438
4.1346	5.72322	2.77725	7.53244	7.33225	4.70683	2.77725	2.30365	232.506	340.536	164.971	448.186	186.524	281.63	164.971	137.299
4.43212	5.53473	4.82711	3.29306	6.0653	5.12904	4.82711	4.3418	263.419	329.506	286.735	195.94	205.971	302.276	286.735	258.486
3.86788	5.24672	2.48053	4.80485	7.4303	4.88696	2.48053	2.5729	229.627	312.709	147.345	285.892	191.777	273.185	147.345	153.347
2.71851	5.63613	3.24784	4.53149	7.21725	4.76601	3.24784	5.34596	161.391	333.288	192.925	269.627	233.413	280.881	192.925	318.624
3.28711	2.98591	3.93787	3.6716	2.93633	4.05404	3.93787	3.6924	194.271	177.167	233.913	218.953	197.174	240.678	233.913	220.07
2.92425	2.80772	3.70006	5.19042	3.18295	5.08705	3.70006	3.5129	164.442	167.062	219.786	309.526	250.964	302.005	219.786	209.372
2.58301	2.89584	3.18079	4.94445	3.47919	4.70409	3.18079	2.77957	153.519	172.402	189.153	294.858	271.044	277.231	189.153	165.665
3.32816	3.59797	4.0974	3.01281	3.2249	4.89099	4.0974	2.78605	197.585	214.442	243.662	179.667	277.777	273.41	243.662	166.051
2.7808	3.82346	4.28374	4.33639	3.95386	5.32256	4.28374	3.59845	165.089	226.097	254.744	255.706	299.94	311.196	254.744	214.471
5.7324	4.7308	1.27841	1.97749	3.55263	3.78039	1.27841	2.39574	338.789	280.698	76.0236	117.926	304.961	221.912	76.0236	143.267
7.06743	4.09404	3.22331	3.93499	4.28261	4.21653	3.22331	4.1252	397.431	243.599	191.682	231.905	388.058	243.719	191.682	246.69
5.8367	5.11429	5.84146	3.91646	4.57839	3.96759	5.84146	4.5688	346.899	304.475	347.377	233.555	422.979	227.346	347.377	252.353
3.76102	4.79305	3.11046	4.80851	4.67108	4.03403	3.11046	3.43592	223.283	285.67	184.971	284.668	466.497	237.742	184.971	189.78
5.18167	4.68512	2.26214	4.33639	5.0808	3.94655	2.26214	2.99248	307.623	277.051	134.524	258.597	438.297	230.876	134.524	165.287
5.27097	4.79239	2.75187	3.86821	5.49472	5.3007	2.75187	1.37046	311.343	284.353	164.472	230.033	320.57	313.099	164.472	75.6962
5.35281	4.53422	3.75005	4.41556	6.62205	5.48959	3.75005	4.33066	315.82	269.79	224.131	262.583	397.114	317.303	224.131	239.2
6.08726	4.42561	3.28216	1.47233	7.14482	5.4248	3.28216	3.95678	343.732	263.475	196.166	87.5556	393.74	310.845	196.166	218.549
5.43592	4.65431	1.01704	4.86518	7.85338	5.85896	1.01704	2.75287	322.355	277.401	60.7856	289.32	420.908	345.293	60.7856	152.053
5.81604	5.68064	4.27335	5.55062	7.42447	6.72607	4.27335	3.48297	344.702	335.92	255.407	327.861	410.809	393.48	255.407	192.378
	3.20836	4.45744	2.49666	5.77595	3.19618	4.45744	4.45754		190.686	266.41	147.471	67.0439	189.536	266.41	266.416
	3.14863	5.04148	2.4588	6.7766	4.35241	5.04148	5.04762		187.242	301.317	145.235	87.8264	251.573	301.317	301.347
	2.96389	3.12683	4.84081	6.65093	4.17138	3.12683	3.15939		175.564	186.883	285.935	97.0649	239.024	186.883	188.829
	3.18148	1.87546	5.25766	7.07795	3.59182	1.87546	5.70835		189.619	112.092	310.557	125.721	211.681	112.092	341.174
	2.86588	1.10959	3.70331	6.95883	2.84351	1.10959	0.290031		140.334	66.3172	218.745	83.2103	166.347	66.3172	17.3345
	5.70837	2.33579	1.96136	1.20798	3.94861	2.33579	3.98145		337.179	139.604	115.852	221.736	228.101	139.604	237.961
	5.66271	1.91628	7.53585	1.49872	4.27806	1.91628	2.12417		334.105	114.531	445.124	211.98	245.421	114.531	125.47
	6.25352	5.00023	3.02471	1.63959	4.10351	5.00023	2.67718		353.12	297.851	178.662	275.73	239.922	297.851	160.009
	6.62029	5.30755	4.69736	2.11411	4.12655	5.30755	3.39047		392.589	316.157	277.461	293.413	242.92	316.157	202.64
	6.43813	5.00068	5.43716	1.40953	4.03263	5.00068	3.30422		381.572	297.878	321.159	304.891	236.719	297.878	196.824
	5.15084	1.34431	3.8682	3.99519	0.681846	1.34431	4.0114		304.247	80.0772	230.032	329.431	39.2976	80.0772	238.949
	5.51616	3.66565	5.38542	3.61735	0.90918	3.66565	4.60033		325.458	218.353	320.257	383.697	47.3993	218.353	272.343
	5.38101	6.33795	4.88204	4.65754	1.13528	6.33795	3.81313		303.852	377.536	289.183	375.149	67.3606	377.536	225.741
	4.90675	3.94234	2.93511	4.934	1.40153	3.94234	2.81231		290.974	234.835	174.544	347.812	82.5048	234.835	166.491
	5.14066	4.91783	4.15793	5.16465	1.05261	4.91783	1.98431		304.674	292.943	237.698	382.634	62.1751	292.943	115.687
	2.5944	3.40301	2.70347	5.93561	5.85298	3.40301	4.5516		153.245	201.802	160.769	187.303	337.332	201.802	269.459
	4.37985	4.01516	4.15431	6.54765	6.0121	4.01516	5.12566		258.415	238.102	246.493	206.322	313.435	238.102	303.443
	2.85998	2.9561	2.20928	6.33689	8.63044	2.9561	3.54615		161.496	175.299	131.381	197.617	512.08	175.299	209.935
	3.40607	1.51528	4.34684	5.86192	8.2978	1.51528	4.31173		201.983	89.8574	258.496	214.879	488.471	89.8574	255.258
	3.29686	4.96014	4.29115	6.48156	7.36735	4.96014	4.593		195.397	294.14	255.184	207.28	435.171	294.14	273.287
	3.25132	4.02824	3.77139	3.31896	5.50626	4.02824	5.08702		192.047	238.878	224.652	367.648	317.349	238.878	302.343
	4.3487	4.04498	2.17945	3.56954	5.25245	4.04498	3.05694		256.577	239.871	129.825	332.706	273.832	239.871	181.891
	3.54323	2.06057	6.28079	3.45278	5.17903	2.06057	5.57668		200.077	122.194	374.131	226.872	307.293	122.194	331.817
	5.0745	3.56118	4.61513	3.65021	5.26645	3.56118	1.99866		300.922	211.181	274.912	143.79	310.023	211.181	118.922
	4.61755	2.91445	4.59055	3.5432	4.67759	2.91445	2.63845		273.67	172.829	261.206	155.938	276.293	172.829	156.99
	4.87581	3.61804	6.10685	3.56025	4.74129	3.61804	2.0966		288.002	214.553	347.485	270.188	273.26	214.553	124.749
	4.74476	3.20981	3.57488	2.88019	2.45219	3.20981	2.44117		279.944	190.345	203.414	323.474	127.842	190.345	145.252
	5.48646	4.39131	5.17657	3.04047	2.20806	4.39131	3.23559		309.806	262.458	294.551	377.185	131.014	262.458	192.52
	4.50922	5.97738	3.66076	3.37197	2.27407	5.97738	2.82105		267.4	357.253	208.3	368.308	133.869	357.253	168.607
	3.86524	5.82102	2.90263	2.96193	1.1828	5.82102	4.17838		229.083	347.908	165.162	323.706	69.8652	347.908	249.732
	6.10925	3.48785	1.91375	4.53837	6.18488	3.48785	4.93295		360.858	208.46	108.894	168.123	356.46	208.46	290.884
	4.81404	6.48665	3.56365	5.43037	6.69385	6.48665	2.52035		284.032	387.691	202.774	221.883	348.978	387.691	148.619
	4.54032	3.65269	3.09855	6.32851	6.63093	3.65269	2.88575		256.38	218.312	176.31	227.186	393.44	218.312	170.165
	6.05032	3.99683	5.22042	6.16578	7.20208	3.99683	4.32088		358.789	238.88	297.046	301.853	423.968	238.88	253.639
	6.4283	5.19703	4.998	5.46178	8.00906	5.19703	4.91244		380.99	310.614	284.39	323.866	473.075	310.614	289.674
	5.91355	2.07823	3.98242	2.82398	4.62444	2.07823	4.98865		349.299	122.894	238.152	242.549	266.526	122.894	294.168
	6.09278	5.23679	4.22122	3.72489	5.01566	5.23679	3.15301		359.479	309.673	251.166	255.902	261.487	309.673	185.925
	5.72992	3.04942	4.55364	3.8118	5.66816	3.04942	3.95484		323.554	180.325	272.311	262.206	336.315	180.325	233.207
	6.20574	4.88245	2.37491	5.05326	7.11385	4.88245	2.87788		368.005	288.72	142.022	241.188	418.774	288.72	171.236
	6.29885	4.44224	3.61469	5.46447	6.60313	4.44224	5.12895		373.317	262.688	216.162	238.562	390.03	262.688	305.177
	3.09991	4.24304	2.73104	4.07411	0.347424	4.24304	3.76528		183.104	250.908	163.319	226.012	20.0235	250.908	224.037
	3.42822	4.1976	4.11479	4.29601	1.56088	4.1976	4.39958		202.268	248.221	244.285	272.616	81.3751	248.221	261.779
	3.45244	2.76401	4.33672	4.39937	1.13995	2.76401	3.69922		194.951	163.447	259.339	375.931	67.6382	163.447	220.107
	3.81208	4.47529	3.92539	4.03768	1.49396	4.47529	3.24657		226.06	264.642	234.741	410.579	87.9458	264.642	193.174
	3.66586	3.6234	3.9905	4.02517	2.21223	3.6234	2.48304		217.267	214.266	238.635	295.348	130.671	214.266	147.743
	3.68129	4.39961	5.45056	3.79635	4.51352	4.39961	3.25713		217.445	260.167	325.766	141.265	260.133	260.167	193.802
	4.13512	5.48953	4.23537	4.57658	4.82148	5.48953	3.35135		243.975	324.619	253.137	100.73	243.809	324.619	199.408
	3.9532	4.66087	5.55196	6.30748	5.0314	4.66087	3.81297		223.227	274.374	331.827	121.926	291.49	274.374	227.256
	4.15675	5.57996	4.20975	6.87343	5.65105	5.57996	3.56338		246.499	328.478	251.606	234.922	331.721	328.478	212.38
	4.399	5.14289	5.33616	4.9833	4.29951	5.14289	5.26935		260.718	302.749	310.925	321.31	249.662	302.749	288.062
	3.87431	1.81251	3.65568	2.37284	4.56824	1.81251	2.12045		228.845	106.577	213.007	350.297	263.286	106.577	115.919
	4.58941	3.5525	2.52827	1.69102	4.12541	3.5525	3.51653		270.779	209.127	147.316	393.214	215.075	209.127	192.24
	5.57543	4.49567	5.91815	2.04571	4.17725	4.49567	3.9867		314.83	264.649	344.835	400.609	247.853	264.649	217.145
	5.12764	4.35927	3.91403	3.93279	4.02565	4.35927	5.16769		304.074	256.619	228.061	404.657	236.98	256.619	282.504
	4.85749	5.02422	2.65286	5.42136	4.29881	5.02422	4.60177		287.891	295.763	154.575	421.395	253.92	295.763	251.567
	2.44526	3.21373	3.43245	5.88397	3.64034	3.21373	3.01552		144.517	189.72	200	208.757	205.075	189.72	164.851
	3.49813	4.39345	4.2759	6.60115	3.03591	4.39345	3.20745		196.715	259.071	249.146	146.742	158.274	259.071	175.343
	2.90792	3.75028	3.62899	6.72153	3.30234	3.75028	2.50416		172.83	221.394	211.452	164.414	195.941	221.394	149.333
	3.36361	2.57501	5.1196	6.7743	2.09625	2.57501	3.79103		199.689	152.014	298.307	136.022	123.401	152.014	226.075
	1.57833	4.45914	4.77191	7.11006	3.17989	4.45914	2.98819		93.7011	263.242	278.047	153.94	187.828	263.242	178.198
		5.1952	4.45927	3.50651	11.6143	5.1952	4.58084			306.695	265.627	204.222	174.992	306.695	273.174
		4.16674	5.28736	2.46346	3.84061	4.16674	2.60844			245.98	314.955	283.998	200.867	245.98	155.552
		2.83051	4.00746	2.75859	2.45135	2.83051	2.47982			167.096	238.715	191.528	146.021	167.096	147.882
		3.57754	4.35557	2.27713	2.03251	3.57754	3.07713			211.197	259.16	171.491	120.53	211.197	183.502
		3.93723	3.30881	2.59738	1.78399	3.93723	3.08479			232.431	197.097	168.507	104.9	232.431	183.959
		3.90546	2.46092	3.43033	4.16817	3.90546	3.37257			230.556	146.591	351.405	197.296	230.556	201.12
		1.55567	4.72499	4.76767	3.00352	1.55567	2.09274			91.8375	275.943	376.318	177.911	91.8375	125.008
		5.13702	4.88257	3.21351	3.45681	5.13702	3.91585			303.089	290.842	316.599	205.914	303.089	233.91
		5.62744	4.04174	2.87091	3.79216	5.62744	5.18099			332.023	240.756	304.757	224.878	332.023	303.783
		5.16628	4.29736	2.84316	5.15755	5.16628	2.51431			304.815	255.983	297.962	303.268	304.815	147.425
		2.56967	5.75744	5.90257	1.08676	2.56967	2.43292			151.613	338.926	342.087	51.4406	151.613	142.652
		6.77109	4.514	6.3175	2.66792	6.77109	3.59561			399.5	265.728	339.08	158.032	399.5	210.826
		3.07958	4.62472	5.31198	2.85126	3.07958	4.69532			181.698	272.245	383.398	169.842	181.698	275.306
		4.59031	5.17064	5.10189	1.83924	4.59031	4.83671			270.832	304.383	373.6	109.068	270.832	283.597
		5.21192	5.07226	5.02741	1.55385	5.21192	3.61519			307.508	299.437	376.529	91.3674	307.508	211.974
		2.80589	2.75464	5.74606	4.04453	2.80589	3.57411			166.485	162.618	179.365	191.444	166.485	209.565
		3.3647	3.12101	5.69236	3.81309	3.3647	2.91056			199.641	184.246	256.591	225.865	199.641	173.181
		2.5959	5.47098	6.43276	4.56405	2.5959	5.15635			154.025	322.975	295.835	271.869	154.025	306.119
		2.82321	2.66796	6.25438	4.3555	2.82321	2.60377			167.513	157.5	366.214	258.285	167.513	154.927
		5.12346	3.73437	6.35305	4.87375	5.12346	4.20929			303.997	220.455	329.993	286.58	303.997	250.456
		2.51776	3.16688	3.0128	1.3479	2.51776	1.66018			149.389	186.954	293.296	63.8015	149.389	98.782
		4.839	3.46833	4.30756	1.43991	4.839	2.23536			287.118	204.75	336.157	85.2918	287.118	133.006
		3.10756	4.11938	4.96361	1.47281	3.10756	2.56864			184.385	243.184	308.891	87.7318	184.385	152.836
		4.50185	5.68557	6.13073	0.8841	4.50185	2.91018			267.114	335.643	307.053	52.4279	267.114	173.158
		4.09703	5.10701	5.63441	0.701385	4.09703	3.066			243.094	301.488	306.49	41.242	243.094	182.43
		5.90062	4.51459	4.92652	0.310492	5.90062	2.27314			350.108	269.525	207.734	14.6968	350.108	128.207
		2.25668	5.25497	5.6433	0.300454	2.25668	3.24351			133.898	314.077	252.736	17.7972	133.898	182.937
		4.6527	4.18119	5.18266	0.330432	4.6527	4.55731			277.305	249.063	240.696	19.683	277.305	270.1
		5.18836	3.29974	5.14033	0.354144	5.18836	2.36989			309.231	197.217	212.233	21.0011	309.231	140.458
		4.87872	4.94559	5.1713	0.557156	4.87872	4.77054			290.776	283.716	162.626	32.7612	290.776	282.738
		2.87102	2.33886	3.49128	1.62819	2.87102	2.47988			171.115	139.788	262.572	77.0689	171.115	146.976
		5.21275	4.28334	4.26912	2.06535	5.21275	4.55279			310.684	256.005	231.194	122.339	310.684	269.832
		2.48055	3.70343	4.05434	2.09196	2.48055	4.28532			147.843	221.345	289.423	124.613	147.843	253.98
		3.91774	3.98377	3.58698	2.16672	3.91774	3.40459			233.5	238.1	295.173	128.488	233.5	201.782
		4.40602	4.38835	2.74548	1.30706	4.40602	4.11345			262.602	262.281	279.472	76.8561	262.602	243.794
		3.07964	5.11034	4.41291	3.72499	3.07964	3.81178			182.831	301.514	9.09144	176.319	182.831	226.423
		3.64995	1.25871	3.90524	1.03929	3.64995	3.75393			216.689	74.2649	12.6401	61.5614	216.689	222.986
		2.56185	5.3564	4.87511	0.12194	2.56185	2.49978			152.09	316.032	12.3762	7.26365	152.09	148.489
		1.1936	4.9371	4.98878	0.553549	1.1936	3.935			70.8612	291.293	26.5331	32.8259	70.8612	233.742
		5.62688	5.11646	4.71808	2.48827	5.62688	2.14362			331.803	301.364	14.6248	146.312	331.803	127.333
		3.89728	1.84098	0.152795	2.50363	3.89728	4.12368			231.372	108.435	121.535	118.507	231.372	244.95
		4.02098	3.92179	0.213511	3.04938	4.02098	2.22686			238.715	230.996	102.008	180.627	238.715	132.277
		3.48193	6.24426	0.208468	3.40529	3.48193	3.67494			206.713	367.792	106.114	202.844	206.713	218.295
		3.57805	3.88215	0.448441	4.4839	3.57805	3.72916			212.42	228.662	72.1661	265.899	212.42	221.515
		3.09641	4.37278	0.246899	4.71164	3.09641	2.65992			183.826	257.56	63.2711	277.049	183.826	158.445
		3.64668	2.81825	2.04258	4.01609	3.64668	4.07175			216.494	165.997	342.58	238.425	216.494	242.544
		3.60124	2.58826	1.72309	3.94531	3.60124	4.69877			213.797	152.451	419.553	233.303	213.797	278.327
		5.38999	4.22818	1.78741	4.18777	5.38999	2.07602			301.484	249.043	443.57	248.338	301.484	122.971
		5.2119	5.48172	1.21969	4.39495	5.2119	4.06194			291.523	322.878	371.221	260.771	291.523	240.605
		4.5362	5.48353	1.06815	4.25414	4.5362	3.56432			252.821	322.984	410.295	250.147	252.821	211.129
		2.29091	3.87561	5.75756	4.04672	2.29091	4.45862			128.14	230.99	185.78	240.243	128.14	264.103
		1.95961	5.84552	7.08696	5.56962	1.95961	3.72065			109.609	348.397	280.161	329.355	109.609	220.389
		5.28602	4.86099	7.4842	5.97218	5.28602	4.21807			295.669	289.395	251.688	354.155	295.669	249.854
		3.40653	3.47409	6.27406	4.95041	3.40653	4.00122			190.541	207.059	174.249	293.728	190.541	237.009
		5.33752	4.89728	6.94621	5.61677	5.33752	3.82151			298.55	291.882	226.59	330.271	298.55	226.364
		3.4011	3.60333	3.12231	3.1387	3.4011	4.26893			201.121	214.762	159.311	186.337	201.121	252.297
		4.94998	4.54586	4.73238	2.83894	4.94998	2.54915			292.713	265.785	293.047	167.878	292.713	150.997
		3.399	4.46962	4.23949	4.22867	3.399	4.01489			200.997	266.393	304.853	250.764	200.997	237.819
		1.4442	4.32156	2.94502	3.48602	1.4442	1.59578			85.4015	257.568	312.164	206.84	85.4015	94.5249
		5.35422	4.29403	3.82533	3.38064	5.35422	3.07153			316.617	255.928	346.89	198.784	316.617	181.939
		4.39653	4.99606	2.67746	3.54764	4.39653	3.15415			259.985	297.77	176.421	204.82	259.985	175.373
		4.62908	1.82544	4.95006	3.96492	4.62908	1.2759			273.736	108.798	251.598	229.175	273.736	75.5771
		5.96231	5.49722	5.13501	4.01004	5.96231	2.50941			352.576	327.639	332.347	230.848	352.576	148.643
		4.00079	4.88824	5.27595	4.13338	4.00079	4.03284			236.584	291.343	260.366	245.113	236.584	240.63
		3.94653	4.69078	5.85625	4.33255	3.94653	4.01809			233.375	278.324	401.784	256.202	233.375	239.75
		3.90309	2.37205	2.96502	2.0865	3.90309	3.96606			230.806	140.744	239.032	123.453	230.806	231.754
		2.18396	1.37516	4.2499	1.44216	2.18396	2.05879			129.147	81.5942	277.003	85.5215	129.147	120.304
		4.74825	4.95405	5.59812	3.62323	4.74825	4.05413			282.05	293.945	253.538	215.827	282.05	236.9
		6.0837	2.57888	4.4005	4.93753	6.0837	2.81728			361.377	153.016	188.867	294.116	361.377	163.968
		4.52635	4.73768	6.78299	3.15029	4.52635	4.68136			268.869	281.106	350.255	187.235	268.869	273.551
		3.68216	3.41493	4.01729	5.97179	3.68216	4.30672			218.724	202.622	203.786	353.336	218.724	251.66
		4.50549	2.37631	4.67903	6.12873	4.50549	4.0661			267.63	140.996	253.875	363.438	267.63	237.599
		6.16935	5.23623	4.27065	6.34204	6.16935	4.40013			366.464	310.687	191.169	377.78	366.464	257.118
		4.11538	5.48256	3.19208	6.21154	4.11538	3.37197			244.457	325.303	98.0857	370.006	244.457	199.399
		4.33133	5.60384	5.91306	7.49227	4.33133	5.66628			257.285	332.499	109.969	445.296	257.285	333.937
		2.45412	4.02976	3.42494	5.62931	2.45412	2.7837			145.122	240.714	182.909	333.072	145.122	164.612
		5.10739	5.6431	4.28838	5.17027	5.10739	4.25252			302.021	334.264	183.096	306.601	302.021	251.469
		3.5951	5.18497	3.22009	4.88267	3.5951	1.47701			212.593	309.72	205.862	290.848	212.593	87.342
		1.1272	3.86424	1.65776	5.10952	1.1272	3.28077			66.6557	230.827	213.609	304.362	66.6557	194.006
		5.08908	4.19633	1.85652	4.99706	5.08908	3.0861			300.938	250.664	218.974	296.996	300.938	180.951
		4.28551	2.02996	3.07405	4.16898	4.28551	1.13356			253.42	121.258	387.527	246.668	253.42	67.0321
		4.89279	4.98809	3.0928	0.170591	4.89279	3.36203			289.331	296.296	399.31	10.1162	289.331	198.811
		4.42124	2.95279	3.46758	0.220775	4.42124	1.55394			261.446	176.382	409.567	13.1511	261.446	92.5643
		4.60544	4.09109	3.61024	0.11579	4.60544	4.07078			272.339	244.378	357.608	6.89733	272.339	242.486
		4.51044	4.38299	3.69674	0.535398	4.51044	4.84536			266.721	261.814	342.094	31.821	266.721	283.942
		2.21153	4.80748	6.54597	6.2775	2.21153	2.37488			130.777	268.902	255.068	371.424	130.777	139.17
		4.5566	3.15842	6.91636	9.43166	4.5566	4.10811			269.451	176.663	219.328	559.305	269.451	240.739
		4.81963	4.58694	7.06953	8.72983	4.81963	2.75593			286.13	256.566	236.805	520.014	286.13	160.397
		5.73207	5.37336	6.044	10.5307	5.73207	4.63662			340.299	300.554	243.115	626.586	340.299	271.71
		4.49942	4.50005	5.77528	10.4956	4.49942	4.82674			267.119	267.157	237.734	623.799	267.119	282.851
		1.97608	2.47593	4.29642	5.76248	1.97608	3.77104			117.315	146.99	168.521	340.952	117.315	220.986
		5.69974	3.04468	3.72158	7.38229	5.69974	4.38865			338.379	180.755	170.606	437.776	338.379	257.179
		4.05634	1.63578	3.99328	6.5876	4.05634	3.57052			240.815	97.1124	181.113	392.407	240.815	199.238
		4.39528	3.22598	4.09739	7.7095	4.39528	5.2883			260.937	191.518	199.961	459.236	260.937	295.091
		4.77573	2.38786	4.04304	7.15259	4.77573	2.91707			283.523	141.762	174.164	425.108	283.523	162.775
		3.99183	2.95622	2.50863	0.832187	3.99183	4.19585			218.888	175.504	343.298	49.2383	218.888	234.132
		5.29842	2.61123	2.73436	1.22718	5.29842	2.21383			290.534	155.022	313.327	72.7731	290.534	123.533
		4.12465	3.14255	2.86904	0.043822	4.12465	3.40691			226.171	186.565	335.331	2.61036	226.171	190.108
		1.53226	4.81119	3.01283	0.028842	1.53226	2.78484			84.0203	285.628	355.328	1.71807	84.0203	152.333
		4.478	4.84059	3.84304	0.021531	4.478	2.36173			245.547	287.374	307.107	1.27971	245.547	131.786
		4.31923	3.04575	5.7826	2.29075	4.31923	3.33871			236.841	171.782	265.903	135.538	236.841	186.303
		5.20597	4.74676	5.28963	2.81862	5.20597	2.43798			285.465	267.721	338.8	167.146	285.465	145.306
		3.8602	3.55363	5.67709	4.96809	3.8602	3.49428			211.67	200.427	328.968	291.466	211.67	208.262
		4.07754	3.56757	6.00885	4.61766	4.07754	4.89586			223.588	201.214	307.228	248.587	223.588	288.86
		6.73285	3.89737	5.36893	4.02006	6.73285	3.89363			369.19	219.815	376.523	230.084	369.19	229.727
		3.83293	4.64617	4.47893	4.42662	3.83293	3.29942			210.175	262.047	246.843	261.912	210.175	194.668
		3.32955	4.79655	5.71968	3.85209	3.32955	1.34916			182.573	263.014	246.544	228.433	182.573	79.3768
		5.2103	4.14444	5.56936	3.72393	5.2103	5.01842			309.844	233.75	261.685	221.825	309.844	296.091
		5.41213	4.22909	5.19544	4.38749	5.41213	4.83757			321.846	237.678	261.241	261.352	321.846	285.42
		6.32625	3.1653	6.58248	3.83475	6.32625	3.80587			376.206	178.525	230.798	227.915	376.206	224.549
		1.42192	4.86312	4.15787	3.69623	1.42192	4.54275			84.5581	288.873	257.169	210.565	84.5581	268.026
		6.03208	2.87087	4.16219	3.13473	6.03208	3.79448			358.712	170.532	339.588	185.892	358.712	225.269
		5.06622	5.29002	4.43027	3.07145	5.06622	4.58059			301.276	314.231	348.112	182.959	301.276	271.328
		4.03811	3.85603	4.41776	2.67242	4.03811	2.62558			240.136	229.051	374.57	159.19	240.136	155.874
		4.80802	5.03744	4.03487	3.58304	4.80802	4.45676			285.921	297.885	342.274	212.477	285.921	264.587
		3.3324	2.58752	4.33181	2.42604	3.3324	0.983682			196.392	153.011	134.237	143.947	196.392	58.3988
		5.56506	3.03993	5.73298	2.06975	5.56506	2.87344			327.972	179.764	159.621	123.151	327.972	170.589
		2.40746	5.24794	5.89346	2.61742	2.40746	3.24137			141.882	310.333	196.806	154.779	141.882	189.623
		1.04008	3.56307	6.33424	1.76704	1.04008	2.93374			61.2963	210.699	295.21	105.023	61.2963	174.169
		4.47538	3.30357	5.98372	1.71423	4.47538	3.17709			263.753	195.354	363.393	101.884	263.753	188.616
		3.92082	3.49021	2.26111	2.49927	3.92082				231.07	206.391	252.524	148.292	231.07
		4.77186	4.77309	2.69474	2.0844	4.77186				281.226	282.253	257.967	124.023	281.226
		5.23348	3.70766	3.33189	2.17549	5.23348				308.431	219.25	259.115	128.645	308.431
		3.65454	4.29026	4.99221	2.55925	3.65454				215.377	253.701	318.588	152.107	215.377
		6.09373	5.72465	6.35294	1.97441	6.09373				359.129	338.523	292.257	117.348	359.129
		3.92813	4.12084	4.25358	1.83493	3.92813				231.501	245.468	163.272	108.874	231.501
		3.23103	4.54381	4.35504	1.89709	3.23103				190.418	270.361	232.834	112.878	190.418
		4.5438	4.60524	4.38676	1.45227	4.5438				268.997	274.323	188.663	85.8786	268.997
		4.9938	3.68109	5.38755	1.23137	4.9938				295.637	219.274	211.855	73.1853	295.637
		5.65756	4.29266	5.10931	0.749739	5.65756				334.932	255.703	160.976	44.5601	334.932
		2.59751	2.94447	2.75018	4.49999	2.59751				153.169	175.395	211.924	244.203	153.169
		3.98281	4.60382	3.93074	4.91721	3.98281				235.786	274.238	148.938	292.578	235.786
		4.01726	4.10007	3.19402	5.01013	4.01726				237.825	244.231	167.607	296.27	237.825
		3.99514	5.31921	3.58261	5.02171	3.99514				236.516	316.852	238.537	292.937	236.516
		4.48664	4.80797	2.81422	5.17375	4.48664				265.613	286.399	133.902	306.808	265.613
			5.09439	3.5697	0.699055						302.441	239.486	41.4779
			4.7511	2.51439	0.580169						282.061	333.829	34.5205
			4.92502	2.83754	0.819949						292.386	316.033	48.487
			4.05253	4.03383	0.679342						240.588	332.118	40.3762
			5.25865	2.34091	1.45199						312.543	322.543	86.2977
			4.17922	4.03397	0.436513						248.388	402.429	25.9002
			3.82558	5.63575	0.373325						227.371	395.636	22.2132
			5.29751	5.35038	0.413688						314.853	390.427	24.463
			2.54272	5.61634	0.497877						151.125	354.571	29.591
			4.46249	5.63879	0.397162						265.224	377.956	23.605
			3.24763	6.77861	1.60564						193.02	322.464	95.2691
			4.46636	6.67918	1.19191						265.454	286.898	70.9195
			3.5006	6.60984	1.57358						208.056	322.303	93.0522
			4.9687	5.99604	2.16897						295.311	492.492	128.911
			5.51761	6.60753	2.13975						327.935	343.746	127.174
			4.2621	5.43165	2.43878						254.309	261.656	144.703
			4.47736	4.84345	1.58469						267.153	306.519	94.2901
			4.7727	5.45653	2.00247						284.775	331.781	118.415
			2.6477	8.49598	3.62452						157.981	310.797	215.42
			4.18969	6.05179	4.97298						249.989	278.184	295.565
			3.56624	4.4074	4.16376						212.789	167.756	247.053
			4.32029	5.17469	4.51967						252.453	203.361	268.924
			4.24754	5.61698	4.40894						253.44	185.284	260.719
			4.77043	5.2558	5.35772						284.64	180.237	318.431
			4.90109	4.86328	6.43689						292.436	176.516	378.495
			4.73451	2.82573	3.77793						281.549	239.845	224.286
			1.26092	3.46044	3.53395						74.9839	250.099	209.802
			5.41217	3.24108	4.16672						321.848	251.35	246.257
			4.23078	3.03255	3.97015						251.594	233.579	233.58
			4.91602	2.97161	3.98396						292.344	257.575	236.252
			3.70875	4.04001	5.09391						220.55	13.1276	302.413
			4.4212	4.25573	5.44762						262.918	26.9557	323.411
			4.98623	4.39673	4.77531						296.519	18.8003	282.225
			2.77014	3.93004	5.44526						164.733	30.4468	323.453
			4.07891	4.33622	5.01255						242.563	31.1214	297.249
			2.90675	0.221125	3.8663						172.857	58.7152	229.533
			6.17799	0.458684	3.3821						367.39	91.7642	200.787
			5.28243	0.328863	3.07669						314.133	50.1992	181.835
			4.67113	0.512276	3.19034						277.78	64.5729	189.509
			5.02531	0.523922	2.79838						298.843	30.8705	165.946
			3.95117	0.989013	3.39186						235.361	297.25	200.914
			5.92184	1.56148	3.35205						352.749	349.535	196.656
			4.24311	0.878107	3.23013						252.751	372.227	190.688
			3.49274	1.08646	3.84868						208.054	376.957	226.947
			4.35922	0.519699	3.99886						254.146	396.028	235.936
			3.30463	5.00696							196.849	250.847
			3.69333	5.94777							218.525	171.241
			3.81983	6.51117							227.538	228.85
			4.42799	6.34242							263.764	240.067
			4.5436	6.66704							270.651	226.786
			4.77135	4.22532							282.468	324.142
			2.91427	2.91387							172.527	298.605
			5.76154	4.00314							341.088	281.295
			4.30188	4.03921							254.675	333.7
			4.69789	3.8179							277.649	294.94
			3.92123	5.45993							231.748	221.152
			2.91993	5.08113							172.57	228.582
			4.8789	4.92053							288.347	271.585
			2.26695	5.61461							133.978	333.598
			2.35024	4.96525							138.901	397.875
			3.94642	3.72513							233.237	330.475
			6.00341	3.8896							354.806	360.6
			3.7965	4.75068							224.376	339.069
			4.27344	5.6129							252.564	354.952
			4.81224	6.69814							284.407	361.365
			3.50242	5.56659							208.747	99.0255
			6.25605	6.13605							372.866	121.888
			4.35701	5.93115							258.375	102.31
			1.82116	5.9722							108.543	138.638
			4.29426	6.08351							245.063	148.028
			3.47489	1.66801							207.106	279.411
			3.83432	2.07407							227.25	205.83
			3.71092	1.78965							221.174	192.522
			4.19889	2.33263							250.257	220.058
			3.90844	2.49202							232.946	228.019
				4.70646								363.704
				3.50244								367.272
				3.36768								330.242
				3.70255								332.364
				3.83865								355.342
				6.12631								224.411
				6.24958								238.614
				6.13825								239.624
				5.77346								238.19
				6.16549								241.968
				3.79281								148.848
				4.01928								162.696
				4.09607								169.659
				4.01438								179.065
				4.08495								228.408

## Sheet: Figure 6
Figure 6: Analysis of survival
Endurance 6D			Hypertrophy 6C				Strength 6B				Power 6A
Data Summary	no NMES	End		Data Summary	No NMES	Hypertrophy		Data Summary	No NMES	Strength		Data Summary	No NMES	Power
Number of rows	85	85		Number of rows	69	69		Number of rows	119	119		Number of rows	70	70
# of blank lines	53	48		# of blank lines	32	37		# of blank lines	56	64		# of blank lines	33	38
# rows with impossible data	0	0		# rows with impossible data	0	0		# rows with impossible data	0	0		# rows with impossible data	0	0
# censored subjects	0	0		# censored subjects	0	0		# censored subjects	0	0		# censored subjects	0	0
# deaths/events	32	37		# deaths/events	37	32		# deaths/events	63	55		# deaths/events	37	32
Median survival	11	12		Median survival	13	13		Median survival	13	14		Median survival	13	14
							Comparison of Survival Curves				Comparison of Survival Curves
Comparison of Survival Curves			Comparison of Survival Curves
							Log-rank (Mantel-Cox) test				Log-rank (Mantel-Cox) test
Log-rank (Mantel-Cox) test (recommended)			Log-rank (Mantel-Cox) test				Chi square	12.42			Chi square	4.161
Chi square	36.84		Chi square	0.1715			df	1			df	1
df	2		df	1			P value	0.0004			P value	0.0414
P value	<0.0001		P value	0.6788			P value summary	***			P value summary	*
P value summary	****		P value summary	ns			Are the survival curves sig different?	Yes			Are the survival curves sig different?	Yes
Are the survival curves sig different?	Yes		Are the survival curves sig different?	No
							Gehan-Breslow-Wilcoxon test				Gehan-Breslow-Wilcoxon test
Logrank test for trend (recommended)			Gehan-Breslow-Wilcoxon test				Chi square	13.13			Chi square	3.06
Chi square	33.53		Chi square	0.1793			df	1			df	1
df	1		df	1			P value	0.0003			P value	0.0802
P value	<0.0001		P value	0.672			P value summary	***			P value summary	ns
P value summary	****		P value summary	ns			Are the survival curves sig different?	Yes			Are the survival curves sig different?	No
Sig. trend?	Yes		Are the survival curves sig different?	No
							Median survival				Median survival
Gehan-Breslow-Wilcoxon test			Median survival				No NMES	13			No NMES	13
Chi square	26.14		No NMES	13			Strength	14			Power	14
df	2		Hypertrophy	13			Ratio (and its reciprocal)	0.9286	1.077		Ratio (and its reciprocal)	0.9286	1.077
P value	<0.0001		Ratio (and its reciprocal)	1	1		95% CI of ratio	0.6467 to 1.333	0.7501 to 1.546		95% CI of ratio	0.5785 to 1.490	0.6710 to 1.729
P value summary	****		95% CI of ratio	0.6230 to 1.605	0.6230 to 1.605
Are the survival curves sig different?	Yes						Hazard Ratio (Mantel-Haenszel)	A/B	B/A		Hazard Ratio (Mantel-Haenszel)	A/B	B/A
			Hazard Ratio (Mantel-Haenszel)	A/B	B/A		Ratio (and its reciprocal)	2.386	0.4191		Ratio (and its reciprocal)	1.953	0.5121
			Ratio (and its reciprocal)	1.141	0.8766		95% CI of ratio	1.471 to 3.870	0.2584 to 0.6798		95% CI of ratio	1.027 to 3.714	0.2692 to 0.9741
			95% CI of ratio	0.6117 to 2.127	0.4701 to 1.635
							Hazard Ratio (logrank)	A/B	B/A		Hazard Ratio (logrank)	A/B	B/A
			Hazard Ratio (logrank)	A/B	B/A		Ratio (and its reciprocal)	1.629	0.6139		Ratio (and its reciprocal)	1.436	0.6966
			Ratio (and its reciprocal)	1.079	0.9271		95% CI of ratio	1.129 to 2.350	0.4256 to 0.8857		95% CI of ratio	0.8931 to 2.308	0.4333 to 1.120
			95% CI of ratio	0.6727 to 1.730	0.5782 to 1.487

## Sheet: Figure 7
Sarcomere Distance			Nuclei volume			Nuclei surface area			Nuclei filament index
Fig 7 B4			Fig 7 C4			Fig 7 C5			Fig 7 C6
No NMES	END	Sibling	No NMES	END	Sibling	No NMES	END	Sibling	Sibling	No NMES	END
1.5	1.66052	1.82726	130.709	208.217	7.851	235.116	350.638	34.792	2.15497	2.32364	1.63975
1.66667	1.66052	1.84468	4.586	20.485	34.089	23.83	78.387	134.456	1.76116	1.79463	2.36374
1.5	1.66052	1.84468	56.411	29.352	13.842	160.132	81.855	58.509	1.92747	1.30364	1.75395
1.5	1.66052	1.84468	47.544	221.211	72.516	152.924	341.639	188.588	1.86969	1.1578	4.23266
1.66667	1.66052	1.84468	12.23	18.651	2.686	64.041	62.377	16.859	1.37151	3.37651	2.64406
1.66667	1.66052	1.82726	182.839	199.044	30.576	376.038	392.757	95.617	2.29967	2.37754	1.31058
1.66667	1.66052	1.84468	9.937	7.338	3.099	42.793	30.933	15.867	2.17634	1.21048	5.264
1.66667	1.32842	1.84468	1.682	6.879	4.132	11.659	33.755	20.164	1.62464	1.89701	1.43367
1.66667	1.99263	1.84468	1005.46	206.382	3.099	2091.08	346.111	15.289	4.64396	2.32727	1.11747
1.5	1.66052	1.84468	1.682	490.884	6.818	9.619	790.766	27.272	1.36324	1.83189	1.34483
1.33333	1.32842	1.82726	259.583	6.421	2.479	559.141	28.146	12.231	3.19819	2.07095	0.983625
1.33333	1.99263	1.84468	3.669	83.776	8.264	20.632	262.841	34.709	1.39998	1.43837	1.46834
1.66667	1.66052	1.84468	3.21	22.778	2.686	14.241	68.051	13.553	2.97754	1.69352	1.48707
1.33333	1.99263	1.84468	17.428	7.644	4.132	59.881	36.031	18.264	0.796761	1.80294	3.01688
1.66667	1.32842	1.84468	3.363	422.09	8.884	16.111	711.126	35.04	1.66198	1.54564	4.30754
1.5	1.66052	1.82726	150.277	3.363	26.858	378.239	20.973	81.899	1.15272	1.6295	1.9221
1.5	1.99263	1.84468	1.529	158.532	23.552	10.095	298.457	81.65	2.34668	2.90626	1.4123
1.33333	1.32842	1.84468	139.575	3.058	4.339	321.36	16.316	21.404	1.94083	2.72714	3.37296
1.33333	1.99263	1.84468	1.987	35.62	5.165	10.231	94.938	21.239	1.13423	1.93599	1.71302
1.66667	1.66052	1.82726	1.987	1.987	2.273	11.013	11.965	11.818	1.96172	1.93903	1.3105
1.5	1.66052	1.84468	121.995	77.202	11.363	292.833	221.692	42.726	2.63734	4.05039	2.52252
1.5	1.66052	1.84468	9.937	3.822	2.479	45.955	20.02	13.14	2.14345	1.1586	2.39676
1.5	1.32842	1.84468	12.842	15.288	9.09	58.221	52.517	40.411	1.32859	1.10008	2.40094
1.5	1.66052	1.84468	158.532	254.691	3.099	339.265	404.107	15.289	1.77191	3.0711	2.62499
1.66667	1.66052	1.82726	6.574	20.638	35.328	34.261	72.537	129.581	3.10124	1.96361	4.81546
1.5	1.66052	1.84468	154.099	26.753	115.488	270	78.352	267.261	1.60627	4.2618	4.25968
1.33333	1.99262	1.84468	364.608	60.233	42.559	811.178	183.997	145.861	2.34116	2.34381	3.63781
1.66667	1.66052	1.84468	26.6	273.036	7.024	102.538	437.059	36.61	2.74091	1.22618	1.38034
1.5	1.66052	1.84468	166.482	5.198	103.092	324.447	24.406	209.743	2.11938	1.79219	2.64221
1.83333	1.99262	1.84468	3.822	137.588	3.719	19.544	315.202	20.164	2.4126	2.9221	3.21325
1.66667	1.99262	1.84468	79.801	1.529	86.977	218.51	10.095	248.914	1.92623	3.92849	1.04058
1.33333	1.66052	1.82726	155.627	202.407	2.066	352.068	361.139	13.223	1.86992	1.57282	3.61992
1.33333	1.66052	1.84468	7.338	3.21	21.899	45.173	19.103	91.814	1.14363	2.97514	5.96869
1.33333	1.66052	1.84468	9.173	5.504	102.059	46.602	27.975	203.296	1.47242	3.29141	2.85758
1.66667	1.66052	1.84468	137.282	3.21	79.746	364.108	20.361	247.015	1.73839	1.09613	4.35957
1.66667	1.66052	1.84468	101.509	362.468	3.306	263.609	586.768	19.338	1.06904	1.00276	2.43012
1.66667	1.55273	1.84468	3.058	77.661	3.719	16.451	147.962	18.925	2.28248	1.07702	1.69149
1.5	1.77454	1.84468	2.14	295.509	15.701	11.318	440.427	74.294	1.36844	2.96136	2.67813
1.5	1.55273	1.84468	106.707	466.271	23.345	242.701	682.216	95.698	2.40496	1.07747	2.64072
1.5	1.77454	1.84468	9.937	73.227	45.451	42.692	179.637	159.745	3.09662	1.4894	4.1835
1.5	1.99636	1.84468	2.905	10.09	4.132	16.757	43.85	26.528	1.59679	2.61255	3.5803
1.5	1.77454	1.84468	14.982	6.115	23.759	58.362	29.71	77.434	1.85539	1.39777	2.5298
1.66667	1.55273	1.82726	90.197	2.446	74.168	218.61	15.399	215.363	2.68836	2.62895	4.54852
1.5	1.55273	1.84468	70.629	3.363	80.366	187.928	19.444	222.803	2.32278	2.2378	2.15641
1.66667	1.55273	1.84468	3.21	3.363	10.536	15.023	18.356	52.56	1.80859	1.03924	3.62858
1.66667	1.77454	1.84468	36.843	500.973	2.479	149.796	1024.96	13.636	2.36371	1.16826	3.74891
1.66667	1.55273	1.82726	339.69	179.935	17.767	865.962	375.319	68.262	0.79838	2.24017	1.46852
1.66667	1.77454	1.84468	9.631	155.627	3.925	38.682	318.246	19.255	2.6563	2.23018	2.88761
1.5	1.66364	1.84468	20.638	181.922	191.722	88.613	347.916	434.365	1.1558	1.42252	3.12853
1.66667	1.88545	1.84468	5.504	7.491	25.618	29.369	31.238	98.509	2.60379	1.35245	1.67593
1.66667	1.77454	1.84468	18.345	2.752	4.958	95.886	16.486	23.553	1.21667	1.83921	2.06757
1.5	1.55273	1.82726	3.516	99.522	4.958	17.98	259.051	21.735	2.86473	3.06671	1.02709
1.5	1.55273	1.84468	4.281	5.351	2.892	25.459	25.664	14.875	2.3073	2.11216	1.56919
1.5	1.55273	1.84468	118.632	113.892	8.47	341.103	232.625	34.214	2.83304	2.59347	2.00249
1.66667	1.77454	1.84468	11.313	224.421	16.528	58.838	360.021	62.147	3.51128	1.6386	1.14428
1.66667	1.77454	1.84468	2.752	329.906	149.783	16.01	569.404	350.153	1.81652	1.60733	1.86695
1.66667	1.77454	1.84468	2.446	9.784	2.273	15.875	42.657	12.727	2.09901	1.71091	1.32136
1.66667	1.55273	1.84468	3.975	178.865	3.925	21.755	313.8	21.487	1.73356	1.87348	2.95639
1.5	1.55273	1.82726	8.867	5.045	39.047	43.509	25.97	128.591	2.47689	1.16795	4.08286
1.5	1.77454	1.84468	6.115	84.082	3.306	34.025	191.572	14.793	2.01015	1.06476	2.99604
1.66667	1.55273	1.84468	5.351	245.365	207.63	31.68	474.669	431.308	0.796761	1.3756	2.57206
1.48192	1.77454	1.84468	1.529	170.762	6.611	9.484	336.287	28.677	2.60204	1.92538	1.71968
1.48192	1.77454	1.84468	430.804	7.338	68.797	983.139	36.031	193.793	2.1432	1.23129	1.58879
1.63011	1.55273	1.84468	364.15	182.075	5.578	831.032	352.843	21.156	0.79838	1.74013	2.92198
1.33373	1.55273	1.84468	26.295	249.187	101.233	111.004	404.583	266.684	4.02236	1.0755	2.97228
1.63011	1.77454	1.82726	43.264	8.102	15.495	135.06	36.607	50.081	2.22007	2.12956	1.97625
1.48192	1.77454	1.84468	112.211	189.413	12.602	321.144	351.113	44.296	1.60429	1.9252	1.34136
1.55602	1.55273	1.84468	9.937	202.713	16.528	38.507	367.259	57.602	3.10287	2.49685	2.37645
1.40782	1.55273	1.82726	206.382	194.152	4.958	550.294	384.572	20.826	2.93759	1.89123	2.13018
1.48192	1.33091	1.84468	308.962	2.599	16.115	789.584	17.098	61.32	3.18165	1.15655	3.61185
1.48192	1.77454	1.84468	39.289	18.345	114.248	118.207	73.083	276.189	4.26375	2.85998	3.80016
1.63011	1.77454	1.84468	22.931	3.058	10.95	76.437	16.01	41.899	1.85324	2.04366	1.69136
1.33373	1.33091	1.84468	126.734	88.821	4.752	349.551	204.169	21.321	3.5438	0.908326	3.24453
1.48192	1.55273	1.82726	7.644	260.5	39.253	30.963	398.909	158.423	3.30473	2.60277	1.15782
1.63011	1.77454	1.84468	13.147	3.363	5.372	57.304	18.356	22.561	2.0999	1.72204	1.09603
1.33373	1.33091	1.84468	581.692	5.504	2.273	1390.87	26.617	13.636	2.95322	2.2995	1.69352
1.63011	1.55273	1.84468	5.504	5.656	11.776	27.905	27.805	41.734	1.23303	1.19461	1.56182
1.48192	1.55273	1.84468	2.14	215.096	11.363	11.318	344.282	40.908	2.32683	0.942676	2.75581
1.63011	1.55273	1.82726	3.21	31.798	24.585	15.023	93.099	79.171	2.05492	2.32532	2.21117
1.63011	1.55273	1.84468	3.822	296.273	8.47	20.938	578.471	30.578	2.55074	1.91869	2.0569
1.63011	1.33091	1.84468	4.892	6.727	377.866	19.95	28.687	848.312	1.90374	1.8927	2.12472
1.48192	1.33212	1.84468	19.109	4.128	108.463	77.695	23.283	251.974	1.76746	3.54541	2.2534
1.63011	1.52242	1.82726	2.14	24.001	17.767	10.536	91.67	61.899	3.01848	1.32961	2.20164
1.33373	1.33212	1.84468	3.21	6.115	5.991	18.151	30.151	31.073	2.77926	1.24503	1.17497
1.63011	1.33212	1.84468	8.561	6.879	222.505	38.236	32.156	355.605	2.53351	1.76336	2.40178
1.48192	1.52242	1.84468	7.491	50.602	88.837	29.058	163.706	257.263	1.57108	1.2491	3.14759
1.48192	1.14181	1.82726	4.281	3.822	4.132	24.201	21.278	23.718	1.44961	1.3121	1.2687
1.48192	1.52242	1.84468	1.682	4.128	2.273	9.619	22.366	12.727	1.60429	2.54421	3.59668
1.63011	1.59291	1.84468	125.664	25.683	2.892	369.044	83.79	14.875	2.2165	2.94154	2.59386
1.55602	1.85839	1.84468	2.905	2.752	2.892	13.629	16.316	13.966	2.23714	1.37259	1.07729
1.48192	1.99113	1.82726	151.041	8.561	11.983	420.18	36.201	41.238	1.63531	2.32516	2.91437
1.63011	1.99113	1.84468	6.574	6.421	43.592	26.442	29.063	115.945	1.83588	1.31683	3.15746
1.63011	1.85839	1.84468	10.396	6.574	129.743	41.123	28.792	307.506	1.15516	1.74329	1.2568
1.33373	1.85839	1.82726	159.449	26.6	99.993	440.626	102.753	229.99	2.14251	1.12498	2.68463
1.48192	1.59291	1.84468	253.468	2.293	63.219	723.542	14.005	159.084	2.15905	4.07775	1.44498
1.63011	1.59291	1.84468	2.599	19.874	45.865	12.236	60.813	157.349	1.11445	4.74072	1.36817
1.48192	1.59291	1.84468	5.351	3.21	91.936	22.431	21.008	212.387	1.86719	1.06912	2.08236
1.7783	1.59291	1.84468	69.406	10.09	62.186	246.29	40.111	177.927	0.796761	1.59205	3.41525
1.33373	1.59291	1.84468	153.793	101.662	83.259	371.557	250.676	195.363	1.59033	1.43769	1.70443
1.48192	1.85839	1.82726	97.535	157.309	98.547	274.346	349.148	254.369	1.84481	1.84008	2.47179
1.63011	1.59291	1.84468	5.045	162.201	51.029	23.384	303.459	170.157	3.14228	1.15947	1.98601
1.48192	1.59291	1.84468	242.614	7.032	69.003	635.049	33.108	178.339	2.18077	1.55468	1.44255
1.63011	2.12388	1.84468	6.727	2.905	50.823	30.657	17.574	147.185	1.48926	1.87222	1.67731
1.48192	1.59291	1.84468	2.446	222.74	133.668	11.93	369.841	293.294	2.20099	1.91403	1.45645
1.7783	1.59291	1.82726	5.809	296.12	85.738	28.041	560.322	193.463	1.11445	3.12319	2.02434
1.48192	1.85839	1.84468	27.518	282.208	4.132	105.596	453.847	19.173	3.53482	2.56149	1.21133
1.33373	1.59291	1.84468	202.713	99.216	417.739	468.065	260.425	764.186	0.796761	1.19435	2.14741
1.55602	1.85839	1.84468	4.281	6.727	521.658	20.291	32.055	973.677	3.81222	1.00276	1.73267
1.55602	1.32742	1.84468	97.688	5.656	148.337	267.158	23.965	262.221	1.11445	1.19614	1.39394
1.63011	1.59291	1.82726	69.864	376.38	74.788	242.605	622.37	188.917	1.07978	1.97279	2.51219
1.48192	1.85839	1.84468	6.421	10.09	142.139	26.171	35.76	347.176	2.05623	1.0349	1.53108
1.48192	1.59291	1.84468	163.271	374.851	39.667	334.433	829.462	132.308	2.43064	1.82932	1.08933
1.33373	1.59291	1.84468	115.115	17.581	145.651	341.445	55.645	300.564	1.42811	1.9224	1.36235
1.48192	1.59291	1.84468	6.115	258.666	131.602	36.507	434.363	284.698	3.24279	3.80149	2.10358
1.63011	2.12388	1.84468	5.045	107.624	138.627	21.108	263.012	279.904	1.41222	2.84308	1.79957
1.48192	1.59291	1.84468	22.778	90.808	270.229	71.064	209.001	435.186	2.81669	1.34356	2.35014
1.48192	1.85839	1.84468	22.931	158.991	72.722	91.801	279.604	217.76	1.69001	1.35223	1.8291
1.33373	1.85839	1.84468	85.457	203.63	104.745	281.418	319.68	260.9	1.07978	1.54588	2.08948
1.63011	1.59291	1.84468	3.363	9.478	145.858	16.111	40.858	330.068	2.77747	2.18269	2.08995
1.63011	1.59291	1.82726	6.879	105.331	177.054	38.647	214.645	374.281	2.4236	2.74349	1.8569
1.7783	1.32742	1.84468	126.122	289.699	78.3	343.436	555.8	226.933	0.796761	1.15655	3.46678
1.55602	2.12388	1.84468	12.689	2.14	60.74	51.289	12.441	180.819	1.20351	1.20002	2.72043
1.55602	1.59291	1.82726	159.755	8.102	28.097	420.73	32.191	102.475	1.66101	1.11106	1.22194
1.48192	1.59291	1.9265	40.053	7.644	125.404	155.596	31.238	300.732	1.87273	1.16511	1.52642
1.33373	1.85839	1.9265	163.271	82.706	55.781	421.533	194.72	172.72	1.19741	1.09669	2.22396
1.48192	1.59291	1.7783	104.72	131.626	2.479	320.667	274.576	13.636	0.79838	2.88864	2.51972
1.48192	1.85839	1.9265	1.529	1.682	44.418	10.095	11.659	173.051	1.85299	1.02149	2.10329
1.63011	1.32742	1.7783	4.128	3.669	36.568	17.639	17.574	124.953	2.4136	1.08838	2.56515
1.33333	1.59291	1.7783	12.689	92.337	12.809	53.089	215.422	58.758	2.15006	2.76479	3.3915
1.63011	1.59291	1.9265	128.416	4.281	418.359	383.411	21.008	858.314	1.83091	3.12502	3.00895
1.63011	1.59291	1.9265	133.002	11.313	380.345	344.738	37.935	867.32	1.84735	1.00276	2.18216
1.55602	1.59291	1.7783	4.433	3.822	181.805	21.549	20.396	354.778	1.54899	1.0394	3.81401
1.70421	1.85839	1.9265	27.67	12.077	101.026	114.473	43.85	265.279	2.55669	1.63405	1.85712
1.32742	1.59291	1.9265	7.797	240.321	215.894	44.697	427.727	385.44	0.79838	1.25842	1.62652
1.59291	1.85839	1.9265	17.275	1.529	210.936	68.317	10.436	515.351	2.25211	1.11667	2.1713
1.85839	1.59291	1.9265	185.132	5.504	63.425	436.561	23.795	200.984	1.36324	1.30943	1.30025
1.59291	1.59291	1.63011	7.338	346.263	450.588	33.138	684.838	680.383	2.49497	1.27505	2.03647
1.85839	1.59291	1.9265	1.835	1.835	84.911	13.053	11.048	223.296	1.30921	1.43655	1.53137
1.59291	1.85839	1.7783	256.831	16.205	175.401	566.681	55.509	351.968	1.81709	3.02735	2.58955
1.59291	1.59291	1.7783	185.591	272.119	55.988	407.438	598.658	186.853	2.26474	2.35638	1.28024
1.85839	1.59291	1.9265	6.421	72.157	154.948	33.038	193.943	268.499	1.95083	1.00234	1.65036
1.59291	1.32742	1.9265	15.746	43.417	92.142	65.595	150.774	247.344	1.12171	2.4276
1.59291	1.59291	1.7783	88.056	5.045	132.429	283.829	22.06	320.978	1.32488	1.45578
1.85839	2.12388	1.9265	5.809	3.21	2.892	24.913	18.186	14.875	2.10879	1.0257
1.59291	1.59291	1.7783	7.95	1.682	114.661	29.975	10.877	240.484	1.35642	1.23142
1.85839	1.59291	1.63011	233.441	17.428	19.627	631.686	60.707	78.178	1.11445	2.19216
1.59291	1.32742	1.7783	2.293	14.829	140.486	11.624	47.078	322.794	2.20566	2.09964
1.59291	1.85839	1.7783	133.919	3.058	92.762	371.135	18.186	199.248	1.11445	3.41111
1.85839	1.85839	1.9265	4.281	3.21	3.925	18.727	18.491	20.578	2.28059	2.18667
1.32742	1.32742	1.9265	1.529	5.656	170.236	8.531	29.675	328.166	0.796761	1.5794
1.59291	1.59291	1.77454	65.737	1.682	158.047	198.284	11.218	321.887	1.63318	1.03226
1.85839	1.85839	1.77454	52.436	4.128	190.689	175.291	20.361	373.952	1.30921	1.16601
1.59291	1.59291	1.99636	16.052	4.433	57.021	58.693	22.537	197.843	2.38796	1.13887
1.59291	1.85839	1.77454	1.987	4.586	186.557	10.231	22.095	334.201	2.58333	3.0006
1.85839	1.59291	1.77454	9.631	2.599	205.977	42.722	13.223	399.572	3.09986	1.07729
1.32742	1.59291	1.77454	14.217	199.808	2.479	56.011	380.207	14.627	1.9061	1.12206
1.59291	1.59291	1.77454	27.518	11.007	4.132	92.167	49.865	23.305	0.796761	3.34505
1.85839	1.85839	1.77454	24.154	147.984	59.087	105.505	279.263	186.685	1.52829	1.38855
1.33333	1.59291	1.77454	149.818	358.188	311.342	414.124	594.566	577.658		1.02709
1.5	1.59291	1.99636	166.023	1.835	2.892	439.227	10.742	14.875		1.41479
1.5	1.85839	1.77454	142.786	109.612	224.778	388.865	305.198	384.53		1.12207
1.66667	1.85839	1.77454	70.17	9.02	120.653	235.332	34.707	265.442		1.1005
1.66667	1.59291	1.99636	41.276	1.682	81.812	146.488	10.572	180.984
1.66667	1.85839	1.77454	183.145	580.163	175.814	448.361	1120.34	365.274
1.83333	1.59291	1.77454	5.656	11.007	126.437	23.825	41.198	239.659
1.83333	1.59291	1.77454	4.892	28.893	192.342	21.514	93.781	353.29
1.33333	1.85839	1.77454	2.599	260.194	149.783	13.8	538.997	304.449
1.58333	1.59291	1.77454	3.058	10.548	195.647	13.935	45.855	340.232
1.66667	1.85839	1.99636	2.446	467.647	475.586	11.93	884.966	837.898
1.66667	1.85839	1.77454	4.739	594.992	110.323	20.426	1233.09	262.717
1.33333	2.12388	1.77454	1.987	191.553	153.708	10.231	356.312	293.79
1.83333	1.32742	1.77454	3.669	151.5	32.849	19.068	297.168	134.043
1.83333	1.85839	1.77454	3.21	2.14	99.786	16.587	13.529	250.897
1.66667	1.32742	1.77454	1.529	16.205	2.686	8.531	65.57	13.553
1.83333	1.59291	1.66342	6.879	21.25	87.804	26.271	95.274	235.362
1.5	1.85839	1.77454	2.446	118.784	21.693	11.93	236.465	81.484
1.83333	1.59291	1.66342	46.016	2.446	5.578	174.123	14.617	22.148
1.83333	1.32742	1.77454	1.529	9.937	302.665	9.313	37.153	612.865
1.5	1.66052	1.77454	2.14	2.599	468.975	12.882	14.617	721.537
1.33333	1.85839	1.77454	2.293	117.714	140.899	12.406	395.605	235.692
1.5	1.85839	1.99636	1.529	1.682	2.066	8.531	11.353	15.123
1.66667	1.32742	1.77454	1.835	1.987	5.991	13.835	11.965	30.825
1.33333	1.85839	1.55273	3.975	815.286	97.514	19.679	1534.76	223.875
1.5	1.59291	2.09332	106.86	2.599	4.339	292.812	16.01	22.974
1.5	1.59291	1.71272	4.433	247.047	71.483	22.943	515.007	158.753
1.5	1.85839	1.90302	88.515	105.178	104.745	275.789	227.187	240.403
1.66667	1.32742	2.09332	7.338	329.6	163.625	32.662	620.562	315.938
1.33333	1.32742	1.71272	1.987	1.682	180.566	13.359	11.965	336.93
1.66667	1.59291	2.09332	210.663	16.969	111.149	438.54	62.136	235.031
1.33333	1.32742	2.09332	49.226	9.784	4.958	131.876	38.071	29.255
1.33333	1.85839	1.71272	20.18	9.478	114.042	83.54	38.512	219.908
1.66667	1.32742	1.90302	244.448	153.334	342.538	437.016	307.368	601.214
1.16667	1.85839	2.09332	11.466	19.874	133.462	50.166	70.532	326.106
1.66667	1.32742	1.71272	2.752	185.438	22.726	13.324	324.737	90.244
1.33333	1.85839	1.90302	126.275	7.338	212.175	314.427	37.494	454.278
1.33333	1.85839	2.09332	162.813	16.969	246.677	330.883	68.457	522.208
1.66667	1.59291	1.90302	3.669	66.807	157.84	19.85	171.651	354.779
1.16667	1.85839	2.09332	1.987	2.14	151.849	12.577	11.659	354.283
1.66667	1.59291	2.09332	297.802	7.797	378.279	524.373	32.837	678.318
1.5	1.59291	2.09332	3.669	53.506	10.743	18.286	191.632	43.469
1.5	1.85839	2.09332	2.752	25.377	388.196	14.105	81.715	723.027
1.16667	1.59291	1.90302	39.289	9.325	29.543	126.884	34.978	95.45
1.5	1.85839	2.28363	2.446	4.281	437.159	13.664	22.707	806.745
1.5	1.59291	2.09332	245.671	218.459	288.823	536.582	443.426	663.94
1.5	1.85839	1.90302	219.988	8.714	268.37	427.813	36.542	602.79
1.5	1.85839	2.09332	3.21	3.669	140.486	16.451	18.356	300.733
1.5	1.59291	1.90302	2.293	15.746	27.064	13.97	50.477	103.219
1.5	1.59291	2.09332	3.822	8.408	54.542	17.845	37.459	141.565
1.5	1.59291	1.90302	33.021	10.396	43.592	140.002	41.98	140.243
1.66667	1.85839	1.90302	28.588	597.591	23.965	111.249	929.829	88.673
1.33333	1.32742	1.90302	2.14	14.523	191.102	11.318	50.206	437.093
1.5	1.59291	1.71272	3.363	1.529	65.904	16.892	9.79	188.01
1.5	1.59291	2.12388	5.962	11.466	89.457	33.208	43.203	240.57
1.5	1.85839	1.85839	31.492	8.408	2.686	119.335	34.978	18.098
1.5	1.32742	2.12388	48.462	422.701	42.972	167.627	804.868	133.714
1.5	1.85839	1.85839	126.275	3.516	214.861	358.843	19.75	406.265
1.33333	1.32742	2.12388	1.682	6.574	16.115	11.183	30.933	55.7
1.5	1.59291	1.85839	498.833	252.551	248.743	958.099	528.099	448.823
1.16667	1.85839	2.12388	69.406	337.244	220.439	225.442	703.857	426.181
1.66667	1.85839	1.85839	212.344	142.48	59.087	489.127	281.979	193.877
1.5	1.85839	1.85839	342.289	179.629	6.405	679.148	353.416	26.693
1.16667	1.59291	2.12388	85.305	13.147	47.931	206.244	64.106	139.665
1.66667	1.85839	2.12388	203.325	2.905	284.484	395.286	16.486	493.039
1.33333	1.59291	2.12388	2.14	1.987	150.196	13.664	13.835	385.687
1.5	1.59291	1.85839	173.82	160.519	3.099	399.882	324.487	15.371
1.33333	1.85839	2.12388	4.739	4.892	103.299	27.464	22.672	272.138
1.66667	1.59291	1.85839	197.668	11.313	60.74	443.998	41.469	192.39
1.5	1.59291	2.12388	231.454	78.884	44.418	486.225	218.003	166.275
1.66667	1.59291	1.85839	12.383	581.845	137.594	61.079	987.22	281.312
1.41667	1.32742	1.85839	19.721	16.205	267.13	85.314	48.948	443.04
1.75	1.59291	1.85839	482.476	699.1	31.609	1069.93	1162.52	122.888
1.58333	1.85839	1.85839	5.045	167.399	444.39	25.459	312.025	852.197
1.58333	1.85839	1.99636	145.996	365.984	265.477	371.305	834.167	502.128
1.83333	1.59291	1.77454	36.69	18.804	189.449	99.991	60.096	505.601
1.75	1.59291	1.77454	179.476	24.001	2.479	413.918	95.309	13.14
1.58333	1.59291	1.77454	10.701	75.368	13.842	42.351	216.475	59.336
1.41667	1.85839	1.99636	280.985	32.257	6.405	538.429	99.796	30.99
1.5	1.85839	1.85839	1.529	1.835	88.63	10.266	11.83	243.297
1.5	1.85839	1.77454	38.983	144.926	422.078	156.077	356.326	861.118
1.5	1.32742	1.77454	7.95	17.275	149.989	35.484	63.53	272.551
1.83333	1.85839	1.77454	160.061	255.149	93.795	306.577	405.409	232.552
1.5	1.59291	1.77454	2.293	271.66	168.583	13.664	539.338	400.809
1.33333	2.12388	1.85839	382.648	85.305	253.908	639.352	207.748	366.266
1.5	1.85839	1.99636	15.593	10.396	4.545	56.527	43.474	19.999
1.66667	1.85839	1.85839	6.574	51.825	3.099	34.772	158.729	14.38
1.5	1.59291	1.77454	14.982	2.752	13.222	55.404	15.399	50.081
1.66667	1.59291	1.99636	7.95	13.606	114.661	37.389	51.394	285.61
1.5	1.85839	1.99967	2.293	3.669	2.066	13.188	18.05	11.404
1.66667	1.59291	1.99967	128.416	6.421	11.776	258.927	28.111	48.097
1.16667	1.85839	1.83303	221.364	71.852	63.219	383.741	230.48	176.521
1.5	1.85839	1.83303	588.418	37.455	13.842	1087.64	117.601	56.279
1.66667	1.59291	1.99967	11.924	4.739	21.073	44.868	24.406	71.154
1.66667	1.59291	1.83303	14.829	242.002	11.363	58.191	452.604	55.452
1.66667	1.85839	1.83303	2.293	1.529	272.088	13.97	10.095	520.557
1.5	1.59291	1.66639	331.893	127.193	698.711	698.177	267.323	1212.27
1.75	1.85839	1.83303	219.988	75.673	146.064	441.137	207.437	313.871
1.5	1.59291	1.99967	1.987	3.516	561.737	11.013	20.226	1229.54
1.66667	1.85839	1.83303	3.975	185.438	65.491	20.938	391.285	180.57
1.66667	1.59291	1.83303	171.985	2.599	113.835	363.741	16.316	276.188
1.66667	1.85839	1.66639	10.396	1.682	54.955	45.815	13.699	160.737
1.66667	1.59291	1.66639	190.789	147.525	237.793	428.965	287.098	369.652
1.83333	1.85839	1.83303	4.281	321.192	10.95	21.855	625.641	43.056
1.16667	1.59291	1.66639	200.879	40.359	3.512	369.404	130.798	19.751
1.83333	1.59291	1.66639	97.229	2.599	19.007	309.749	16.181	80.658
1.66667	1.59291	1.66639	140.34	36.232	43.799	384.152	154.623	139.332
1.5	1.59291	1.66639	4.892	179.629	30.163	22.331	318.577	120.243
1.58333	1.85839	1.66639	7.185	25.683	291.508	33.038	115.701	558.488
1.83333	1.32742	1.83303	1.529	151.806	2.066	10.877	309.409	12.313
1.33333	1.85839	1.66639	239.25	1.835	98.34	489.447	10.877	227.428
1.5	1.59291	1.83303	12.077	70.17	39.873	46.803	199.988	126.028
1.66667	1.59291	1.66639	1.987	262.64	122.925	14.141	407.602	258.254
1.66667	1.85839	1.66639	189.413	3.363	86.564	440.269	16.316	211.066
1.58333	1.85839	1.66639	24.307	243.837	138.627	94.046	528.725	290.319
1.83333	1.32742	1.83303	332.199	252.398	5.165	772.94	516.82	21.239
1.33333	1.59291	1.66639	33.48	223.504	9.503	117.766	407.947	36.28
2	1.59291	1.66639	6.268	2.752	17.767	28.858	13.664	58.263
1.5	1.59291	1.66639	280.985	3.058	3.099	609.899	14.617	15.289
1.66667	1.85839	1.66639	27.67	2.905	9.71	104.011	15.093	35.784
1.66667	1.85839	1.99967	201.949	361.398	5.785	469.035	650.934	23.388
1.66667	1.59291	1.99967	121.536	30.269	22.106	263.042	119.681	76.031
1.66667	1.32742	1.83303	189.566	3.21	5.785	409.111	15.84	25.206
1.83333	1.85839	1.83303	173.667	28.588	22.519	417.491	101.901	72.312
1.5	1.59291		3.058	1.987	30.163	15.499	11.489	96.692
1.66667	1.59291		2.905	5.656	31.403	18.321	29.334	97.353
1.83333	1.59291		2.14	135.295	7.644	12.882	258.355	30.743
1.5	1.85839		4.128	7.185	19.214	17.639	34.091	62.064
1.66667	1.59291		10.396	40.053	27.477	43.946	121.21	86.775
1.83333	1.85839		75.215	4.128	11.983	239.282	24.271	43.057
1.66667	1.85839		215.86	2.14	22.312	391.295	12.747	69.172
1.83333	1.85839		55.647	232.677	12.189	157.17	354.542	44.379
1.66667	1.85839		2.14	13.147	2.066	12.577	54.587	10.495
1.5	1.85839		1.987	110.07	6.405	12.441	269.162	26.445
2	1.59291		9.02	139.117	14.462	39.63	310.206	49.833
1.5	1.85839		6.115	5.045	13.635	27.429	27.94	49.089
1.5	1.59291		2.752	4.128	506.369	16.622	21.89	804.764
1.75	1.59291		10.701	3.822	17.974	51.835	19.409	60.494
1.58333	1.85839		9.478	213.567	2.892	35.349	346.968	14.875
1.66667	1.85839		3.21	1.529	119.62	17.709	9.313	276.93
1.83333	1.85839		9.325	312.172	4.132	34.737	666.102	22.809
1.66667	1.85839		3.822	166.482	163.005	17.709	341.534	362.876
1.5	1.59291		1.682	1.682	145.858	10.401	9.619	269.989
1.83333	1.85839		9.478	1.987	148.956	38.577	11.795	257.84
1.66667	1.59291		169.998	34.091	8.264	389.511	99.219	35.866
1.66667	1.85839		1.682	20.18	11.983	9.619	72.572	43.056
1.5	1.59291		5.656	386.622	61.773	27.429	659.882	164.29
1.75	1.81818		11.771	213.109	167.137	50.913	355.916	265.94
1.75	1.63636		6.268	14.523	74.375	26.612	64.347	181.727
1.66667	1.63636		133.766	2.14	37.187	259.954	14.446	115.698
1.5	1.63636		7.491	18.804	35.741	49.389	73.419	107.35
1.83333	1.81818		264.934	219.071	7.644	525.919	551.771	38.015
1.66667	1.63636		108.695	4.586	105.158	256.595	26.717	269.657
1.83333	1.63636		149.207	330.823	73.755	318.25	626.322	184.868
1.33333	1.63636		3.21	148.289	155.981	14.241	367.212	294.781
1.75	1.81818		4.892	161.131	496.453	19.95	306.692	956.407
1.66667	1.81818		3.363	221.67	161.559	16.111	585.496	332.217
1.75	1.81818		3.21	18.651	58.26	17.369	74.983	179.001
1.5	1.81818		2.752	116.185	167.963	14.105	240.921	380.732
1.83333	1.81818		9.173	2.293	168.583	42.898	13.053	317.011
1.66667	1.78571		12.383	42.652	54.542	62.507	117.746	136.607
1.66667	1.96429		264.934	403.897	19.627	450.416	796.655	68.344
1.5	1.78571		1.682	129.639	70.036	9.619	297.208	205.114
1.5	1.96429		4.281	1.682	72.102	20.291	9.619	165.117
1.83333	1.60714		2.14	121.842	23.139	11.318	255.398	77.848
1.5	1.78571		2.905	7.338	23.139	15.193	30.898	72.146
1.66667	1.78571		2.905	2.446	51.649	18.186	13.188	141.234
1.83333	1.60714		3.058	158.226	122.099	16.281	322.667	377.672
1.33333	1.60714		1.682	6.115	33.262	10.401	23.589	94.707
1.5	1.60714		168.01	2.293	235.934	294.988	14.922	453.537
1.66667	1.78571		51.672	1.835	240.272	134.297	11.489	484.031
1.58333	1.42857		1.682	2.599	2.686	9.619	16.146	14.462
1.75	1.42857		2.293	5.045	93.175	11.624	25.8	216.271
1.5	1.78571		122.148	125.205	33.056	268.936	252.715	90.906
1.66667	1.78571		278.081	1.987	141.726	492.183	10.231	270.732
1.83333	1.60714		6.879	17.428	3.306	31.203	61.013	16.611
1.5	1.78571		7.185	17.275	85.325	34.567	81.339	200.239
1.5	1.60714		16.358	3.975	25.411	72.472	24.065	84.79
1.66667	1.78571		7.95	197.057	3.099	33.99	340.572	14.38
1.66667	1.78571		114.657	8.714	14.875	219.246	38.036	69.253
1.66667	1.78571		4.892	3.975	229.736	23.248	24.236	517.418
1.66667	1.60714		147.984	12.994	112.802	287.703	64.788	259.576
1.5	1.60714		6.574	10.09	299.979	29.334	42.216	603.281
1.83333	1.60714		75.826	70.781	163.831	198.128	189.226	320.812
1.5	1.71272		7.032	28.282	257.42	31.304	82.121	489.481
1.66667	1.90302		5.504	9.631	86.771	26.512	41.469	212.636
1.5	1.90302		1.682	2.599	2.892	10.401	13.018	14.875
1.5	1.90302		3.516	3.669	60.326	16.416	18.627	197.347
1.5	1.80787		17.734	174.584	120.033	80.086	362.171	301.891
1.66667	1.90302		10.09	5.351	44.212	45.344	30.727	146.027
1.66667	1.90302		1.835	685.342	34.089	11.489	1321.37	115.862
1.5	1.90302		13.453	17.122	22.932	55.745	59.144	96.69
1.83333	1.90302		1.682	40.818	72.929	11.354	140.824	179.331
1.33333	2.09332		6.268	1.987	3.925	29.675	13.394	20.825
1.66667	1.71272		37.76	11.619	153.088	127.736	49.184	278.914
1.5	2.09332		4.739	155.322	262.172	25.018	332.506	432.376
1.83333	1.90302		55.952	2.599	218.993	189.085	14.582	407.999
1.5	1.71272		2.752	4.128	164.864	15.058	19.544	315.939
	1.90302		4.281	30.422	71.689	21.855	89.399	175.034
	2.09332		25.53	22.167	42.559	81.239	72.843	111.318
	1.90302		159.908	12.383	63.219	332.282	60.983	142.887
	1.71272		61.609	8.255	224.778	194.323	39.599	456.842
	1.90302		80.26	42.194	51.649	179.912	143.716	153.217
	1.71272		242.767	5.351	9.09	405.811	25.053	53.799
	1.52242		3.363	1088.17	201.845	16.757	2054.91	427.341
	1.90302		3.516	4.586	366.71	17.233	25.629	657.659
	1.90302		4.433	30.575	159.7	20.02	115.37	388.335
	1.71272		5.504	3.516	19.833	23.284	18.356	69.419
	1.90302		3.21	89.738	207.423	18.968	234.596	345.027
	1.90302		6.115	2.446	3.306	28.111	14.752	22.148
	1.71272		5.198	16.205	142.965	24.371	55.68	315.691
	1.90302		5.656	9.478	597.272	24.371	42.657	1050.7
	1.90302		2.14	9.325	60.326	12.441	43.915	179.745
	1.71272		3.822	179.935	29.75	16.928	429.099	101.401
	1.71272		213.873	254.538	15.908	371.414	440.674	63.551
	1.90302		11.924	77.508	169.823	45.173	253.563	330.235
	1.71272		2.14	298.26	208.663	12.441	555.275	349.655
	1.90302		7.797	99.063	136.974	36.913	245.613	290.153
	1.71272		7.95	257.443	5.785	46.126	507.742	28.429
	1.71272		262.64	63.443	192.135	586.472	206.088	336.598
	1.90302		104.72	11.619	140.693	318.341	52.517	268.751
	1.90302		4.586	189.566	17.767	28.451	357.759	65.287
	1.71272		2.599	149.665	2.479	15.058	357.505	14.958
	1.71272		181.005	7.797	240.686	394.007	36.031	494.94
	1.71272		46.474	146.913	38.427	133.957	317.364	129.5
	1.71272		17.122	94.477	28.924	65.77	248.33	109.831
	1.71272		46.016	151.5	274.981	150.984	312.658	505.681
	1.90302		4.128	168.622	3.512	23.319	321.268	19.751
	1.71272		3.975	52.283	99.786	22.366	153.125	276.022
	1.71272		4.433	6.574	242.545	21.89	36.166	444.362
	1.90302		22.931	1.529	353.281	94.462	9.96	537.081
	1.90302		1.835	2.446	84.292	13.223	16.486	233.956
	1.71272		79.648	256.831	184.904	208.424	465.056	310.068
	1.71272		2.599	3.363	12.396	14.446	20.496	54.047
	1.71272		151.806	6.268	19.214	459.892	33.073	71.567
	1.71272		7.185	20.027	164.038	32.497	88.347	266.849
	1.71272		497.763	7.032	167.137	868.04	36.166	285.771
	1.71272		464.589	23.543	175.607	933.577	102.919	344.365
	1.90302		142.021	225.186	326.63	270.932	469	527.249
	1.71272		114.962	21.25	4.958	234.064	69.75	23.553
	1.71272		18.804	9.631	59.5	78.793	37.289	180.819
	1.90302		15.135	6.115	24.378	56.392	28.246	95.121
	1.90302		86.375	14.217	18.8	204.213	72.266	70.824
	1.90302		245.671	11.771	166.517	418.226	44.121	355.608
	1.90302		3.822	6.574	297.5	25.018	30.762	523.445
	1.71272		4.892	31.34	201.845	33.243	89.5	338.002
	1.71272		2.293	201.49	73.342	15.704	363.07	205.363
	1.90302		214.179	18.651	9.503	401.826	63.189	45.535
	1.71272		3.363	3.363	122.099	21.143	20.496	232.635
	1.90302		5.351	4.128	169.823	26.752	22.331	277.26
	1.71272		146.914	14.523	23.345	241.372	55.645	103.962
	1.71272		107.013	4.739	118.174	257.097	24.712	249.658
	1.71272		438.295	1.529	203.085	726.556	10.095	332.714
	1.90302		157.462	5.045	104.125	234.605	27.94	229.66
	1.71272		2.905	18.345	120.859	15.669	68.392	234.04
	1.90302		147.066	13.147	4.132	248.475	56.256	17.355
	1.71272		3.21	5.045	23.552	17.098	27.499	85.203
	1.71272		17.581	846.167	6.405	59.179	1137.5	25.536
	1.90302		8.867	236.193	9.71	33.855	371.65	36.693
	1.90302		2.905	8.408	7.231	17.268	40.993	31.734
	1.90302		1.529	7.032	23.139	10.266	37.629	72.643
	1.90302		120.619	9.631	17.148	260.43	42.386	65.204
	1.90302		10.854	126.428	3.719	42.762	248.295	16.528
	1.71272		156.392	6.879	16.115	297.348	32.291	57.684
	1.71272		1.682	118.326	153.502	10.572	271.714	286.517
	1.90302		4.586	104.261	173.335	22.231	209.557	319.904
	1.71272		24.919	6.115	13.222	86.983	28.146	43.718
	2.09332		20.485	777.984	22.519	86.267	1323.56	72.312
	1.90302		1.529	1.682	10.33	10.572	10.401	40.66
	1.71272		6.268	123.676	5.578	27.364	295.749	22.065
	1.71272		54.271	1.682	2.273	149.591	11.965	12.727
	1.66667		195.681	256.067	7.231	313.454	559.779	29.007
	1.5		1.987	5.809	82.019	11.354	29.845	185.447
	1.66667		240.321	31.798	441.911	565.777	107.65	731.372
	1.5		79.954	112.669	205.564	187.221	265.759	378.248
	1.66667		156.239	193.388	84.085	267.403	349.485	230.9
	1.5		2.752	2.14	147.923	17.268	13.359	307.837
	1.66667		293.521	123.524	326.217	577.035	229.021	684.434
	1.66667		1.682	15.899	205.564	12.612	55.339	479.647
	1.5		10.854	4.892	26.444	39.635	21.278	74.872
	1.66667		199.808	187.426	65.491	444.865	356.762	172.719
	1.5		131.32	66.195	130.569	256.997	213.221	232.387
	1.66667		5.809	192.929	7.851	27.975	327.895	32.065
	1.66667		3.975	31.645	128.297	17.709	109.319	335.191
	1.66667		3.363	431.874	101.439	18.797	643.212	201.892
	1.83333		279.457	217.542	38.634	405.26	382.397	125.119
	1.5		90.502	9.784	203.085	224.64	42.863	406.842
	1.83333		7.032	1.987	86.358	29.198	12.747	214.783
	1.66667		125.511	145.385	15.908	258.826	260.631	58.097
	1.83333		96.006	112.516	59.5	240.89	215.808	148.836
	1.66667		13.759	1.529	3.099	50.376	10.572	17.107
	1.66667		19.721	3.058	20.247	89.976	18.186	79.666
	1.77454		124.899	270.131	63.012	216.59	623.589	150.325
	1.77454		101.509	246.283	254.941	196.263	432.221	380.147
	1.77454		169.998	11.619	105.778	287.353	40.552	196.851
	1.77454		32.715	17.428	255.561	111.285	54.081	371.221
	1.55273		32.41	1.682	17.561	157.004	10.266	68.592
	1.55273		2.14	13.606	24.792	15.093	47.419	85.286
	1.77454		83.47	32.257	26.031	222.264	116.999	99.831
	1.55273		17.886	5.351	34.915	77.124	26.752	106.69
	1.77454		97.229	22.473	3.099	253.026	76.036	18.016
	1.77454		23.696	143.703	4.132	86.101	274.295	28.015
	1.77454		15.593	4.739	110.529	81.409	25.188	233.377
	1.77454		16.969	5.198	15.082	68.427	27.634	56.113
	1.77454		350.85	770.646	5.991	725.66	1412.94	25.619
	1.55273		467.341	185.744	2.273	791.059	315.895	12.727
	1.77454		7.491	3.363	409.269	41.404	21.584	608.65
	1.71272		74.145	287.559	8.47	145.586	550.043	33.305
	1.71272		9.478	5.198	2.479	42.933	26.106	15.867
	1.90302		291.075	7.185	149.163	495.572	31.509	270.153
	1.71272		127.498	184.674	320.845	253.262	346.226	480.307
	1.90302		2.293	17.428	55.781	13.359	66.246	159.497
	1.90302		8.561	3.516	113.422	38.141	21.755	220.486
	1.71272		170.762	175.348	267.543	312	315.669	514.191
	1.71272		131.779	3.21	163.625	341.159	19.273	287.592
	1.90302		102.121	78.578	267.543	196.394	207.04	448.079
	1.90302		133.002	17.122	339.852	250.41	81.68	646.664
	1.71272		3.363	143.856	121.686	18.797	278.179	311.639
	1.90302		3.669	197.821	93.588	21.278	301.083	209.908
	1.90302		2.293	115.574	2.479	14.141	216.851	16.363
	1.90302		129.18	1.529	39.253	244.019	11.83	127.267
	1.71272		171.221	5.656	100.819	250.877	29.675	234.535
	1.71272		3.21	10.243	76.648	20.496	43.68	190.405
	1.71272		176.724	92.948	42.972	351.18	242.24	118.837
	1.71272		193.082	3.21	157.22	361.344	19.273	345.688
	1.71272		2.905	2.905	51.649	15.193	16.181	129.085
	1.71272		3.975	128.568	120.859	27.499	243.849	261.56
	1.90302		123.371	21.25	216.514	273.959	93.134	353.208
	1.71272		7.185	33.174	375.18	40.517	93.645	678.562
	1.90302		8.867	173.208	201.845	42.422	287.999	317.672
	1.90302		24.307	8.714	16.528	93.034	38.376	77.682
	1.71272		7.491	8.867	76.234	36.542	38.512	212.47
	1.71272		69.558	13.606	96.274	182.765	51.429	205.361
	1.52242		5.504	31.187	158.46	31.544	92.933	327.258
	1.52242		2.293	5.045	141.312	15.875	24.712	289.905
	1.71272		142.021	97.535	156.187	299.99	227.397	313.87
	1.52242		47.85	139.117	5.785	133.109	254.721	34.048
	1.71272		39.442	141.257	220.646	157.105	388.096	387.669
	1.71272		520.389	5.809	2.273	1238.6	26.582	13.223
	1.90302		11.16	110.835	153.502	48.371	261.046	354.944
	1.71272		3.058	1.529	14.668	18.832	11.048	69.666
	1.71272		15.746	149.665	48.344	58.126	258.103	153.547
	1.90302		149.36	157.921	184.491	304.962	265.844	361.967
	1.90302		64.208	167.093	309.689	205.035	280.946	536.423
	1.90302		2.14	129.486	68.177	13.699	262.013	157.844
	1.90302		97.382	7.185	98.134	189.802	30.592	201.231
	1.52242		88.668	300.706	69.417	254.901	512.605	168.423
	1.90302		150.583	5.962	3.306	361.38	28.111	17.52
	1.90302		22.473	99.522	153.295	86.918	239.121	291.309
	1.71272		3.363	181.005	164.038	18.662	335.444	327.341
	1.90302		2.293	4.281	127.677	13.359	23.93	287.012
	1.71272		5.809	14.523	9.09	26.311	54.181	37.023
	1.71272		1.987	1.835	28.51	13.359	12.441	107.35
	1.90302		4.586	209.898	74.582	23.354	366.927	217.263
	1.90302		80.718	3.669	191.309	165.331	20.837	338.496
	1.71272		11.007	100.134	3.512	51.158	262.405	19.338
	1.90302		374.087	98.146	16.115	768.474	211.141	69.419
	1.90302		23.696	178.865	185.111	85.149	387.15	376.76
	1.90302		21.708	21.403	194.614	82.021	75.455	323.786
	1.71272		13.453	118.784	364.437	68.427	240.043	694.352
	1.90302		238.945	2.293	104.332	598.206	13.359	265.609
	1.90302		68.183	81.024	229.116	181.647	193.682	354.2
	1.71272		302.541	5.351	6.198	720.371	31.409	24.958
	1.90302		61.609	134.072	18.594	148.809	300.916	58.427
	1.66667		82.4	1.835	252.668	235.478	13.053	380.562
	1.66667		6.268	2.14	112.802	29.233	14.141	253.211
	1.66667		4.739	5.045	142.139	26.141	24.236	318.499
	1.5		1.529	275.788	232.422	10.742	577.26	479.729
	1.5		60.692	16.663	277.46	181.446	59.86	568.818
	1.66667		4.433	8.408	309.069	24.882	38.036	545.182
	1.66667		1.987	5.809	129.536	13.394	31.238	236.105
	1.5		103.344	17.122	144.205	215.246	58.602	247.591
	1.66667		135.295	2.446	49.583	298.692	15.093	147.266
	1.66667		1.835	37.302	83.465	12.612	128.418	197.758
	1.66667		6.421	33.48	135.321	35.183	94.838	245.443
	1.66667		8.714	460.003	88.217	39.499	614.71	220.734
	1.66667		3.058	44.793	189.449	18.356	151.195	355.602
	1.66667		29.964	207.299	256.18	101.836	403.104	536.753
	1.66667		3.058	163.73	72.102	16.963	316.111	168.918
	1.5		2.599	239.403	179.946	19.003	466.418	374.198
	1.66667		76.285	86.222	298.739	218.414	198.71	592.121
	1.66667		5.045	1.987	273.534	27.399	12.577	397.584
	1.5		12.383	4.281	107.844	56.256	21.79	243.377
	1.66667		7.491	176.113	182.219	40.111	340.202	297.424
	1.5		208.981	234.817	22.312	447.238	323.339	84.46
	1.66667		52.131	11.619	216.514	155.295	51.088	359.406
	1.66667		102.274	123.982	230.562	236.756	224.831	357.916
	1.5		152.723	1.835	94.828	412.703	12.271	227.344
	1.66667		5.045	4.892	186.557	25.664	23.419	329.819
	1.5		197.821	102.121	30.99	503.077	227.838	117.02
	1.66667		2.752	1.529	225.604	17.88	8.531	386.344
	1.66667		133.155	73.839	324.564	299.875	168.243	576.42
			6.727	133.308	209.283	30.933	260.315	302.961
			24.919	22.626	139.453	92.352	82.663	235.774
			172.444	5.656	234.901	372.98	28.893	450.141
			15.746	1.987	389.849	60.738	12.747	705.09
			6.727	6.574	85.118	43.203	27.569	221.809
			123.524	161.742	163.625	305.279	292.722	312.879
			4.281	11.16	285.104	25.188	38.106	496.01
			841.581	2.293	4.132	1843.38	15.875	18.925
			4.128	3.822	130.363	21.313	21.925	250.155
			184.98	223.963	174.161	482.416	432.545	276.103
			46.474	162.354	415.053	176.679	319.945	777.65
			2.905	3.822	327.25	21.925	22.401	582.037
			158.685	15.135	105.571	412.283	55.544	215.527
			6.727	33.174	187.59	30.216	106.698	300.151
			123.371	250.563	199.366	256.546	500.788	325.934
			4.281	219.529	202.259	26.411	392.853	322.547
			133.002	6.268	53.922	300.317	25.8	142.638
			4.433	129.027	54.748	22.331	238.851	128.259
			531.854	18.345	10.33	1288.65	61.73	57.435
			39.442	39.136	148.75	142.588	120.467	256.103
			1.835	3.516	93.382	13.223	18.968	259.491
			368.736	11.771	125.611	850.686	42.251	219.245
			255.149	286.489	176.227	526.013	548.101	292.714
			2.446	125.97	170.236	13.664	242.244	287.259
			1.529	31.645	262.172	9.96	109.826	350.479
			3.058	81.483	501.411	16.316	205.191	758.646
			10.548	5.198	51.649	41.499	28.451	152.968
			161.895	123.524	117.967	321.616	278.26	264.037
			4.281	476.666	212.175	20.767	1141.34	442.542
			148.137	218.459	130.363	349.826	441.072	223.378
			1.682	242.002	143.585	10.401	605.719	237.592
			285.878	76.591	190.482	675.256	190.945	313.95
			3.21	268.908	136.561	16.587	450.573	313.29
			1.682	5.198	45.658	11.965	31.374	137.762
			54.577	90.044	80.573	157.497	215.562	173.38
			2.599	11.771	136.974	15.84	46.467	240.319
			4.739	4.739	245.85	23.554	24.101	425.519
			3.058	99.063	85.325	17.063	244.51	199.99
			73.075	2.599	136.767	214.614	15.228	296.597
			2.293	10.09	85.738	13.97	46.261	173.545
			7.032	16.052	7.851	30.998	61.66	32.974
			4.586	4.433	39.873	22.161	22.06	111.4
			1.529	174.737	510.708	10.877	344.478	1029.22
			459.086	57.023	138.007	1139.38	179.401	223.13
			56.717	10.548	417.533	181.021	42.898	693.605
			2.446	20.332	140.073	14.276	96.262	224.453
			137.435	89.127	163.418	282.848	223.337	281.31
			320.886	221.364	278.286	656.994	443.003	565.514
			3.21	29.352	23.759	17.369	82.803	71.567
			2.446	214.637	64.665	15.84	355.649	148.588
			4.433	132.696	362.784	26.852	260.34	627.001
			128.721	97.229	7.231	352.397	220.394	32.312
			4.433	16.663	171.062	22.161	54.762	295.772
			1.682	118.173	5.785	11.183	284.335	28.015
			90.35	5.198	14.255	266.932	26.106	58.014
			179.782	1.529	294.401	391.899	10.436	498.653
			194.305	214.485	125.404	405.392	426.749	238.336
			1.682	2.752	30.99	8.837	16.01	92.971
			268.144	175.807	193.788	499.406	430.043	363.289
			120.925	87.445	167.55	330.052	214.65	344.447
			6.879	262.64	254.114	29.399	523.858	408.082
			160.672	170.762	173.748	333.124	373.314	372.96
			1227.59	6.115	86.151	2263.73	32.291	229.329
			42.194	4.433	125.198	133.445	22.095	263.462
			8.561	23.237	146.271	45.955	73.896	277.674
			2.14	29.658	172.509	11.318	109.896	321.142
			175.96	15.44	9.71	326.117	55.509	42.973
			15.135	94.019	15.701	54.522	219.572	70.906
			4.128	9.478	48.137	18.421	36.577	163.133
			82.247	38.525	84.705	256.957	129.034	182.72
			1.529	1.835	162.592	8.531	14.311	257.758
			384.635	3.21	161.352	941.115	19.138	309.491
			3.058	8.714	170.029	17.063	40.858	300.729
			2.293	127.498	355.14	13.188	314.216	521.71
			137.435	8.102	203.085	365.095	38.241	375.767
			3.363	4.281	265.89	15.329	23.795	410.063
			405.273	118.326	165.897	664.378	287.469	345.19
			2.752	5.351	284.484	14.887	24.712	412.047
			25.224	202.102	217.96	95.806	479.563	410.643
			25.072	14.217	203.705	87.42	70.667	356.762
			32.715	3.516	178.5	133.24	19.444	333.707
			2.293	6.115	166.93	11.624	28.757	297.84
			16.358	2.14	167.344	65.254	12.135	336.93
			21.555	55.188	205.151	78.302	160.909	347.176
			5.045	80.718	82.432	24.166	231.562	205.528
			104.72	59.622	198.54	281.249	167.12	377.753
			11.007	82.553	30.163	51.73	208.469	96.525
			134.225	136.977	379.106	299.189	290.695	658.566
			5.045	60.08	135.941	26.512	204.524	264.949
			2.752	216.931	34.708	14.105	421.534	105.036
			283.279	15.746	5.785	711.869	73.048	34.296
			354.06	16.969	222.712	749.401	64.176	391.554
			8.561	91.878	17.974	40.447	211.447	72.476
			23.237	29.505	115.901	82.518	109.28	318.748
			4.586	398.853	31.816	20.597	804.667	96.607
			11.771	123.982	323.324	50.607	328.301	580.803
			2.905	133.613	145.444	16.757	299.233	313.46
			4.281	1.682	177.26	22.637	10.742	338.993
			419.338	335.562	145.858	810.264	657.957	278.087
			3.363	111.905	16.941	17.845	240.204	62.724
			1.529	43.264	18.181	10.572	140.889	59.914
			129.18	2.14	34.295	332.798	14.787	128.176
			3.058	2.446	168.996	16.928	17.574	324.78
			348.862	10.701	219.406	713.495	42.998	363.95
			3.822	10.243	182.632	20.191	41.299	288.498
			149.36	566.099	174.161	369.681	1156.82	306.68
			31.645	31.798	247.71	124.162	113.049	372.956
			12.689	132.085	210.522	55.264	331.585	353.29
			7.491	66.042	194.614	32.903	162.494	329.488
			83.011	224.88	95.861	180.951	504.646	238.42
			4.281	1.529	505.336	18.186	11.659	699.305
			1.682	70.629	133.668	10.401	203.647	271.392
			294.744	789.45	234.281	637.767	1774.69	381.387
			1.682	242.461	149.576	9.619	530.777	296.271
			5.656	4.128	86.564	22.06	21.449	238.585
			257.901	87.598	345.43	791.016	266.651	674.766
			2.446	3.058	52.682	12.882	18.356	171.315
			23.237	132.39	217.96	77.465	349.091	403.042
			1.835	3.669	134.081	11.354	19.444	309.658
			16.663	583.373	459.265	62.101	1214.24	760.382
			3.669	1.835	245.437	18.627	12.747	353.043
			8.714	12.383	2.066	41.91	54.146	12.313
			10.548	87.598	3.099	51.123	247.909	18.594
			74.909	1.529	31.403	194.379	11.048	115.532
			2.905	2.446	128.917	15.193	16.01	246.764
			1.987	9.784	189.656	12.747	35.895	318.413
			171.679	31.645	75.615	349.356	101.059	209.164
			5.962	39.595	132.429	28.246	111.45	277.508
			14.982	127.957	157.634	67.64	313.128	288.664
			586.125	112.364	315.887	1043.31	280.225	642.53
			5.809	88.668	130.983	29.945	249.543	289.658
			7.491	42.194	384.89	32.256	155.566	678.81
			2.446	6.879	100.406	13.97	31.339	236.024
			2.752	267.227	184.491	15.364	476.854	335.771
			2.599	70.323	240.272	14.276	219.628	434.446
			80.413	217.695	312.375	222.074	438.298	564.354
			7.491	4.586	320.845	35.589	24.542	555.512
			49.226	6.115	9.917	156.138	30.863	45.783
			232.524	94.783	163.625	668.473	270.777	282.053
			104.567	3.669	207.01	291.003	18.151	382.626
			4.433	1.682	214.035	19.033	12.747	355.356
			2.293	188.496	5.165	11.624	412.304	29.42
			1.529	2.14	161.972	10.095	14.922	278.003
			190.942	1.835	130.156	520.172	13.053	225.691
			1.835	1.987	153.295	9.925	12.747	248.831
			2.446	2.293	139.66	13.494	13.664	260.648
			175.501	19.721	188.417	443.342	75.014	298.083
			3.058	18.192	201.845	17.845	79.024	354.528
			2.293	197.21	125.611	12.406	429.391	294.863
			2.446	8.561	191.102	12.712	36.096	311.72
			8.714	5.962	224.571	36.978	27.905	376.097
			2.599	1.682	12.809	13.018	10.877	53.799
			7.185	8.867	193.995	29.229	37.965	338.331
			2.293	40.971	197.507	11.624	135.265	391.137
			5.198	67.418	3.099	22.126	217.768	17.107
			1.682	3.363	199.573	10.401	18.797	327.67
			1.529	198.891	3.306	9.313	474.397	20.247
			9.478	166.482	101.026	40.071	297.899	212.635
			1.682	38.83	29.957	9.619	109.791	114.376
			151.194	118.02	74.375	356.044	244.469	162.059
			49.685	3.975	124.371	151.666	25.324	232.468
			1.529	145.69	147.923	9.313	280.42	250.897
			4.739	124.899	153.295	21.99	292.53	246.185
			333.269	3.975	213.208	666.851	26.888	332.379
			28.435	1.529	204.738	97.756	12.917	325.768
			40.512	6.115	251.015	123.846	29.98	490.968
			245.213	1.682	27.477	591.094	10.572	96.359
			12.689	254.844	221.472	47.825	495.101	372.545
			6.879	137.282	114.042	30.151	345.204	204.289
			2.293	53.812	63.219	15.399	163.395	127.019
			44.334	4.281	104.951	148.052	20.767	207.345
			2.14	143.55	195.028	13.835	302.873	298.994
			3.669	1.987	36.981	19.238	11.965	111.482
			5.809	2.905	10.743	36.066	16.146	40.494
			2.599	160.519	469.182	16.928	323.845	712.363
			36.079	76.591	137.8	125.626	245.703	323.703
			1.987	6.268	183.252	13.529	34.296	345.438
			3.21	405.426	172.715	16.181	632.487	278.003
			3.058	76.285	3.719	17.233	220.716	22.478
			36.69	1.529	3.925	124.468	10.877	21.073
			2.446	123.676	174.575	15.093	297.84	319.242
			5.504	20.485	561.118	25.494	90.587	998.799
			56.87	8.561	68.797	152.644	51.529	143.465
			3.363	176.877	94.415	17.539	369.271	199.826
			31.34	111.599	119.826	94.357	273.599	226.519
			17.734	222.434	61.979	58.156	547.428	151.315
			3.058	20.332	305.764	17.268	76.503	572.534
			3.21	4.128	271.882	16.587	19.203	463.284
			14.217	1.682	21.486	42.557	9.619	77.021
			176.571	508.617	8.47	438.025	941.297	33.552
			9.325	83.164	312.995	34.261	234.882	486.008
			2.599	2.14	167.344	14.787	11.318	294.532
			353.754	5.504	145.238	807.364	24.301	248.501
			4.892	84.999	34.502	21.514	252.896	116.524
			21.708	10.243	164.658	102.447	45.99	271.393
			3.058	3.058	86.151	16.281	17.88	160.488
			9.631	160.214	164.245	33.414	273.908	256.188
			1.529	8.102	208.663	11.524	36.677	324.695
			7.032	2.293	467.529	26.071	11.624	688.399
			87.445	5.504	76.028	240.49	27.669	176.933
			6.115	201.184	16.528	25.629	363.9	66.939
			7.797	172.138	25.618	35.148	394.093	110.49
			3.363	5.504	71.069	18.05	25.865	193.876
			53.201	177.03	4.545	124.809	340.778	23.057
			8.714	206.688	192.755	30.015	478.029	364.86
			18.039	3.363	214.654	63.394	17.674	340.727
			44.945	151.347	214.654	119.58	382.884	376.76
			7.491	1.529	5.165	31.404	10.095	26.28
			94.477	4.586	354.521	267.468	21.685	673.522
			164.036	177.336	128.503	471.48	358.223	255.113
			1.987	1.529	109.91	10.231	8.531	207.181
			18.804	4.128	3.306	65.093	19.985	20.743
			43.264	4.892	154.535	126.613	23.86	290.235
			198.585	508.923	170.856	505.527	897.692	254.947
			2.905	3.058	137.594	16.757	15.499	230.65
			38.219	2.446	71.276	95.58	12.712	189.496
			9.784	98.758	260.106	32.497	245.213	394.114
			1.987	14.065	75.201	11.354	49.244	183.546
			7.185	1.987	254.321	28.757	10.231	430.061
			4.892	20.332	75.615	26.106	67.505	189.249
			52.131	174.278	66.524	128.578	385.63	213.215
			2.446	7.644	555.126	14.311	37.9	933.926
			3.516	140.646	208.87	22.537	325.057	363.786
			7.032	116.185	138.213	28.893	328.897	276.436
			3.058	13.606	192.342	14.922	55.033	381.223
			4.128	88.668	147.923	20.226	212.881	269.905
			11.16	26.6	16.528	40.788	98.407	64.377
			2.752	48.003	197.094	16.928	155.546	329.82
			3.669	79.342	133.048	19.273	278.616	257.923
			2.599	2.14	161.559	18.186	11.659	255.856
			1.835	7.032	120.033	13.223	38.376	235.278
			302.694	63.291	138.213	728.347	216.865	232.883
			13.453	210.204	55.781	50.031	372.628	134.787
			1.529	210.663	136.767	8.872	381.008	249.491
			18.192	4.586	91.522	74.708	23.93	160.572
			246.13	209.134	66.937	629.8	393.33	162.472
			9.937	2.446	5.991	43.234	11.93	26.941
			7.338	137.894	85.531	33.208	266.956	185.528
			1.987	196.904	161.352	11.965	399.918	273.375
			12.077	69.558	148.337	47.82	190.554	241.311
			4.739	27.67	3.099	27.669	90.828	18.016
			1.835	2.293	50.203	11.354	14.617	154.043
			14.676	7.95	317.746	51.354	42.998	614.513
			218.306	11.466	224.778	532.027	68.086	347.999
			117.409	10.09	285.104	359.42	41.77	398.987
			8.561	7.338	119.62	45.309	37.289	206.603
			20.027	5.351	44.212	67.871	25.424	114.705
			5.198	198.433	192.755	23.554	366.818	298.25
			2.752	141.563	136.561	15.364	283.338	248.088
			1.529	1.835	42.766	10.095	9.925	120.325
			521	105.484	2.892	1184.45	249.011	16.28
			3.363	288.018	140.073	18.456	683.706	239.823
			36.69	2.14	54.955	131.741	12.882	140.985
			1.835	137.741	629.914	11.183	278.672	1020.78
			2.446	38.678	185.318	13.494	130.282	332.628
			2.293	1.529	197.094	12.406	9.313	340.894
			23.543	36.079	60.326	95.265	137.075	189.662
			1.835	1.529	302.665	9.143	8.531	585.427
			2.293	44.793	184.491	13.188	151.631	292.631
			1.987	94.171	183.252	11.013	222.299	297.671
			75.826	101.815	66.111	245.488	229.904	187.264
			23.084	107.624	181.805	86.939	335.594	312.466
			4.281	3.058	199.16	22.637	13.935	323.538
			3.516	3.363	94.208	16.416	15.329	191.396
			3.058	7.95	216.514	18.627	33.103	303.54
			105.943	302.388	226.637	305.806	673.502	331.554
			2.599	112.364	179.326	12.236	307.564	295.109
			18.192	1.529	241.925	67.67	9.313	362.047
			2.293	569.003	8.677	11.624	990.429	46.444
			150.735	8.714	216.307	441.332	39.324	334.611
			11.619	82.553	166.104	42.006	216.771	272.548
			214.179	2.905	27.271	436.611	13.629	97.516
			1.987	14.676	255.147	11.795	51.249	365.765
			1.682	143.397	231.802	11.183	408.608	355.27
			1.835	3.363	2.273	9.925	16.892	12.892
			1.682	15.44	2.479	8.837	56.688	12.231
			1.987	5.809	28.51	11.013	24.131	90.326
			2.752	2.905	102.679	12.542	14.411	292.136
			180.088	7.644	192.962	475.238	34.838	313.126
			2.599	17.886	167.55	12.236	57.67	271.971
			2.752	18.192	30.783	15.669	60.628	122.474
			2.752	142.633	14.049	12.542	338.346	53.964
			1.835	2.446	16.115	10.707	11.93	64.129
			28.588	2.905	209.696	95.641	13.629	341.471
			1.682	1.682	64.252	9.619	10.401	136.523
			1.529	188.801	90.283	8.531	435.537	177.264
			1.529	1.682	155.568	8.531	9.619	268.583
			203.783	189.413	342.745	379.782	357.14	566.832
			6.268	42.499	246.47	28.958	150.9	348.494
			4.892	5.198	59.087	20.732	21.344	167.677
			242.155	718.516	221.059	578.563	1309.46	338.742
			2.14	6.115	34.708	13.664	26.306	130.242
			1.682	17.581	218.373	9.619	66.442	308.662
			2.599	4.281	242.958	15.364	20.291	432.293
			11.466	23.543	89.457	57.103	76.803	152.058
			1.987	53.506	281.385	10.231	188.745	445.017
			38.678	5.351	138.627	152.363	21.649	229.328
			2.293	1.529	204.738	12.406	9.313	297.009
			1.987	16.511	66.111	11.795	66.011	177.346
			2.446	33.938	111.769	11.93	104.051	229.163
			1.529	44.945	93.382	8.531	158.603	202.056
			14.37	16.358	255.354	52.201	63.94	379.237
			25.683	47.391	14.255	81.084	125.089	64.955
			19.109	61.456	54.128	60.116	198.448	127.515
			136.212	16.205	193.168	358.243	68.492	330.975
			1.682	11.924	100.819	10.401	39.67	196.272
			2.905	20.332	101.439	15.193	71.384	197.925
			5.809	3.822	93.588	23.349	20.055	187.678
			1.682	72.004	127.884	9.619	200.78	226.683
			225.033	134.378	120.239	593.52	260.5	209.247
			1.987	12.536	11.156	12.577	62.442	47.601
			643.912	1.987	178.5	994.947	12.577	259.161
			10.854	5.809	151.642	41.259	30.386	276.761
			158.226	164.188	178.706	409.272	307.975	274.367
			3.363	82.553	372.081	15.329	312.115	641.454
			6.115	27.823	2.066	23.96	100.172	11.983
			244.295	7.797	129.123	583.354	34.401	257.92
			264.934	501.432	173.335	565.146	1168.77	273.952
			4.128	8.408	23.552	23.113	37.665	90.409
			22.626	98.605	8.677	80.443	243.803	36.197
			475.138	6.574	157.014	940.134	30.592	267.177
			7.185	621.592	163.005	31.574	1112.49	316.928
			11.771	13.912	131.396	50.913	51.494	238.748
			4.739	77.661	186.351	21.99	179.572	290.482
			1.529	1.835	292.335	8.531	11.489	483.281
			141.104	1.682	137.594	280.413	11.353	263.624
			44.945	289.852	6.611	168.845	629.405	25.619
			2.905	139.728	3.099	13.629	349.865	16.363
			2.293	232.677	103.712	10.842	626.272	186.52
			67.112	21.097	7.851	226.711	86.507	34.874
			1.682	4.433	418.359	11.965	24.747	578.069
			2.752	1.682	157.22	15.669	11.965	280.646
			7.338	2.293	154.121	31.88	13.664	243.957
			136.518	11.771	194.201	410.278	46.597	312.794
			418.879	2.14	71.069	997.358	12.882	164.041
			1.835	262.029	149.989	9.925	574.025	251.971
			1.682	241.544	154.121	8.837	475.954	270.896
			3.058	47.544	132.429	14.717	128.784	210.981
			4.586	78.272	4.132	24.812	168.118	21.321
			7.338	77.967	148.13	31.88	168.454	271.723
			85.305	17.122	61.566	294.15	76.713	145.86
			122.759	12.689	139.246	342.684	57.986	262.549
			63.291	367.819	58.054	212.7	825.395	145.944
			159.755	14.676	86.977	383.874	54.788	260.402
			304.987	36.232	96.274	794.179	102.267	242.47
			248.27	23.696	102.679	505.469	71.645	285.856
			224.116	284.043	283.864	488.142	599.299	401.881
			125.358	209.287	180.772	279.615	503.234	389.24
			489.508	2.14	152.262	958.423	10.536	252.304
			2.599	59.622	518.972	15.364	213.457	761.202
			7.644	5.962	235.727	31.133	25.324	359.652
			3.058	12.689	34.915	17.709	47.449	102.31
			7.491	7.644	212.175	30.657	42.251	428.328
			3.21	14.523	76.028	17.369	54.242	198.255
			157.003	62.068	347.703	381.832	178.429	625.013
			5.962	106.401	128.297	26.953	214.26	215.941
			156.85	3.516	250.602	325.696	17.198	360.971
			446.856	13.453	94.208	928.762	50.036	179.413
			1.529	206.382	214.241	8.531	442.544	306.347
			7.95	51.366	43.592	34.532	144.544	137.1
			96.312	291.228	59.293	276.195	644.739	143.548
			75.368	68.335	194.821	246.756	194.013	299.819
			46.627	11.924	272.708	151.862	49.289	470.305
			30.422	134.683	178.913	100.292	274.155	392.463
			1.835	11.466	10.33	10.707	43.234	41.816
			40.206	90.961	2.686	152.233	202.97	16.28
			24.307	104.108	26.031	90.172	229.437	97.268
			2.905	31.798	184.285	15.534	103.334	302.052
			36.232	1.682	237.173	120.689	11.524	355.024
			3.058	243.072	138.007	16.622	537.764	221.974
			21.861	2.446	7.437	89.114	14.005	30.494
			3.975	4.739	218.786	19.679	21.143	320.479
			18.957	7.338	205.564	77.73	29.574	316.346
			3.363	58.398	426.416	17.674	158.634	642.033
			1.529	210.663	160.939	9.313	413.014	267.012
			37.455	5.045	155.154	131.912	23.659	267.424
			201.031	29.352	168.996	432.538	102.382	363.206
			1.682	3.822	160.319	11.183	23.965	250.152
			1.835	1.682	90.696	9.925	12.441	201.644
			162.813	1.835	126.231	390.299	10.572	226.518
			4.586	261.57	60.326	22.331	466.66	151.232
			3.516	430.804	181.599	16.416	752.991	336.515
			4.433	6.421	375.8	22.943	31.238	742.861
			2.446	88.362	128.09	14.276	253.302	230.898
			192.623	2.14	194.614	394.204	11.795	349.239
			2.905	213.72	152.882	16.757	370.928	395.684
			2.446	97.076	123.545	14.752	206.7	268.088
			3.975	45.098	141.726	20.461	182.428	277.507
			2.14	10.854	187.59	13.664	43.885	335.521
			3.975	370.876	154.535	20.02	701.883	260.978
			6.727	190.942	205.771	28.517	348.777	366.346
			2.905	103.191	234.074	19.885	247.723	385.683
			51.366	1.682	237.173	161.481	11.83	434.359
			1.529	46.933	291.508	10.877	168.458	474.192
			7.95	65.584	230.356	31.439	166.824	357.998
			8.255	125.511	2.066	32.562	254.511	10.495
			6.574	11.007	348.942	30.386	54.998	706.165
			5.351	186.508	171.476	25.118	383.51	276.432
			2.599	1.529	238.826	15.364	11.353	446.095
			1.987	116.185	4.132	12.577	241.913	18.098
			2.752	194.916	191.309	15.669	335.881	286.268
			2.752	7.491	477.652	17.709	34.502	711.617
			15.135	270.437	50.616	56.011	602.977	184.867
			3.975	234.205	111.356	18.898	392.102	236.765
			238.639	480.182	215.894	573.99	945.961	297.755
			9.325	5.504	311.962	43.404	27.193	563.03
			2.905	4.281	125.818	16.451	21.619	227.098
			2.905	2.293	29.75	15.975	14.005	96.029
			53.659	132.237	291.095	205.331	314.391	359.651
			9.325	236.499	201.845	39.018	543.995	278.994
			209.134	93.407	164.245	415.345	251.448	289.076
			116.644	2.905	243.991	298.372	15.875	348.494
			7.032	346.263	141.726	41.434	794.315	256.268
			81.788	128.874	232.628	224.726	352.211	430.225
			3.975	3.975	49.583	21.243	19.92	127.597
			45.404	14.065	127.057	145.406	59.655	234.039
			1.529	3.516	148.13	8.531	18.186	287.011
			169.386	8.408	453.687	363.424	45.038	863.516
			156.239	3.669	381.172	327.689	19.273	643.109
			6.574	106.554	172.302	29.569	276.702	323.538
			60.233	179.935	2.479	194.465	298.561	14.049
			12.536	248.117	119.826	55.74	416.062	232.633
			3.363	24.766	194.408	16.111	93.029	277.177
			427.135	139.728	2.892	689.366	297.623	15.867
			2.293	114.962	35.121	11.624	215.126	106.441
			317.217	162.354	114.248	594.624	302.656	196.768
			2.293	191.095	112.389	13.188	430.318	188.173
			1.987	101.357	45.865	10.231	202.444	117.928
			2.599	530.631	126.644	12.236	1027.26	232.55
			1.987	386.928	277.253	11.013	705.191	496.998
			2.446	249.646	190.896	12.712	581.469	289.159
			2.446	79.801	306.177	11.93	182.66	485.016
			7.95	128.874	231.182	31.539	288.842	359.735
			2.293	416.28	245.85	11.624	715.796	495.349
			2.293	229.313	116.108	12.406	413.245	262.963
			1.987	564.264	2.686	11.013	1084.02	18.677
			3.516	115.115	16.321	17.98	251.483	64.873
			3.669	1.529	224.984	18.933	10.572	349.24
			3.975	258.513	138.42	20.461	539.569	217.841
			3.363	7.032	4.132	18.627	35.86	19.503
			72.157	20.027	95.035	234.249	72.673	219.825
			1.682	379.896	6.198	8.837	779.158	27.189
			2.293	14.829	194.614	10.842	62.201	315.274
			3.21	3.21	265.89	15.805	16.622	391.882
			1.987	230.384	54.128	10.231	430.193	145.365
			58.857	2.293	13.429	195.652	13.359	57.931
			13.759	169.539	126.231	65.805	307.014	207.427
			5.809	6.727	210.316	24.913	37.73	349.981
			236.499	2.905	2.892	444.755	19.103	17.189
			34.397	1.682	51.856	143.917	10.572	163.381
			3.21	166.94	278.286	16.587	353.951	420.559
			2.446	191.4	445.836	11.93	347.941	719.389
			1.529	49.837	3.719	8.531	161.346	25.619
			99.216	1.835	249.569	294.892	11.489	380.479
			4.128	6.115	248.949	19.203	27.669	410.642
			2.293	29.964	184.078	11.624	107.48	387.75
			1.987	102.121	71.896	11.013	270.019	174.538
			1.529	13.3	141.106	8.531	50.547	247.592
			2.14	60.539	392.534	11.318	173.521	755.255
			1.529	136.518	275.6	8.531	310.191	485.182
			1.987	62.679	64.045	11.013	165.631	175.446
			9.173	251.939	78.094	36.331	446.218	163.38
			1.529	65.889	235.934	8.531	203.051	374.279
			1.987	268.45	10.95	10.231	472.154	51.733
			4.433	22.626	44.832	19.815	105.981	118.754
			2.446	288.018	177.467	12.712	535.779	278.499
			3.21	3.822	5.991	15.023	22.842	26.941
			7.185	13.759	162.385	29.229	62.337	321.722
			1.529	18.192	212.588	9.313	75.76	335.026
			4.892	104.72	8.264	25.424	251.343	40.328
			2.446	63.138	211.762	12.712	183.612	374.775
			247.811	2.599	230.149	588.348	13.018	357.174
			2.14	367.054	130.156	12.882	703.108	270.318
			5.656	91.878	26.651	25.389	220.896	91.814
			1.682	135.906	117.347	9.619	346.963	217.097
			2.293	126.581	224.571	11.624	336.287	334.942
			240.321	68.03	218.373	455.778	179.833	350.729
			1.835	301.012	303.904	9.925	546.441	486.506
			1.529	77.355	82.019	8.531	216.295	190.819
			3.669	58.093	196.061	15.94	222.159	382.958
			19.721	49.073	73.135	75.59	153.396	185.117
			1.682	2.293	205.771	9.619	18.05	347.503
			4.586	286.948	283.451	20.121	489.051	505.099
			6.115	1.682	75.615	28.858	9.654	196.272
			1.682	18.651	158.873	9.619	78.452	268.665
			30.575	72.616	6.198	117.16	191.802	26.941
			6.574	738.389	153.915	29.639	1335.94	258.169
			11.313	292.604	2.892	56.898	605.386	15.784
			5.045	286.336	12.189	27.294	621.54	48.427
			4.433	17.122	132.222	18.251	65.535	251.227
			2.905	4.586	7.024	12.847	27.058	35.04
			2.446	17.886	101.233	11.93	80.758	251.311
			2.446	11.16	240.686	11.93	47.249	392.377
			2.905	104.72	160.113	14.411	263.348	348.579
			25.836	203.936	287.17	117.676	368.933	483.366
			1.987	30.422	269.196	11.013	111.52	429.319
			7.95	50.602	58.26	38.953	167.025	159.248
			1.682	49.379	157.84	9.619	162.684	272.798
			1.529	15.288	2.066	9.313	56.933	11.404
			517.331	2.599	58.054	873.601	17.709	168.34
			1.835	3.516	244.404	10.707	17.98	360.231
			1.682	84.54	89.457	8.837	243.603	180.652
			18.804	172.444	7.437	71.344	381.029	36.527
			8.255	188.954	209.696	37.254	424.228	395.52
			9.478	26.447	2.479	38.953	95.991	13.636
			164.953	2.752	19.007	360.537	16.451	63.303
			12.383	2.293	181.599	57.409	14.752	342.629
			6.115	26.295	216.101	27.599	104.217	414.858
			15.135	12.689	74.582	73.284	58.362	177.595
			5.656	1.529	229.943	29.198	9.313	406.594
			8.255	129.639	298.739	38.206	245.643	636.418
			2.599	1.529	25.618	17.404	9.313	113.217
			17.581	209.745	109.496	68.252	445.977	312.217
			18.804	3.21	3.306	76.242	15.805	17.602
			2.752	16.205	3.512	17.233	62.407	19.338
			6.115	175.501	221.472	34.502	422.624	453.036
			3.822	228.549	195.441	22.502	431.242	323.871
			13.147	7.95	148.75	51.459	37.865	308.831
			14.982	12.077	117.141	59.414	59.008	247.924
			2.905	30.422	2.066	13.629	124.979	10.495
			5.351	309.879	20.453	30.251	559.369	78.095
			11.466	6.727	66.318	45.173	34.467	156.356
			5.198	5.351	9.71	27.599	28.246	48.427
			7.644	7.032	626.402	35.725	32.326	1243.18
			3.822	1.835	95.448	20.156	9.925	206.769
			142.939	418.879	173.748	282.596	824.881	290.898
			32.715	2.905	55.781	97.821	17.439	138.092
			5.504	94.63	243.165	25.424	209.783	421.636
			27.67	55.647	163.005	109.144	166.554	366.514
			12.689	46.474	204.944	51.053	126.478	488.49
			3.669	1.529	34.295	18.151	11.354	111.565
			8.561	328.988	189.449	39.259	618.337	377.341
			111.599	103.497	203.705	252.716	272.155	364.697
			2.599	240.321	456.993	14.276	517.448	1036.65
			14.676	3.516	117.76	61.079	20.226	313.294
			4.739	34.856	6.198	22.842	134.538	25.205
			4.128	304.223	261.139	18.627	598.794	406.926
			3.363	1.529	284.691	18.456	9.313	517.169
			27.823	135.906	275.187	105.881	289.022	581.714
			3.363	1.529	21.899	17.674	10.095	73.633
			75.368	338.772	220.852	197.036	620.571	410.809
			3.516	3.21	158.047	16.416	17.88	354.367
			48.767	16.052	2.273	163.937	70.296	14.71
			2.446	3.669	135.528	13.835	18.356	305.608
			20.485	1.682	11.156	77.901	10.877	47.271
			5.351	2.446	5.372	22.366	14.922	30.99
			363.385	1.987	217.547	853.376	11.795	465.022
			4.281	58.551	238.206	20.973	168.699	488.409
			3.058	221.67	34.708	14.752	380.237	137.184
			3.21	7.491	15.288	15.669	31.985	66.113
			5.809	61.15	41.733	23.284	204.795	140.16
			8.102	164.647	225.191	31.033	318.106	376.514
			41.735	28.435	222.712	134.778	96.873	395.522
			16.816	24.001	42.352	66.828	84.367	154.374
			4.739	10.09	100.2	19.715	49.559	249.496
			3.975	6.574	232.422	19.273	37.594	381.801
			2.599	2.599	270.436	16.486	15.534	515.019
			3.058	2.752	116.108	18.356	14.005	265.361
			1.835	2.293	114.868	9.925	15.704	258.503
			19.415	23.696	214.448	76.307	85.52	448.081
			7.95	3.21	198.54	36.166	20.667	342.713
			2.905	11.924	30.783	16.622	46.026	109.417
			7.491	6.115	96.481	31.374	28.111	282.882
			9.173	3.21	230.149	45.379	19.138	378.499
			11.619	6.115	266.304	51.735	31.409	429.57
			33.633	162.813	198.746	104.793	299.484	388.992
			1.529	175.195	3.512	10.266	426.518	16.115
			8.867	3.516	7.231	46.432	19.92	29.007
			9.478	4.128	191.722	50.442	23.489	356.678
			1.835	504.49	408.442	10.572	972.219	782.696
			9.173	136.977	153.708	45.82	275.007	305.855
			6.421	259.736	9.503	31.544	513.692	44.213
			25.53	2.905	5.372	82.056	16.01	24.462
			29.199	162.813	231.595	100.648	328.838	391.223
			2.446	5.504	173.128	17.404	27.499	343.375
			12.994	2.446	72.516	60.367	15.228	195.115
			1.529	52.589	4.752	10.095	168.033	21.321
			21.25	42.652	6.611	80.693	107.44	29.751
			2.446	102.732	89.25	15.228	252.912	208.421
			3.975	3.21	146.891	21.755	15.228	283.541
			150.277	15.746	2.892	344.601	58.873	13.057
			5.962	7.338	95.654	26.411	36.812	232.552
			302.694	214.485	3.512	499.11	362.328	17.107
			141.869	1.529	106.604	291.528	11.354	247.014
			1.682	3.822	256.387	11.183	21.584	567.828
			1.682	29.505	241.305	10.401	103.234	400.315
			141.257	7.95	282.625	317.398	34.842	411.388
			1.682	1.835	115.075	12.917	10.266	233.71
			11.007	5.809	252.048	51.936	29.98	384.611
			20.638	209.134	267.13	76.412	429.269	439.983
			128.11	18.957	139.246	252.926	72.096	245.608
			1.835	1.987	169.616	11.489	12.917	303.045
			4.586	2.446	115.694	27.228	16.316	253.625
			1.835	1.987	165.278	12.271	13.529	337.422
			5.962	162.965	120.653	34.502	431.771	256.684
			3.975	5.351	187.384	17.404	25.765	308.831
			3.21	1.835	204.324	14.922	11.353	296.352
			2.14	4.739	158.873	11.659	26.241	292.715
			168.01	6.268	143.792	326.337	34.331	256.518
			172.138	5.656	316.3	307.198	28.111	743.363
			83.929	8.561	86.151	193.471	41.775	172.555
			102.58	337.702	190.069	237.317	617.954	337.095
			17.122	13.147	183.045	72.327	56.968	355.772
			745.575	4.281	2.479	1153.44	24.542	14.049
			122.453	34.244	51.029	269.072	130.352	124.704
			4.281	88.515	73.755	23.113	210.233	260.979
			93.101	134.225	126.644	283.001	332.106	261.311
			27.67	8.102	5.785	116.207	39.905	26.362
			148.442	256.372	247.71	293.459	543.126	477.584
			134.072	11.619	60.12	302.773	56.662	154.952
			8.255	119.243	19.007	39.189	265.353	69.501
			1.987	98.299	221.885	11.013	209.918	439.157
			1.682	13.606	2.892	8.837	59.144	19.007
			106.86	351.461	160.526	257.97	565.171	378.085
			257.137	103.955	273.741	435.214	214.344	525.68
			39.748	2.752	13.016	120.432	16.451	62.642
			158.226	49.379	151.229	358.03	155.912	291.561
			1.987	199.35	218.373	10.231	375.93	446.1
			2.446	16.511	166.724	13.494	72.026	347.84
			1.835	305.446	233.661	9.925	544.483	423.539
			3.363	329.753	245.024	16.111	665.66	508.247
			3.669	207.605	146.684	22.196	341.94	385.277
			4.128	13.912	105.984	23.965	51.259	335.36
			33.786	3.516	72.309	100.648	20.326	192.886
			38.066	28.741	3.099	125.841	84.808	18.594
			3.975	5.198	176.64	21.243	26.035	394.944
			2.14	5.198	248.33	16.01	27.499	436.265
			3.669	34.856	175.401	22.231	107.615	376.598
			2.752	361.398	15.908	17.233	580.931	57.353
			44.64	5.504	194.614	136.267	28.993	414.201
			2.599	234.97	3.719	15.364	418.85	20.247
			11.313	86.833	4.339	41.775	210.364	20.082
			9.631	286.948	160.113	46.091	533.482	324.616
			9.631	327.307	5.578	43.509	489.877	27.52
			12.077	185.744	4.339	61.219	297.574	19.586
			96.465	3.058	228.083	213.025	16.792	391.637
			9.631	131.167	3.925	42.286	275.929	17.851
			9.173	2.446	3.306	40.587	14.276	18.429
			1.682	254.232	2.479	9.619	500.631	13.14
			110.988	2.752	2.066	250.72	17.574	12.313
			263.252	3.21	235.934	374.437	17.88	446.348
			2.14	5.351	225.811	11.318	29.233	408.662
			8.867	189.566	2.066	36.712	337.384	10.495
			93.254	196.445	2.066	204.178	385.725	10.495
			5.351	291.075	10.123	27.158	460.071	35.701
			242.461	31.187	104.538	406.537	93.645	285.694
			1.682	18.651	189.036	10.572	65.399	359.157
			10.09	176.571	209.283	43.374	353.143	457.506
			3.363	141.257	23.345	19.75	322.917	94.459
			3.058	273.953	3.099	17.574	612.35	14.38
			124.288	3.516	12.396	308.986	17.98	56.609
			7.491	2.293	5.165	29.71	11.624	23.966
			2.599	20.027	180.359	14.922	72.878	307.92
			230.842	79.342	4.339	404.702	224.169	22.313
			6.115	1.987	23.139	26.923	13.835	91.732
			10.09	9.784	10.743	41.504	39.158	48.758
			22.778	49.99	2.273	72.302	126.548	13.636
			14.982	2.752	486.949	53.91	12.542	936.409
			2.446	7.185	17.974	16.657	36.983	60.99
			2.905	2.752	30.576	16.928	18.05	84.542
			1.682	2.599	2.273	10.266	13.529	12.727
			1.529	1.987	90.696	8.531	14.787	238.091
			9.325	14.217	5.785	51.158	54.387	24.297
			1.835	6.421	314.027	13.053	34.366	593.037
			4.128	2.446	12.809	22.095	13.494	41.073
			131.014	18.651	2.273	238.274	54.216	14.545
			80.871	2.14	196.474	216.629	11.318	351.806
			15.44	5.504	113.835	51.635	22.877	243.13
			2.599	13.912	7.024	14.311	59.078	29.503
			3.669	2.752	5.785	21.178	14.105	27.933
			6.574	15.593	2.066	28.757	62.572	10.495
			4.739	20.944	3.099	21.79	68.662	17.107
			18.651	46.627	3.925	63.665	148.849	16.942
			3.822	5.504	51.443	16.622	26.647	127.02
			4.892	1.529	3.512	23.183	10.266	19.751
			3.516	2.293	34.089	17.539	13.188	115.78
			8.714	3.516	128.917	35.284	15.634	256.766
			3.669	40.206	58.88	20.667	120.327	157.431
			10.243	157.003	45.038	48.742	353.931	119.003
			5.809	1.682	2.892	24.882	11.183	18.512
			36.384	26.447	145.858	108.127	85.896	237.096
			24.766	13.3	199.573	95.821	53.264	398.329
			12.383	112.669	543.144	51.088	325.664	989.464
			10.09	20.485	2.686	43.815	82.733	13.553
			3.975	2.293	4.545	22.401	11.624	20.991
			8.867	94.324	26.238	37.289	233.022	84.707
			5.809	51.06	10.123	27.975	174.188	42.974
			14.217	14.676	137.18	62.377	53.229	246.93
			239.25	3.363	4.545	529.967	18.456	21.569
			54.729	4.586	397.286	156.563	23.76	613.114
			230.995	3.669	150.196	504.624	16.316	231.974
			31.34	14.523	55.988	96.026	53.264	144.125
			162.201	3.822	15.288	327.819	19.374	58.179
			31.645	4.892	32.023	90.552	25.8	131.233
			63.291	9.478	116.727	196.193	34.467	267.509
			82.706	2.293	113.009	247.963	14.787	226.025
			180.852	20.18	279.526	313.799	70.497	643.78
			89.585	14.523	129.123	223.893	54.998	211.149
			57.175	59.163	72.309	165.235	153.025	142.39
			301.471	12.994	73.342	474.522	55.745	145.283
			2.14	3.058	145.031	12.441	17.88	245.196
			3.822	4.586	63.632	18.832	20.973	138.754
			4.586	135.906	2.066	26.276	309.91	11.57
			46.016	13.147	80.366	150.177	48.607	164.043
			13.759	9.325	340.679	66.828	39.429	774.432
			306.974	13.912	109.496	523.111	55.61	205.282
			2.905	145.232	156.601	16.181	263.212	405.771
			4.128	139.881	106.397	21.619	302.205	195.282
			27.059	14.676	47.517	92.457	57.75	106.524
			175.654	196.904	91.316	307.448	405.596	190.571
			19.109	9.02	120.239	78.146	42.386	224.29
			93.101	2.905	3.512	187.557	18.186	17.107
			16.816	136.365	80.986	69.72	336.934	211.644
			93.101	165.564	51.443	214.374	383.395	161.398
			2.752	129.18	63.219	18.015	381.47	147.35
			6.727	232.677	7.437	34.196	447.144	29.338
			186.203	289.241	8.47	323.629	510.784	36.61
			156.239	205.006	142.345	293.272	458.333	377.094
			32.563	35.62	193.168	121.35	132.839	412.631
			62.22	6.268	20.866	176.995	30.456	56.362
			14.523	6.115	25.825	61.254	23.76	71.65
			1.529	58.398	215.894	9.79	200.574	355.523
			235.581	18.345	32.436	404.226	61.489	99.005
			9.325	17.122	25.825	44.732	86.267	89.584
			124.441	104.261	29.13	262.244	233.036	87.022
			29.046	1.529	10.95	90.487	8.531	38.428
			87.751	35.467	7.024	229.467	128.623	26.776
			363.997	7.032	2.892	589.133	28.281	13.966
			153.181	22.778	2.479	289.153	105.781	12.231
			8.255	35.467	10.123	39.77	119.004	37.519
			231.912	9.937	4.132	393.274	42.351	19.173
			119.396	134.378	2.686	219.096	270.962	13.553
			12.994	66.195	62.599	50.818	201.055	180.326
			143.55	18.039	20.247	314.982	65.264	60.328
			15.288	18.957	29.543	55.815	79.029	77.849
			10.854	10.548	23.965	51.294	55.269	71.898
			6.727	16.052	174.161	34.637	75.7	312.468
			100.898	14.217	12.602	204.213	57.785	49.254
			251.175	278.539	162.798	454.362	434.978	302.715
			2.446	2.293	41.939	13.529	12.441	113.797
			3.21	115.268	103.505	19.409	268.681	242.554
			3.21	16.052	19.833	20.055	70.667	58.097
			1.987	5.656	113.835	14.005	29.369	246.602
			18.345	35.467	151.849	64.347	128.488	295.939
			336.785	5.962	5.785	720.817	27.634	29.833
			3.21	21.25	195.854	19.444	81.169	362.88
			8.408	1.835	23.345	39.77	10.707	80.576
			2.446	5.504	71.069	17.404	27.023	192.472
			89.585	2.446	5.165	241.904	13.359	26.858
			11.313	9.631	58.054	46.908	40.993	150.987
			5.962	21.25	40.7	30.933	75.73	118.508
			19.874	13.606	114.042	66.216	67.675	276.273
			5.351	13.759	140.073	30.286	70.191	308.42
			172.291	1.987	38.634	395.274	10.231	116.938
			11.466	5.504	219.406	47.519	31.985	407.091
			11.771	5.656	5.991	49.66	35.76	29.255
			7.032	163.118	56.814	33.344	363.4	185.696
			14.217	29.352	2.479	53.334	110.883	13.14
			16.052	5.198	4.339	65.84	27.158	23.222
			6.421	2.752	170.029	36.948	14.752	263.131
			4.433	4.586	108.05	25.018	29.98	200.736
			35.773	5.351	2.066	95.585	29.81	11.404
			15.899	108.847	10.33	74.778	224.815	37.437
			15.899	18.957	12.396	65.81	74.232	57.849
			8.255	29.199	3.099	40.076	93.881	18.016
			7.644	4.281	13.842	36.472	27.499	61.32
			229.313	10.701	2.273	424.521	50.918	11.818
			1.987	1.682	50.41	12.577	11.183	129.002
			2.599	6.268	2.479	17.098	29.945	12.231
			42.194	6.574	152.469	141.571	36.031	270.155
			249.493	5.656	40.906	481.923	30.116	130.407
			2.905	158.991	65.904	18.186	329.539	178.67
			22.473	4.739	62.806	81.75	25.459	159.332
			2.293	10.854	6.405	15.704	50.136	31.982
			78.119	45.098	14.049	238.524	151.019	52.559
			97.993	127.345	111.149	201.782	283.509	207.512
			1.835	302.694	132.842	11.489	616.991	263.296
			32.257	16.205	20.866	108.974	59.244	68.509
			1.682	305.446	199.986	12.135	480.283	382.3
			58.857	113.281	12.396	167.511	285.098	58.675
			5.504	20.638	8.677	27.158	97.244	40.99
			142.786	111.599	3.719	303.097	251.462	18.016
			3.822	2.14	2.273	20.361	12.577	14.214
			6.268	8.102	2.066	34.943	35.895	12.396
			7.491	49.99	3.719	35.624	164.764	19.751
			10.701	47.85	4.339	42.457	158.869	20.495
			2.599	132.849	195.854	14.752	272.897	339.987
			76.591	8.408	216.72	177.707	36.472	409.074
			4.739	27.518	3.925	23.624	98.673	20.578
			106.707	3.975	218.166	209.652	21.89	542.292
			3.363	182.381	34.708	19.103	333.593	126.855
			3.058	97.229	150.816	18.797	273.457	318.83
			50.143	3.516	5.991	135.079	20.973	23.801
			1.529	138.964	237.38	8.531	292.691	386.43
			114.962	91.42	51.443	256.299	211.647	169.083
			86.986	5.962	3.925	183.346	32.938	23.387
			2.905	5.962	209.903	16.792	30.286	369.984
			10.396	5.656	8.884	42.386	30.592	37.767
			46.168	2.905	3.925	142.563	16.757	21.487
			6.115	117.867	196.68	26.446	263.283	365.357
			1.529	22.778	192.342	8.531	70.632	368.083
			127.345	6.727	103.505	214.96	33.855	254.122
			3.363	45.404	3.099	20.191	152.002	17.107
			202.255	43.722	9.917	329.744	167.265	40.742
			1.987	2.905	4.339	12.747	16.757	18.677
			7.95	5.045	141.519	36.301	22.025	259.246
			1.529	1.529	198.953	10.877	9.313	320.813
			9.173	4.739	3.306	35.624	28.587	18.512
			80.718	3.669	66.937	177.1	20.973	176.686
			114.81	16.511	54.335	206.193	69.68	135.779
			89.432	3.669	7.231	228.053	21.414	36.114
			111.141	7.185	52.682	241.477	42.727	169.248
			3.058	3.363	82.639	17.268	18.151	221.312
			15.746	3.975	17.561	60.507	20.461	73.633
			5.351	11.007	18.8	27.058	51.7	70.492
			5.962	4.433	38.22	26.276	22.196	98.838
			15.44	61.303	40.7	52.281	179.912	105.698
			27.059	239.556	246.883	97.214	392.797	413.453
			7.644	18.651	222.918	34.401	68.733	415.024
			2.14	215.249	28.51	12.882	371.96	93.219
			18.804	86.68	189.036	73.936	222.784	321.72
			2.446	47.697	215.274	13.835	160.844	427.173
			1.835	2.752	164.038	13.529	15.058	286.021
			10.701	5.045	3.306	42.015	25.289	20.247
			8.714	46.474	12.396	34.572	120.979	59.419
			116.186	35.926	277.253	247.908	102.858	486.755
			25.224	48.003	11.983	103.269	188.248	44.048
			100.592	146.455	3.925	296.61	305.394	19.255
			3.975	214.637	226.637	23.965	323.659	341.14
			89.891	5.504	3.099	178.825	30.898	17.107
			16.205	364.303	109.29	71.249	571.566	249.492
			226.103	3.21	2.066	316.696	19.885	11.404
			8.102	1.529	145.031	31.75	10.877	286.103
			210.357	3.822	3.719	437.099	20.02	20.164
			4.892	49.073	42.146	27.499	157.305	165.613
			110.223	5.351	104.538	261.392	27.193	209.495
			89.279	52.895	14.255	221.723	178.409	66.443
			10.548	2.14	44.418	40.146	12.747	107.516
			16.816	1.529	30.783	62.547	10.877	106.358
			10.09	27.518	4.339	37.018	117.505	28.676
			27.365	192.929	50.823	83.375	330.977	132.722
			7.95	50.908		42.933	137.941
			11.771	2.599		46.126	15.84
			7.644	1.835		30.492	9.925
			4.586	6.115		23.624	31.95
			133.155	2.446		219.988	14.141
			13.3	1.682		45.72	9.619
			17.581	48.156		57.549	133.686
			11.313	16.816		41.063	73.555
			3.669	1.529		20.09	10.095
			13.759	237.569		50.988	491.193
			305.293	5.198		454.768	25.324
			19.874	8.408		62.412	45.92
			89.585	20.18		227.742	63.189
			3.21	72.769		17.098	180.384
			3.822	201.337		17.745	438.627
			42.805	42.194		106.397	137.18
			17.122	32.715		70.943	130.929
			13.147	38.83		63.359	113.705
			7.032	124.135		30.151	258.575
			113.434	306.974		260.715	553.122
			15.593	58.857		51.464	179.301
			157.921	15.135		269.587	52.722
			3.822	38.83		20.702	122.202
			41.429	32.41		131.686	83.62
			175.501	9.631		374.862	41.98
			2.905	43.57		19.614	109.66
			20.027	9.784		71.249	40.246
			2.446	9.631		14.481	46.126
			2.293	15.593		14.787	52.958
			3.21	212.344		18.05	513.44
			3.516	7.338		20.055	35.69
			58.857	64.514		164.252	186.068
			5.198	4.433		27.705	25.935
			42.958	60.233		124.919	208.87
			15.899	66.042		55.85	179.751
			1.835	401.299		13.394	592.13
			2.446	2.293		19.785	13.664
			5.198	18.192		25.835	79.304
			1.987	16.052		13.529	57.479
			30.728	6.421		86.783	29.469
			2.599	33.938		15.704	127.841
			2.293	2.752		14.005	17.233
			8.102	9.478		33.89	43.339
			17.275	3.058		63.394	18.015
			49.073	3.058		152.012	18.321
			39.748	5.504		106.427	29.98
			4.433	2.905		22.231	20.667
			10.09	1.529		43.815	10.877
			6.421	122.148		31.273	251.03
			12.994	27.823		60.131	85.966
			15.899	154.557		53.234	268.329
			48.614	12.077		162.413	52.617
			37.302	20.18		100.071	98.162
			3.058	120.619		17.439	262.956
			1.987	6.115		12.612	34.161
			1.835	38.678		11.048	133.515
			3.975	3.058		21.008	16.928
			309.115	11.007		452.804	50.306
			32.104	154.863		120.668	311.598
			1.682	27.976		12.441	102.011
			2.752	2.905		14.617	15.534
			3.669	55.647		24.136	167.476
			21.097	71.087		66.387	151.125
			3.21	14.829		19.138	65.434
			2.293	1.529		15.093	11.353
			5.198	3.363		24.712	16.451
			12.383	2.599		52.687	16.622
			8.255	5.045		32.02	29.198
			360.939	70.17		706.092	148.207
			32.563	66.348		114.858	204.349
			1.529	10.09		10.877	48.066
			28.741	32.563		83.314	99.259
			8.408	2.599		34.672	15.84
			25.072	1.987		96.096	12.577
			21.25	209.593		61.625	303.202
			3.975	11.16		20.396	43.103
			7.338	14.982		31.103	61.83
			117.103	359.869		298.706	724.435
			23.696	6.268		79.78	27.805
			14.37	20.332		69.209	90.146
			162.813	1.529		269.609	8.531
			1.682	95.547		11.83	219.372
			2.752	131.014		18.356	244.985
			7.491	55.035		36.101	131.48
			5.198	158.991		27.569	268.435
			1.529	2.446		12.306	11.93
			3.669	1.529		22.095	9.313
			7.644	3.669		34.672	18.968
			4.739	43.264		27.94	113.129
			19.721	2.599		68.868	13.018
			3.822	269.214		18.526	513.576
			205.312	66.501		387.284	192.804
			47.391	1.682		147.115	10.401
			10.854	1.987		47.76	14.005
			4.586	98.758		23.013	207.857
			8.714	203.019		42.762	321.703
			3.21	16.358		17.439	58.402
			5.045	10.243		21.178	42.968
			33.938	11.619		102.382	46.231
			9.478	6.268		39.058	31.238
			36.232	1.682		113.771	10.877
			8.255	11.007		35.319	42.321
			35.62	3.21		87.765	18.05
			10.854	10.243		42.321	40.146
			7.032	2.599		27.058	16.963
			2.293	296.732		14.481	395.243
			2.905	9.631		16.351	36.101
			80.413	2.14		233.727	13.664
			12.842	12.383		52.552	40.622
			3.363	206.535		16.657	444.611
			2.905	19.568		15.875	66.898
			47.239	5.962		156.258	27.399
			69.558	9.478		195.14	35.148
			493.024	8.102		828.423	33.89
			2.293	30.881		14.005	98.953
			15.288	38.219		54.387	103.61
			13.147	13.606		50.036	57.72
			1.835	1.529		11.83	10.572
			2.14	11.16		12.612	40.587
			197.974	11.007		332.422	40.111
			3.669	1.529		19.003	10.095
			6.879	6.268		29.775	25.664
			8.867	4.433		38.547	21.79
			10.701	3.058		45.073	18.662
			3.058	6.879		15.704	28.01
			48.614	5.351		119.926	28.587
			24.613	3.21		73.184	19.579
			1.529	4.281		10.266	22.266
			7.644	12.536		30.456	49.289
			1.987	12.077		11.659	48.031
			3.058	37.302		20.055	126.478
			1.987	1.987		12.612	12.441
			83.47	158.532		173.762	286.886
			7.185	137.588		32.802	280.997
			8.255	15.288		48.948	47.895
			47.697	1.529		138.548	9.484
			97.076	13.759		202.339	44.191
			206.994	228.243		429.588	434.145
			144.162	94.783		283.102	189.501
			2.905	4.586		18.186	23.013
			8.102	4.281		38.512	21.008
			7.032	57.787		32.291	174.217
			2.752	9.631		16.622	37.629
			135.754	14.982		298.391	66.557
			1.682	1.529		10.572	9.96
			14.37	1.529		50.136	9.96
			154.099	4.433		280.249	19.885
			1.987	17.122		12.135	58.161
			18.651	2.599		68.627	13.699
			11.924	5.198		49.048	22.401
			170.762	1.682		352.442	9.96
			2.293	16.663		13.359	54.762
			3.21	179.476		18.491	395.914
			3.669	1.529		20.055	9.313
			3.21	1.987		16.451	11.965
			84.846	2.293		210.264	13.699
			3.363	9.325		18.321	36.612
			11.313	7.185		43.033	32.567
			2.446	14.37		15.399	48.747
			9.02	111.446		37.8	235.602
			112.516	25.072		265.668	84.878
			7.797	5.198		33.108	25.223
			31.798	3.058		121.45	18.391
			83.011	42.652		176.444	121.756
			16.205	330.67		62.717	512.262
			1.529	314.465		10.877	393.174
			9.325	3.363		39.635	16.486
			13.147	9.631		49.935	46.196
			160.214	53.354		374.092	134.202
			3.516	1.529		20.191	12.135
			8.714	1.682		38.647	10.742
			9.631	93.56		39.635	202.449
			20.944	5.351		64.246	27.84
			171.374	80.26		298.877	220.037
			8.714	244.448		46.296	541.039
			370.571	79.342		719.878	206.849
			1.529	1.987		10.877	13.394
			2.752	173.82		14.887	300.616
			16.816	62.373		60.131	153.104
			4.281	19.262		25.8	60.336
			3.975	2.752		23.589	14.311
			1.529	3.822		8.531	23.354
			2.752	5.809		21.619	27.669
			72.463	48.156		202.449	146.503
			258.971	40.359		496.249	122.372
			13.912	5.351		58.156	25.188
			2.446	13.606		15.704	48.848
			13.759	107.166		71.585	210.299
			13.3	4.281		54.116	20.396
			109.765	2.446		233.853	14.005
			3.363	9.784		18.662	42.492
			22.167	20.638		63.87	67.204
			21.555	10.243		70.026	51.77
			21.861	18.651		60.236	68.121
			1.682	5.504		11.659	22.877
			2.293	33.938		14.617	97.049
			301.777	8.714		714.778	33.143
			8.255	138.811		32.702	257.186
			175.654	1.529		343.3	8.531
			60.692	83.011		163.025	331.121
			27.823	19.874		85.795	62.241
			2.752	3.822		14.446	23.354
			44.945	18.345		140.348	57.279
			96.465	91.267		198.71	218.739
			3.058	1.529		16.486	11.659
			2.293	25.836		14.752	77.063
			38.372	30.269		139.3	110.748
			55.035	3.363		157.375	20.702
			29.505	35.773		75.87	134.307
			8.867	211.427		34.196	379.583
			12.689	2.293		46.366	14.787
			18.498	2.599		65.845	17.574
			4.739	11.771		30.015	65.399
			2.14	13.606		12.747	47.148
			4.128	23.237		23.489	71.625
			78.884	7.797		228.039	32.532
			252.245	394.266		508.271	655.423
			38.066	107.777		165.195	271.196
			5.656	80.565		25.835	204.088
			2.293	11.313		14.787	41.675
			9.937	10.243		37.8	44.973
			41.582	24.766		159.18	75.464
			9.478	20.027		34.537	72.101
			13.759	1.529		53.504	9.484
			1.987	8.102		12.917	35.624
			4.128	3.669		20.396	19.75
			5.809	11.466		26.311	44.567
			5.351	1.682		24.918	11.354
			11.619	1.682		46.366	10.877
			2.599	125.817		16.351	230.529
			1.835	6.879		13.088	31.85
			8.867	84.846		33.143	198.619
			10.396	4.281		35.624	20.837
			2.14	8.714		14.481	35.183
			4.739	8.102		21.79	35.76
			6.727	12.689		25.97	55.409
			6.268	8.408		25.188	34.707
			2.905	1.835		16.045	11.659
			6.879	5.962		25.664	29.88
			2.752	17.122		14.958	70.637
			5.504	33.633		23.183	89.775
			3.975	6.115		20.055	29.88
			5.198	4.586		21.925	23.659
			2.599	11.619		14.176	44.226
			413.987	78.884		794.092	187.973
			2.905	18.192		15.399	71.214
			4.433	20.332		27.499	68.397
			2.752	9.02		15.569	36.271
			16.969	24.307		64.512	70.537
			2.446	2.599		14.617	18.968
			3.975	17.581		20.837	59.524
			1.987	2.293		11.048	14.481
			20.332	10.854		80.793	41.269
			3.363	19.262		16.316	59.113
			1.529	12.689		10.742	46.537
			3.058	122.148		14.311	241.988
			1.682	19.874		10.266	62.071
			1.682	11.619		9.96	44.056
			2.752	16.205		14.311	53.81
			2.599	23.084		13.835	76.382
			211.427	9.784		418.635	39.499
			3.21	81.33		16.757	174.408
			6.421	27.518		26.341	90.387
			12.994	1.529		58.873	9.96
			57.634	37.76		206.65	126.793
			174.584	4.281		369.063	23.148
			16.052	9.478		73.114	33.79
			6.879	18.957		28.111	64.858
			20.332	5.045		73.625	25.529
			1.529	112.822		10.095	223.622
			107.013	8.102		247.652	35.93
			3.516	188.343		20.326	360.777
			136.212	27.823		358.156	82.467
			7.032	2.293		33.955	14.787
			3.363	37.455		18.456	90.252
			5.198	11.466		23.895	48.848
			2.446	17.275		13.97	58.231
			1.987	2.446		12.271	15.093
			186.355	258.818		417.815	409.027
			4.128	8.714		21.108	41.299
			11.16	47.086		51.224	126.182
			2.446	5.504		14.446	23.319
			2.14	170.456		12.882	397.102
			2.14	50.602		13.359	122.172
			78.578	8.102		260.034	47.419
			32.563	29.811		99.966	84.507
			1.835	136.212		12.271	258.741
			4.433	2.446		20.802	14.005
			39.442	66.195		118.047	226.354
			4.433	3.669		22.025	18.05
			9.173	7.338		42.046	35.048
			1.682	51.978		9.79	124.447
			2.446	1.682		13.835	11.183
			8.714	3.822		31.609	18.526
			14.676	29.964		58.667	88.417
			1.987	3.363		11.354	19.003
			2.293	11.924		12.747	54.797
			1.529	146.149		9.484	271.863
			4.586	221.517		18.491	382.215
			2.599	1.835		13.018	13.699
			1.682	1.835		9.619	11.489
			3.975	11.007		18.321	43.75
			3.669	22.626		17.404	126.758
			67.724	29.811		159.005	103.204
			3.363	43.875		15.84	101.059
			2.446	7.185		13.529	33.584
			93.407	7.338		228.876	34.707
			12.689	5.962		49.319	31.138
			14.829	2.905		59.073	19.614
			17.886	13.147		66.382	50.276
			179.935	3.669		341.163	18.832
			5.351	10.854		24.101	49.188
			218.306	27.67		424.102	98.412
			4.128	5.656		22.196	25.053
			1.682	1.682		9.619	15.569
			154.099	1.682		325.354	11.048
			20.027	3.669		77.399	20.532
			115.727	3.822		300.335	17.439
			18.957	3.822		74.572	21.484
			1.682	1.835		10.877	11.353
			42.499	379.743		127.194	588.48
			16.663	6.421		63.565	27.569
			2.293	2.752		13.188	15.875
			1.682	24.001		8.837	79.715
			3.669	25.377		23.93	89.946
			1.529	1.682		9.313	10.266
			1.529	153.946		8.531	256.098
			162.66	6.421		363.839	28.181
			213.109	3.669		387.865	27.534
			10.09	33.48		46.296	89.229
			96.617	15.135		223.928	67.645
			4.281	59.01		24.236	137.806
			100.898	10.09		239.829	45.244
			9.478	23.084		42.251	77.71
			1.987	27.518		12.577	76.417
			2.293	103.497		13.97	227
			20.485	18.345		77.5	57.073
			16.816	13.606		60.707	52.893
			35.314	13.453		128.518	53.504
			14.829	15.288		54.998	49.529
			16.816	11.924		70.191	46.878
			1.987	9.937		12.577	36.918
			2.752	4.128		16.963	22.095
			20.027	20.638		74.272	62.241
			29.658	2.446		132.367	14.481
			6.727	112.058		31.273	233.316
			5.351	8.561		26.923	38.617
			3.822	16.052		20.361	67.85
			4.739	8.561		25.664	34.807
			22.32	1.529		66.828	9.96
			26.295	3.669		93.645	17.745
			6.727	16.358		30.151	71.078
			55.035	13.759		187.125	53.845
			158.532	31.798		362.887	102.417
			1.987	34.703		12.747	114.994
			87.139	50.908		230.079	158.428
			3.516	288.629		21.925	528.494
			10.09	20.18		44.562	69.72
			4.281	7.95		21.925	35.489
			3.975	70.323		20.702	191.21
			24.46	3.058		112.884	18.968
			1.529	71.699		10.266	174.92
			3.669	108.847		18.491	222.129
			3.516	34.856		18.797	112.006
			8.102	11.924		40.211	49.73
			32.257	199.197		99.054	312.952
			349.168	5.809		461.11	23.489
			97.688	166.329		207.612	280.294
			1.987	1.987		12.577	12.917
			11.313	5.045		45.344	24.271
			1.682	2.752		11.183	14.787
			10.396	3.058		53.875	15.704
			103.344	1.835		228.41	12.306
			16.511	181.922		70.462	303.102
			7.797	75.826		39.735	191.21
			4.128	101.815		22.978	209.186
			13.453	15.746		51.499	59.895
			27.365	8.255		87.8	33.89
			26.295	10.854		84.607	43.068
			6.727	52.895		40.687	142.087
			8.561	40.206		41.063	148.814
			1.529	110.376		10.877	222.033
			1.987	91.42		15.093	272.33
			1.682	270.131		12.612	615.329
			4.586	1.682		27.84	11.048
			1.529	2.446		11.048	15.704
			4.586	67.724		22.707	197.897
			6.115	2.14		29.063	12.135
			6.421	7.95		30.627	34.061
			9.631	18.345		41.98	64.181
			3.822	3.822		24.882	21.313
			28.588	4.433		87.901	21.449
			2.905	11.619		16.657	46.707
			10.243	2.14		42.762	14.005
			1.529	17.122		11.354	60.507
			6.574	87.751		33.755	249.341
			5.656	2.905		27.84	18.05
			5.809	68.03		28.622	155.506
			23.237	6.268		77.299	28.01
			17.581	62.832		62.612	139.23
			2.905	5.962		18.356	25.188
			3.363	20.485		18.662	62.853
			57.175	18.039		192.764	58.602
			4.586	18.192		24.406	58.467
			28.435	218.612		111.014	310.035
			107.624	2.599		267.508	16.657
			1.835	2.446		14.311	16.486
			3.363	1.987		18.968	12.271
			24.919	8.561		80.392	34.096
			3.363	2.599		18.356	15.399
			2.905	62.526		18.321	135.766
			3.975	9.02		23.013	37.8
			96.923	3.21		225.287	19.444
			7.032	1.987		33.073	11.965
			21.708	95.089		71.996	284.48
			1.529	8.408		11.83	35.93
			12.689	1.682		54.321	12.135
			3.822	3.516		23.013	19.138
			5.809	1.529		27.94	10.572
			2.446	1.529		16.657	9.484
			6.727	3.822		31.068	20.667
			5.962	8.561		32.938	36.441
			15.44	68.794		50.412	229.241
			2.446	27.212		15.875	88.918
			1.987	23.084		14.787	68.497
			55.341	660.27		157.45	1571.21
			33.174	38.983		97.014	110.482
			3.975	3.822		20.532	23.489
			1.987	2.446		12.577	15.093
			10.09	7.95		41.845	34.807
			1.835	24.46		13.223	83.825
			3.363	11.16		18.356	46.196
			2.446	162.507		15.093	286.289
			1.987	13.912		12.441	49.359
			3.21	15.746		16.657	55.274
			4.433	6.421		21.619	28.316
			3.21	73.227		18.526	176.689
			2.293	107.472		13.699	199.186
			1.529	4.892		9.654	24.712
			3.669	5.504		18.05	29.233
			23.237	4.128		62.577	20.532
			194.458	8.408		318.736	37.223
			9.478	9.173		47.86	38.617
			4.128	100.745		20.702	219.687
			3.822	12.689		21.313	41.845
			2.293	3.975		11.83	21.178
			2.599	16.969		14.311	55.103
			3.822	25.53		17.098	89.028
			2.752	88.362		14.617	183.617
			1.835	15.593		12.135	50.311
			1.987	21.708		10.742	61.97
			178.1	219.988		342.902	444.69
			1.529	61.15		9.484	179.581
			19.262	17.734		71.214	65.575
			41.582	19.568		131.616	64.757
			9.325	8.714		38.005	32.532
			1.835	13.912		12.271	55.409
			3.363	3.058		18.662	20.567
			3.669	18.498		20.837	66.422
			3.975	48.156		20.361	148.889
			2.14	3.058		13.664	18.221
			80.26	34.856		222.735	93.279
			7.338	19.415		33.619	60.271
			1.987	12.383		11.354	50.988
			9.631	27.365		47.013	77.71
			1.835	4.128		11.659	19.92
			3.975	31.187		19.614	83.384
			1.835	2.752		10.742	15.569
			5.962	14.217		26.923	55.544
			1.835	21.861		12	64.111
			20.18	49.837		72.913	129.445
			5.504	70.017		24.271	193.486
			7.644	6.574		33.108	27.875
			10.701	211.427		41.945	319.423
			2.14	66.96		13.223	215.576
				3.21			17.268
				1.529			10.877
				3.669			19.444
				8.408			34.366
				1.682			9.96
				14.217			46.707
				13.147			49.153
				73.992			181.817
				18.804			59.489
				4.281			21.654
				7.338			32.973
				3.975			22.572
				1.835			13.223
				61.456			145.49
				6.727			29.88
				17.581			75.565
				15.135			49.835
				1.529			10.742
				372.558			688.159
				2.446			18.832
				91.878			214.078
				17.581			55.75
				59.927			164.213
				190.636			304.25
				314.924			431.672
				1.529			11.048
				3.058			15.875
				2.752			15.093
				84.54			203.677
				6.574			28.963
				437.989			747.044
				16.511			63.429
				20.18			62.141
				14.982			52.01
				1.682			11.048
				4.739			27.193
				70.781			185.351
				2.446			17.439
				131.779			392.13
				7.797			32.361
				2.293			15.093
				7.032			30.221
				31.645			84.337
				20.332			68.021
				119.855			256.63
				4.892			26.958
				18.651			56.427
				1.987			12.306
				1.682			11.524
				9.02			36.747
				13.453			46.742
				257.137			491.192
				17.428			59.93
				3.363			17.133
				10.701			36.883
				76.285			157.987
				146.608			237.287
				16.969			55.409
				261.112			415.076
				7.644			32.702
				11.771			43.444
				12.383			45.008
				116.033			241.022
				2.293			14.141
				78.731			196.504
				280.374			593.318
				26.295			87.124
				13.147			47.284
				28.893			92.217
				8.255			34.196
				9.173			36.101
				3.516			21.449
				1.682			10.572
				3.516			18.697
				5.351			26.346
				2.446			17.745
				39.901			118.969
				9.784			35.013
				7.797			31.203
				4.892			22.095
				67.877			234.95
				79.801			222.294
				1.529			11.048
				2.752			18.697
				11.619			41.88
				18.498			56.767
				58.857			155.571
				28.129			74.442
				79.954			250.405
				9.631			34.707
				2.14			12.271
				1.987			12.612
				12.536			44.462
				5.351			25.699
				148.137			383.736
				6.727			28.792
				4.586			23.218
				38.678			125.666
				5.504			25.223
				4.128			21.143
				1.682			9.96
				4.281			20.567
				69.864			203.331
				111.599			309.178
				153.029			358.051
				5.656			29.745
				1.682			10.572
				25.989			99.49
				8.867			31.444
				1.682			11.354
				7.491			28.01
				18.039			61.389
				13.453			43.374
				138.658			410.929
				7.032			31.85
				34.091			109.69
				5.504			23.183
				1.987			12.612
				7.491			32.156
				1.987			13.359
				40.818			126.377
				7.032			28.316
				3.21			20.055
				13.759			54.011
				3.822			21.313
				141.41			275.213
				28.588			121.074
				5.809			25.494
				4.892			23.659
				30.881			93.946
				3.822			21.313
[truncated: 383 more rows]

## Sheet: Figure 8
% myotomes with detached fibers panel C1
Sapje ct no eNMES	Sapje ct eNMES	Sapje MO no eNMES	Sapje MO eNMES
0	25	100	0
0	0	60	40
20	20	0	0
20	0	50	40
25	0	0	33.3333
33.3333	0	0	50
50	33.3333	75	25
100	50	50	25
25	0	50	80
25	0	25	75
0	50	0	33.3333
83.3333	50	20	0
0	0	20	40
0	0	0	0
33.3333	0	80	0
0	0	75	20
40		0
20		0
83.3333

## Sheet: Figure 9
Change in birefringence after 1st stimulation			Change in birefringence after 2nd stimulation			Percent of segments with detached fibers
Panel C4			Panel C5			Panel D4
No NMES	END		No NMES	END		No NMES	END
16.3295	2.5777		9.52472	14.8043		22.2222	50
22.9237	7.27615		28.3049	-15.9246		53.5714	30.5556
14.62	1.23922		3.62119	5.20396		43.3333	53.5714
26.6638	31.1252		28.6536	-3.78553		42.8571	46.1538
7.15417	15.0548		-0.652607	5.68014		70	3.125
7.44281	41.9654		4.25026	28.6315		30.5556	26.3158
-7.19454	-9.21694		-7.2885	-0.878408		15.625	12.5
2.38843	-8.87718		-1.48632	6.90805		50	35.2941
-4.44478	14.9996		4.18556	6.25468		32.3529	21.875
-16.1258	21.4386		-28.4732	32.517		31.25	43.75
-0.84863	5.89325		-4.16379	18.4008		21.875	37.5
-7.51112	2.7578		-9.72616	12.2867		9.375	23.5294
-9.63641	4.58818		-9.45762	-16.3362		35.2941	25
1.46299	-4.681		-10.7554	1.46324		21.875	36.1111
-7.4252	8.37069		2.09322	6.62857		50	43.75
-6.78658	8.54267		-5.67567	1.79082		64.2857	16.6667
8.10415	2.19816		0.836923	1.26548		43.75	8.82353
-3.73566	-1.41872		-2.83678	9.01988		14.7059	20
1.07305	4.92643		6.88374	-0.632338		20
15.6698	-17.2364		4.72838	-18.9886		44.4444
-19.0773	3.58737		-9.14602	6.19408		50
9.37235	5.62121		-5.84232	0.170887		15.625
